# Supplementary material for: Modeling Adsorption and Optical Properties for the Design of CO2 Photocatalytic Metal-Organic Frameworks
Source: MDPI journal article supplement (doi:10.3390/molecules26103060), 2021-05-20
Supplement: s1 [file s1]

## Supporting Information

### Modeling adsorption and optical properties for the design of CO<sub>2</sub> photocatalytic Metal-Organic Framework

Priscila Chacón <sup>1</sup>, Joseelyne G. Hernández-Lima <sup>2</sup> Adán Bazán-Jiménez <sup>3</sup> and Marco A. García-Revilla\*

Chemistry Department, Natural and Exact Sciences Division, University of Guanajuato, Noria Alta S/N, 36050-Guanajuato, Mexico.; p.chaconmartinez@ugto.mx (P.C); joseelyne.hernandez@ugto.mx (J.G.H-L); jabazan@ugto.mx (A.B-J); magarcia@ugto.mx (M.A.G-R)

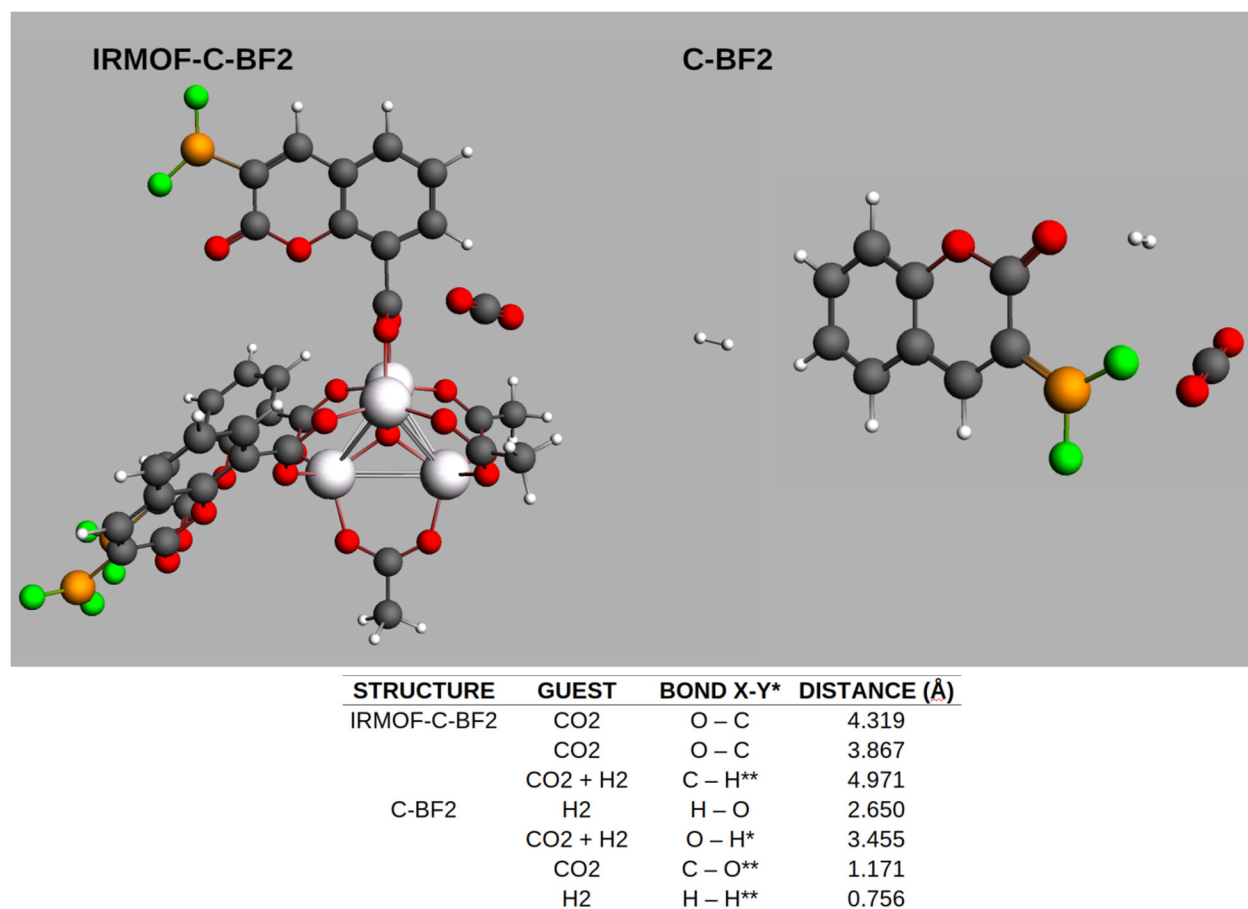

\* In bond column X represents guest atom and Y structure atom. \*\* Both atoms belong to the guest(s) molecule(s) indicated.

**Figure SI-1.** Optimized geometries for the calculation of the brightest excited states of the primitive cell (IRMOF-C-BF<sub>2</sub>) and the linker (C-BF<sub>2</sub>) in the presence of H<sub>2</sub> and CO<sub>2</sub>. The distances specified are shown in Angstroms (Å). Notice the small distances between the atoms of the guests and boron of BF<sub>2</sub> substituents and the O atom of the carbonyl moiety. The association of one oxygen of CO<sub>2</sub> to the boron can be explained with an acid-base chemistry according to Lewis, in which the former behaves as a base and the later as an acid. A similar explanation can be given for H<sub>2</sub> association with the carbonyl group. In this way, the frustrated Lewis pair can be of assistance to the absorption of the guest molecules.

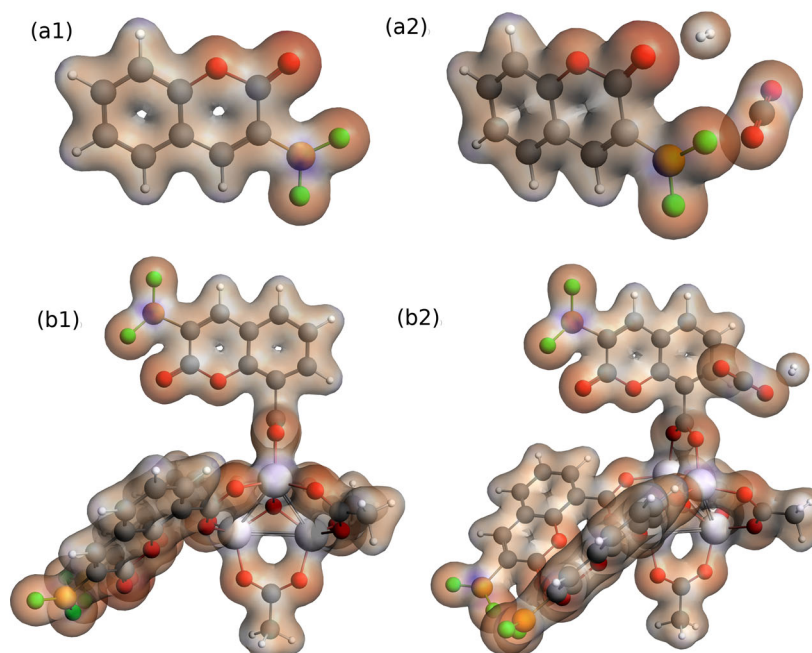

**Figure SI-2.** Molecular electrostatic properties of C-BF<sub>2</sub> linker and IRMOF-C-BF<sub>2</sub>:

Isosurfaces of density and potential of the Self Consistent Field for C-BF<sub>2</sub> (a1, a2) and IRMOF-C-BF<sub>2</sub> (b1, b2) in the presence of H<sub>2</sub> and CO<sub>2</sub> as guest molecules. The considered value for those isosurfaces is settled 0.003. The most electron-deficient places are the boron atoms (a1, b1) for both the linker and MOF. The most electron-rich region in absence of the metallic cluster is the carbonyl oxygen (a1). Nevertheless, the most electron-rich region is not the same in the case of IRMOF-C-BF<sub>2</sub> (b1); here the oxygen atoms of the OCO bridges display this characteristic. For this reason, we can assume that CO<sub>2</sub> oxygen atoms would adsorb near the boron atoms. Although this is observed for C-BF<sub>2</sub>, it is otherwise for the IRMOF-C-BF<sub>2</sub>, see Figure SI-1. In the latter, the absorption of the electron-deficient carbon of CO<sub>2</sub> near the most electron-rich moiety of IRMOF-C-BF<sub>2</sub> becomes more relevant than the adsorption directed by oxygen atoms of CO<sub>2</sub> to the boron atoms of ligand. Comparing (a1) and (a2) Molecular Electrostatic Potentials (MEPs), there is no change in the electron density neither in C-BF<sub>2</sub> nor in the guests during adsorption. Considering that the distance among the guests and IRMOF-C-BF<sub>2</sub> is larger than for C-BF<sub>2</sub>, it is reasonable that the MEPs do not show important changes from IRMOF-C-BF<sub>2</sub> isolated (b1) compared with the configuration in which the absorption has taken place (b2).

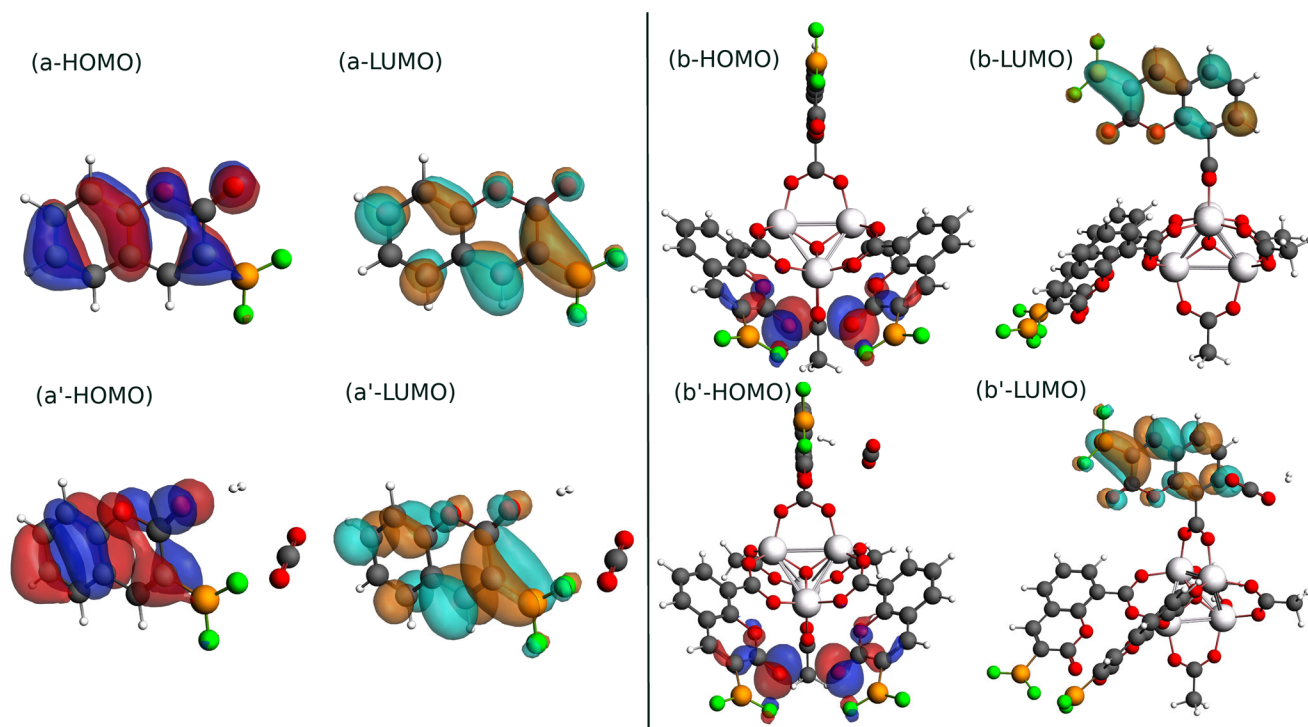

**Figure SI-3.** Frontier Orbitals of C-BF<sub>2</sub> and IRMOF-C-BF<sub>2</sub>. Geometry of the Highest Occupied Molecular Orbital (HOMO) and Lowest Unoccupied Molecular Orbital (LUMO) of C-BF<sub>2</sub> and IRMOF-C-BF<sub>2</sub>, before and after the absorption of H<sub>2</sub> and CO<sub>2</sub> as guest molecules. The images that include guest molecules are indicated with an apostrophe (') after the letter used to distinguish between C-BF<sub>2</sub> (a) and IRMOF-C-BF<sub>2</sub> (b). Regarding C-BF<sub>2</sub>, both frontier orbitals keep their geometry and location over the linker's structure comparing the isolated linker (a) and the structure of the adsorbed guests in the linker (a'). The HOMO has a bonding character mostly on the coumarin-based-rings (eight lobes above and below the plane of symmetry of the molecule, six of them above and below the rings and two on the oxygen atom of the carbonyl moiety), whereas the LUMO shows an antibonding character (fourteen lobes, above and below the plane of symmetry of the molecule). In addition, the apparent bonding character across the bond-path (see QTAIM results) that links the boron atom and the carbon of the carbonyl group in the LUMO support the region near the boron atom as the most prone to interact with the guests' HOMO. For the case of IRMOF-C-BF<sub>2</sub> (b and b'), HOMO and LUMO are located on the linkers, excluding the MOF's central cluster as the probable absorption moiety. Such situation corresponds to the observed profile of the MEP: the electron density available for absorption is not in the metallic cluster of the MOF. The HOMO shows mainly antibonding character (sixteen lobes); it is distributed over two linkers, it has a symmetry plane that includes the coordinate axis that goes through the coumarin moiety whose atoms do not contribute to the orbital, this results in a symmetrical shape of the lobes in both linkers involved. The LUMO has antibonding character, with its highest probability zones above and below the plane of one of the linkers, a similar distribution to the observed for C-BF<sub>2</sub>; in a similar fashion as C-BF<sub>2</sub>, the orbital's morphology is kept when the guest are absorbed (b').

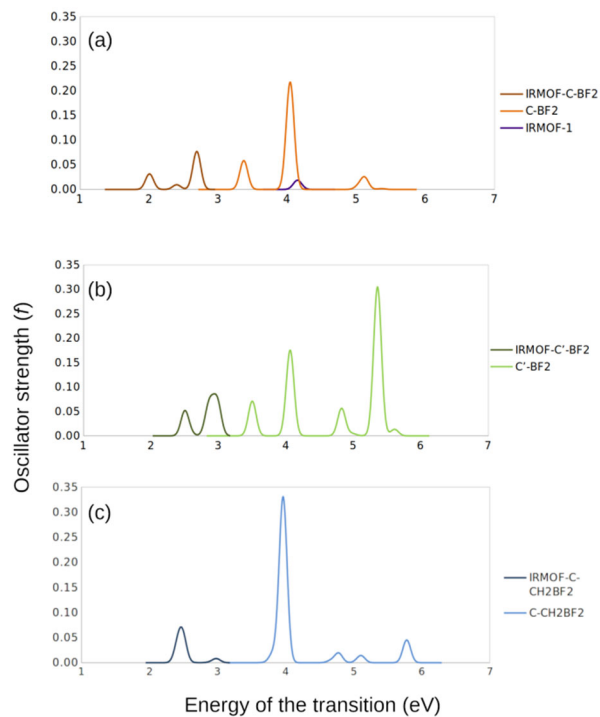

**Figure SI-4.** Calculated UV and Visible spectra of MOF and its parent linkers in the presence of H<sub>2</sub> and CO<sub>2</sub> as guest molecules. (a) IRMOF-C-BF<sub>2</sub>, C-BF<sub>2</sub> and IRMOF-1; (b) IRMOF-C'-BF<sub>2</sub> and C'-BF<sub>2</sub>; (c) IRMOF-C-CH<sub>2</sub>BF<sub>2</sub> and C-CH<sub>2</sub>BF<sub>2</sub>. The oscillator strength is plotted as a function of the transition's energy (eV). The  $f$  value of IRMOF-C-BF<sub>2</sub> and IRMOF-1 is multiplied by a factor of 10.

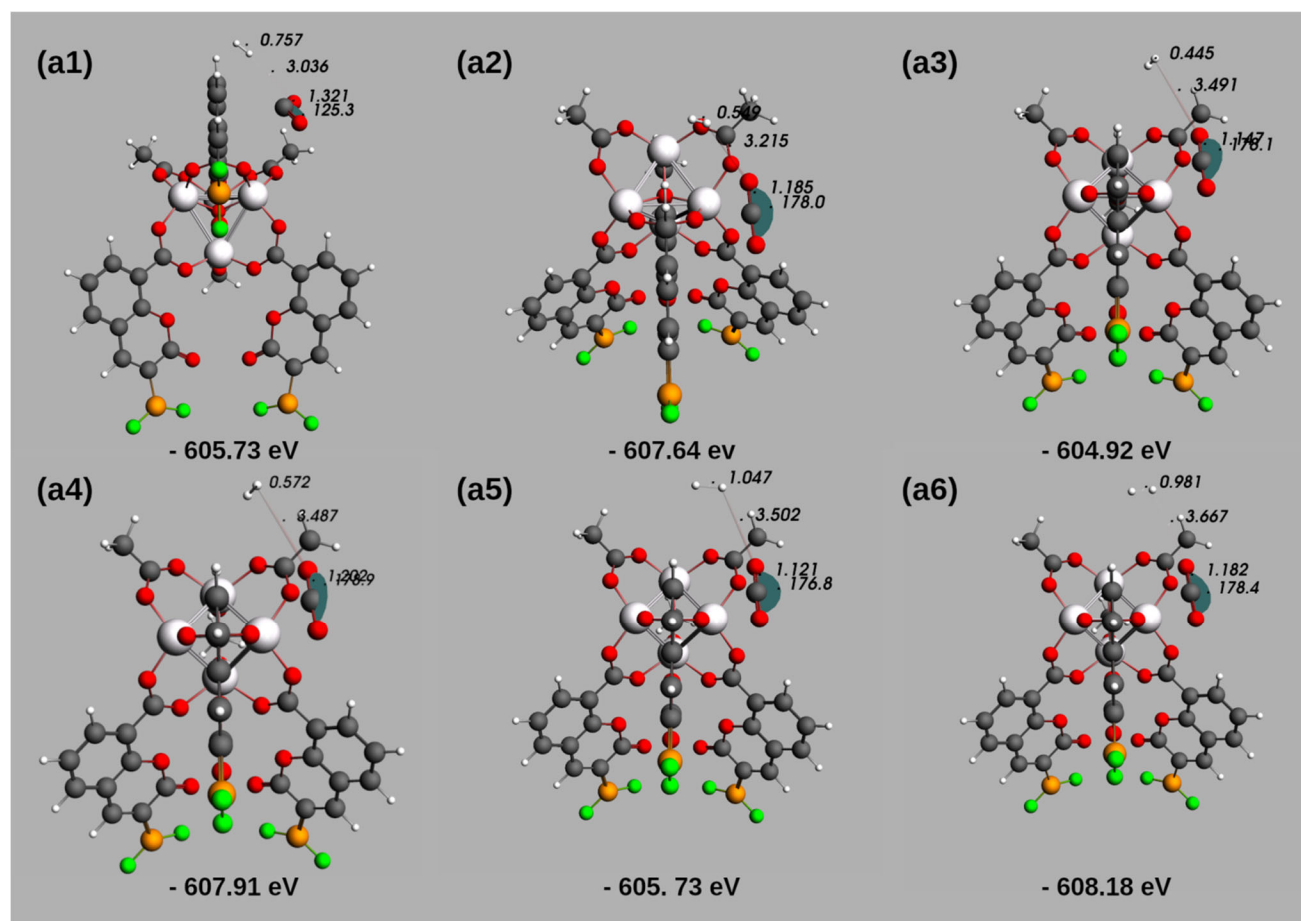

**Figure SI-5.** Energetic maximums obtained during excited states optimizations for IRMOF-C-BF<sub>2</sub>-H<sub>2</sub>-CO<sub>2</sub>. The energies and the most significant distances and bond angles of all geometries are included. As a comparison, the energy of the minimum is – 608.807 eV. The first maximum (a1) shows appreciable distortion to the OCO angle in CO<sub>2</sub> (30.39% of distortion, 125.3°) and elongation of the OC distance in 13.15% (1.321 Å); H<sub>2</sub> is placed 3.036 Å away from CO<sub>2</sub> with no appreciable HH length distortion. The next two energetic maximums (a2, a3) present just slight elongation in one of the OC distances of CO<sub>2</sub> (lower than 2.5% of the equilibrium distance for isolated CO<sub>2</sub>); HH distance is decreased in both cases (to 0.549 Å or 26.90% of decrease for a2, and 0.455 Å or 39.41% of decrease for a3); however, the distance among the guest molecules increases in some extent (to 3.215 Å for a2, and to 3.491 Å for a3). In the named (a4) maximum, compression of HH bond length (to 0.572 Å or 23.83 % of decrease) and elongation of OC distance in CO<sub>2</sub> (to 1.202 Å or 2.38% of decrease) can be perceived; the distance among both guests is 3.487 Å. In the fifth maximum (a5), the guest molecules are 3.502 Å apart; HH and OC bond lengths are elongated (to 1.047 Å or 39.41 % of elongation, and to 1.121 Å or 4.51% of elongation, respectively). The last energetic maximum (a6) is just slightly different from the previous: the guest molecules are 3.667 Å apart; and HH bond length is elongated (to 0.981 Å or 30.63 % of elongation). The energetic differences among all maximums are lower than 2.72 eV.

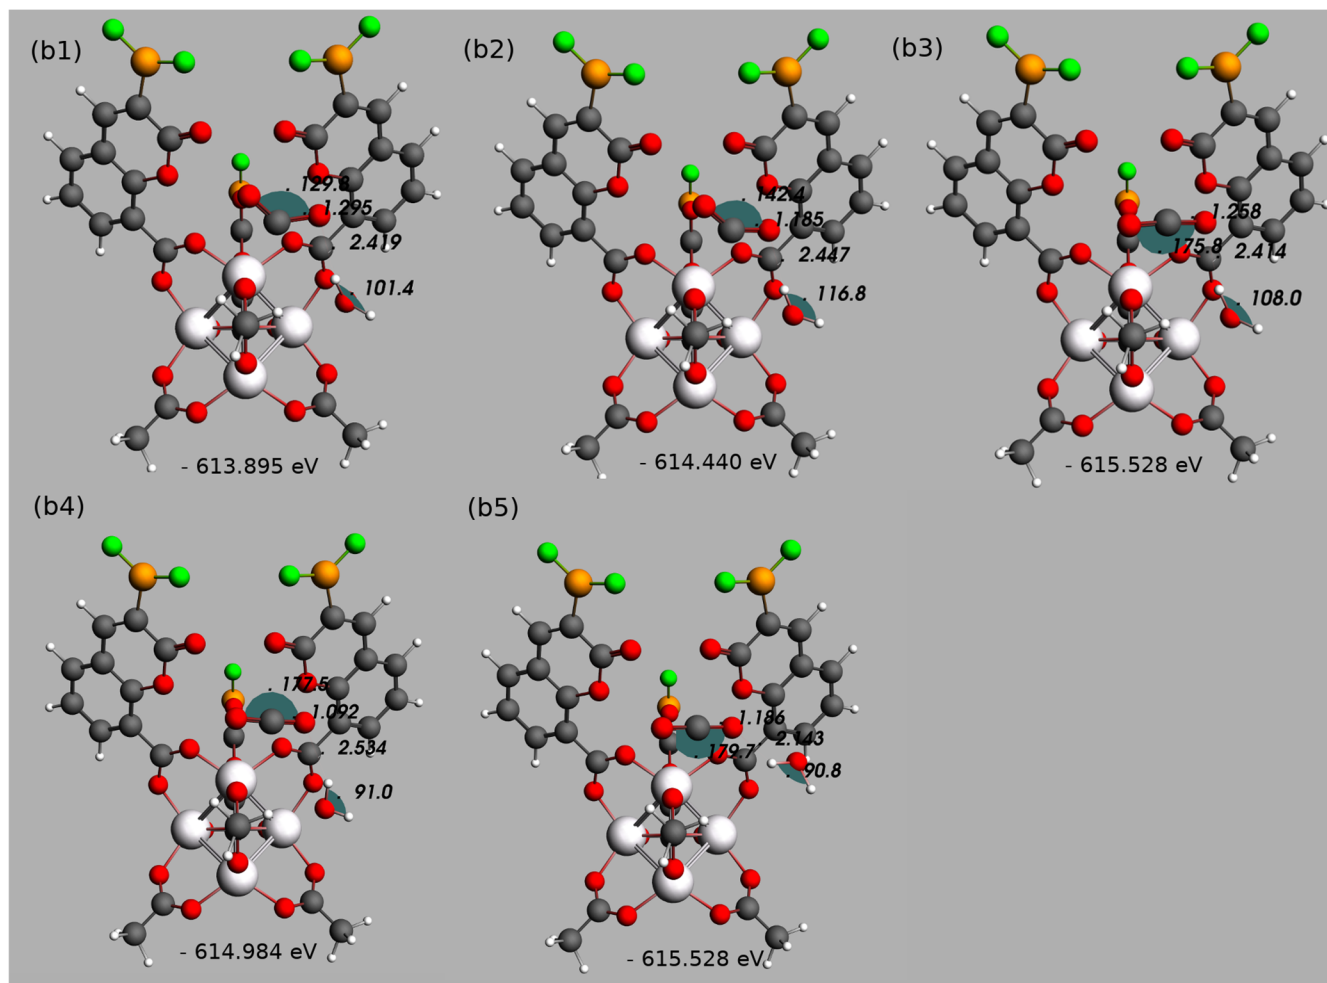

**Figure SI-6.** Energetic maximums obtained during excited states optimizations for IRMOF-C-BF<sub>2</sub>-CO<sub>2</sub>-H<sub>2</sub>O. The energies and the most significant distances and bond angles of all geometries are included. As a comparison, the energy of the minimum is - 616.263 eV. IRMOF-C-BF<sub>2</sub> keeps guests absorbed while the distance among the guests falls in the range of 2.143 Å to 2.534 Å. OCO angle is distorted in the first two maximums (to 129.3° or 28.17% of distortion for b1, and 142.4° or 20.89% of distortion for b2), but kept almost unchanged in the next three. In the first maximum (b1), only one OC bond length is elongated (to 1.295 Å or 10.31% of elongation); HOH angle in water is slightly reduced (to 101.4° or in 2.97%) with no distortion of bond lengths. HOH angle in H<sub>2</sub>O opens in the next maximum (b2) (to 116.8° or 11.77% of distortion) with no appreciable modification to the equilibrium bond lengths for both guests. The third maximum (b3) shows a longer OC distance (1.258 Å, or 7.16% of elongation) than the equilibrium one for CO<sub>2</sub>; HOH angle in H<sub>2</sub>O is also distorted (108.0° or 3.35% of distortion). The last two maximums (b4 and b5) are characterized by a compressed HOH angle in the water guest (91.0° or 12.92% of compression for b4, and 90.8° or 13.11% of compression for b5); while both OH bond distances in water are kept constant, OC bond lengths are distorted for CO<sub>2</sub> (1.092 Å or 6.99% of distortion for b4, and 1.186 Å or 1.02% of distortion for b5). The energetic differences among all maximums are lower than 1.36 eV.



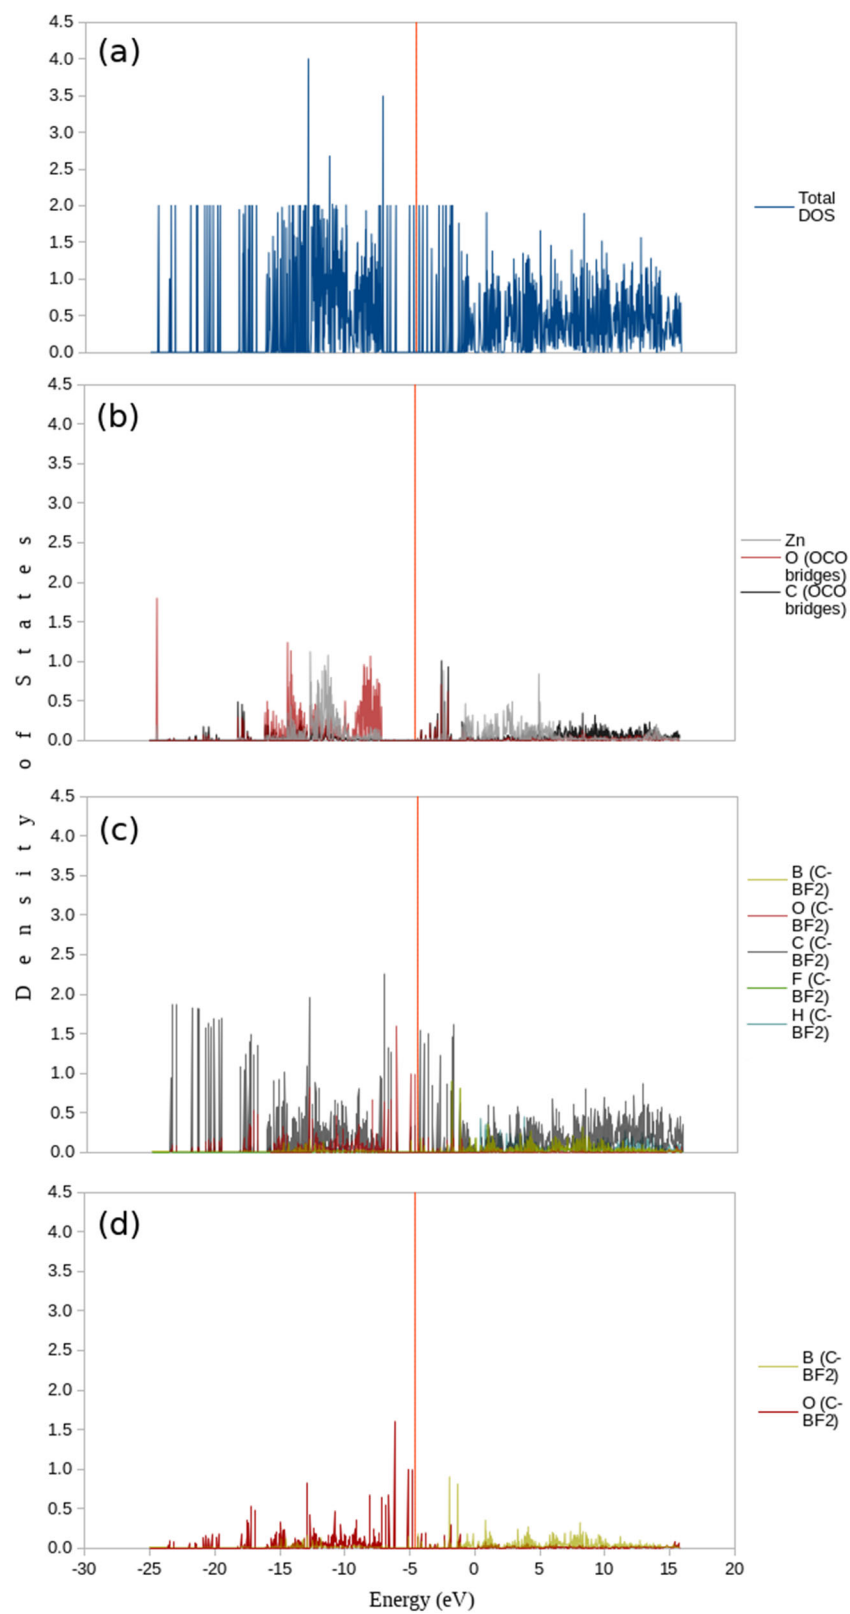

**Figure SI-7.** Density of States of IRMOF-C-BF<sub>2</sub>, as a function of energy (eV). The DOS are represented as (a) Total Density of States, TDOS, and Partial Density of States for the following fragments: (b) Central cluster, (c) C-BF<sub>2</sub> linker and (d) FLPs in linkers. The orange line present in all charts indicate the Fermi Level, with a value of – 4.63 eV.



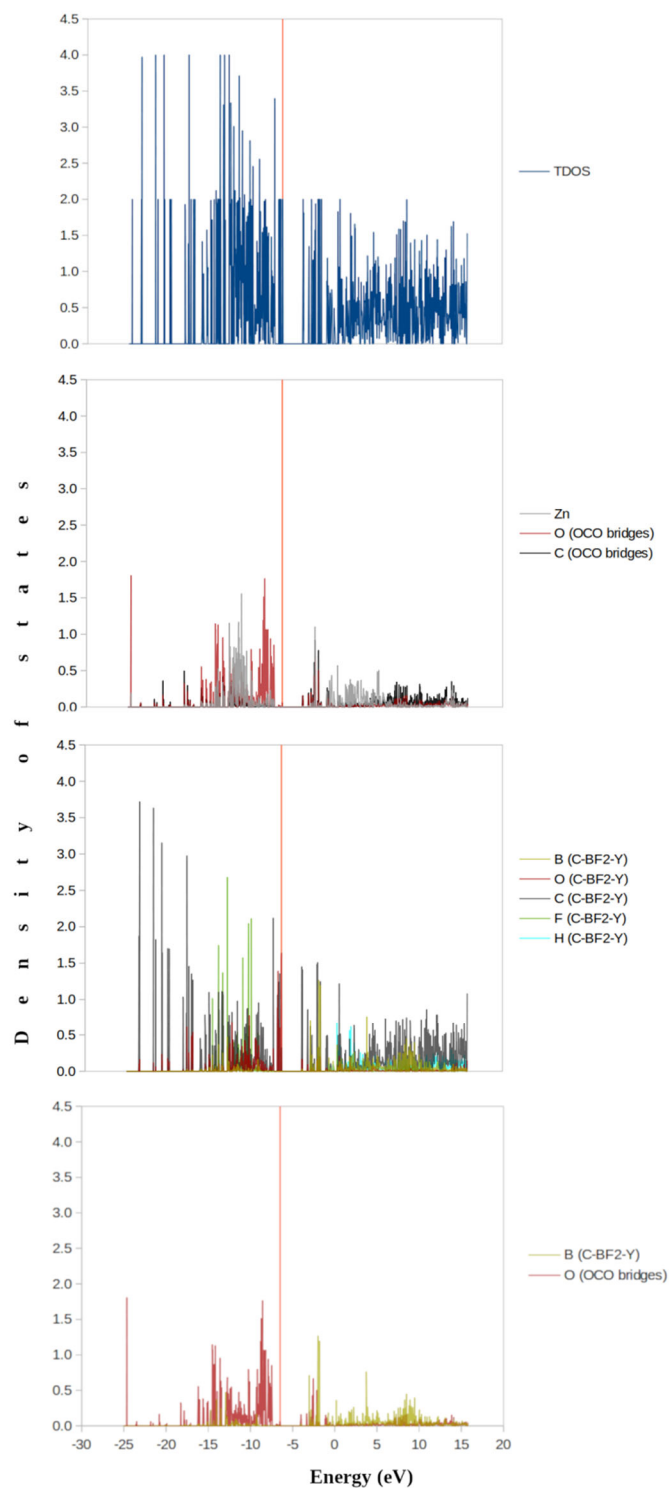

**Figure SI-8.** Density of States of IRMOF-C'-BF<sub>2</sub>, as a function of energy (eV). The DOS are represented as (a) Total Density of States, TDOS, and Partial Density of States for the following fragments: (b) Central cluster, (c) C'-BF<sub>2</sub> linker and (d) FLPs formed between the O atoms of the OCO bridges and the -BF<sub>2</sub> groups on the linker to which they are attached. The orange line present in all charts indicate the Fermi Level, with a value of  $-4.63$  eV.

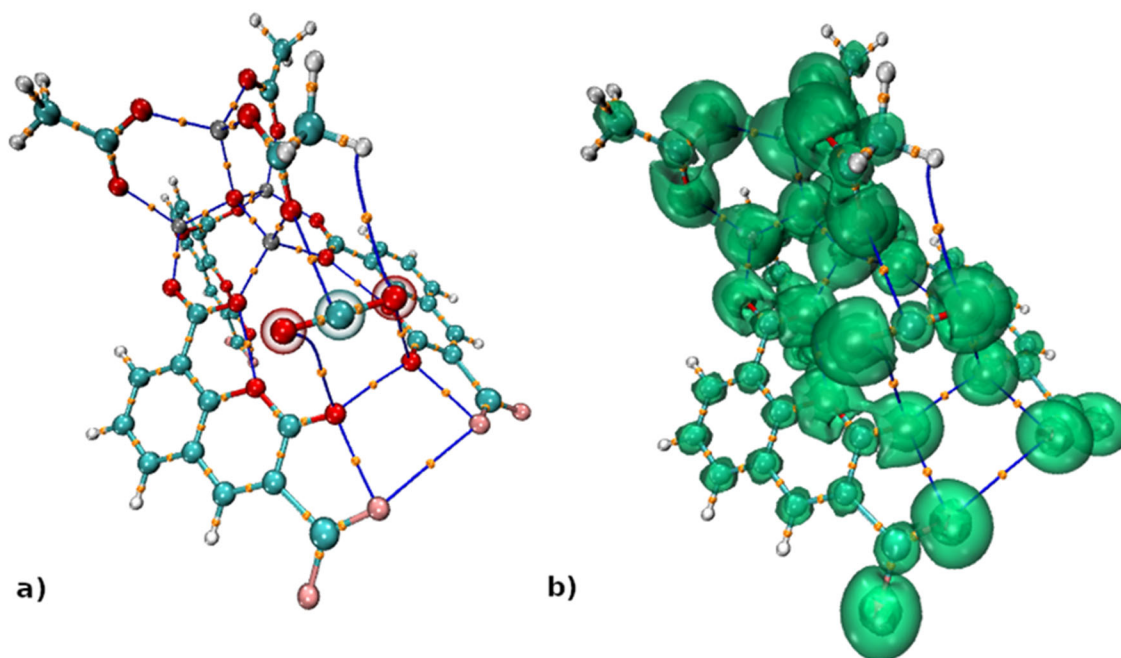

**Figure SI-9.** a) Electron density topologies for IRMOF-C-BF<sub>2</sub>...CO<sub>2</sub>. Bond critical points (BCP) are shown in orange, paths are shown in blue. b) Laplacian of electron density isosurface in green (isovalue 0.3 a.u.).

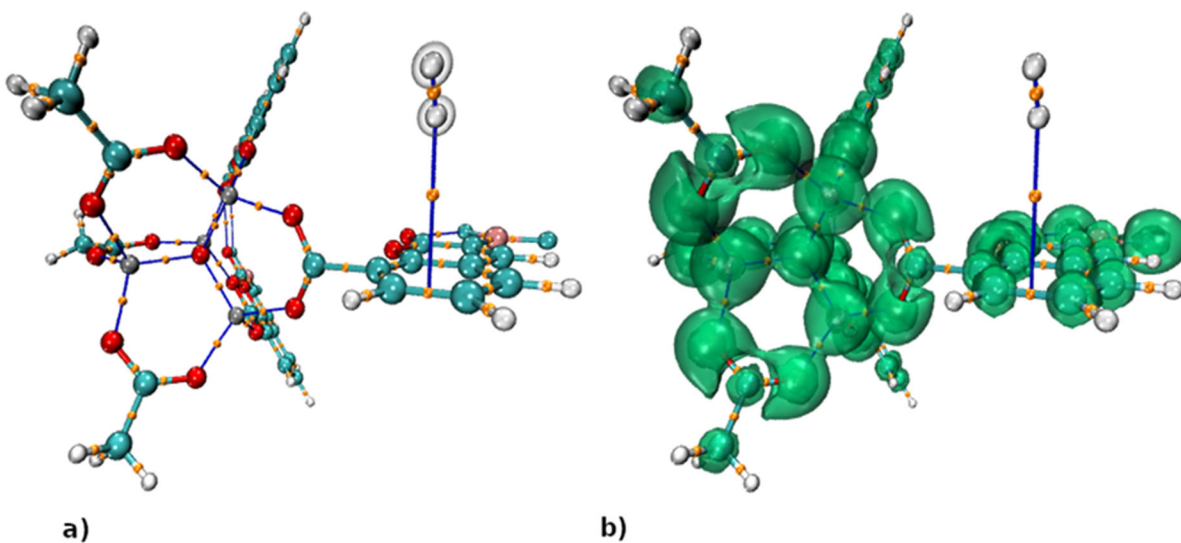

**Figure SI-10.** a) Electron density topologies for IRMOF-C-BF<sub>2</sub>...H<sub>2</sub>. Bond critical points (BCP) are shown in orange, paths are shown in blue. b) Laplacian of electron density isosurface in green (isovalue 0.3 a.u.).

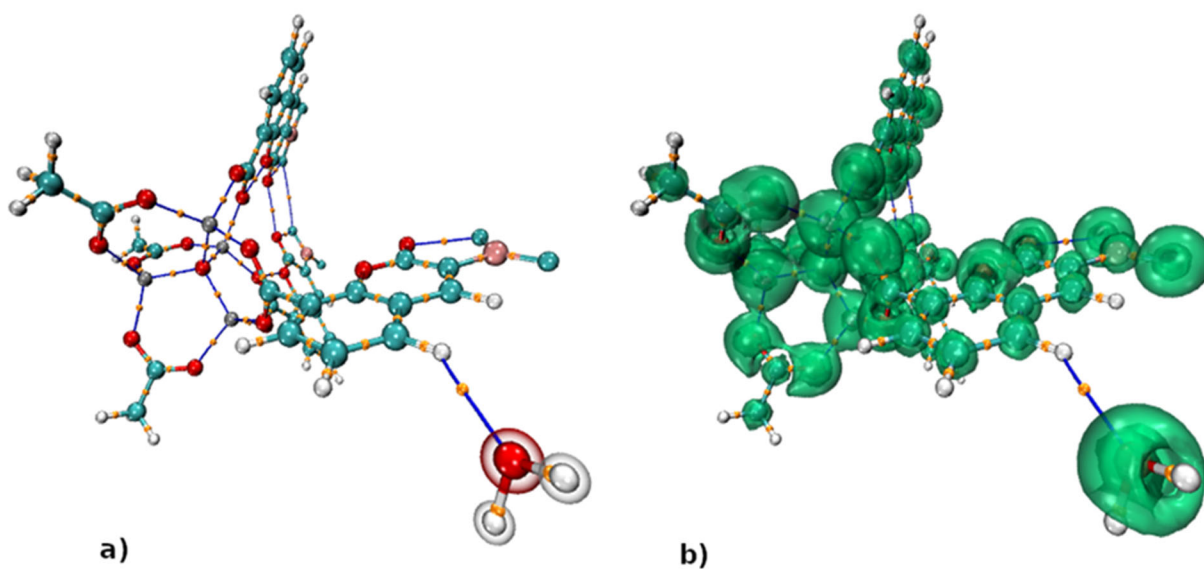

**Figure SI-11.** a) Electron density topologies for IRMOF-C-BF<sub>2</sub>...H<sub>2</sub>O. Bond critical points (BCP) are shown in orange, paths are shown in blue. b) Laplacian of electron density isosurface in green (isovalue 0.3 a.u.).

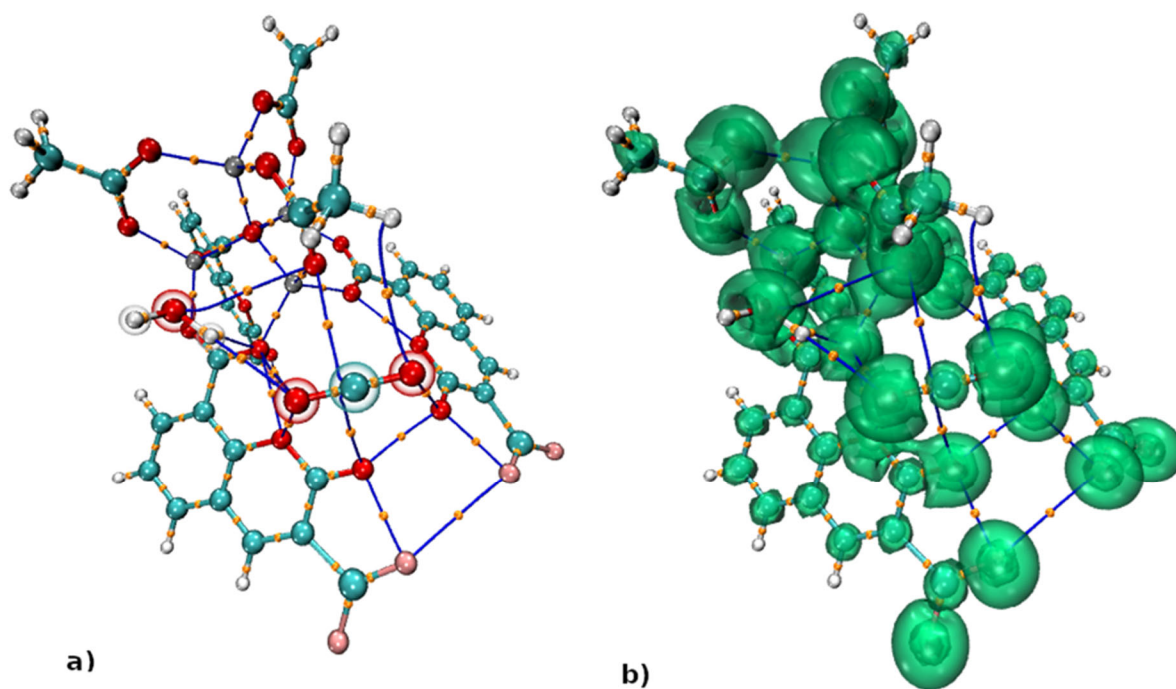

**Figure SI-12.** a) Electron density topologies for IRMOF-C-BF<sub>2</sub>---CO<sub>2</sub> H<sub>2</sub>O. Bond critical points (BCP) are shown in orange, paths are shown in blue. b) Laplacian of electron density isosurface in green (isovalue 0.3 a.u.).

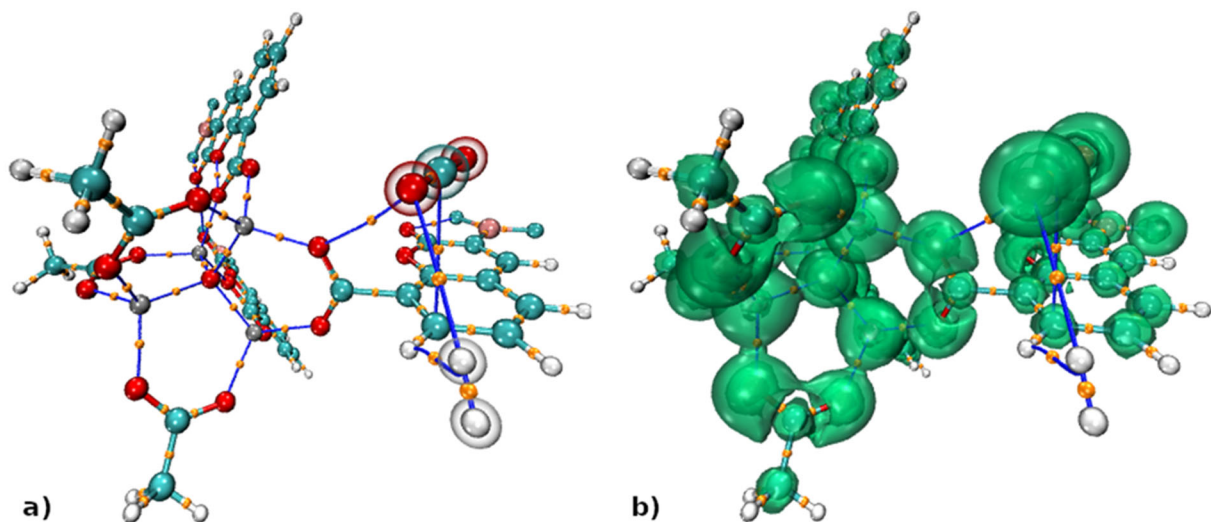

**Figure SI-13.** a) Electron density topologies for IRMOF-C-BF<sub>2</sub>---H<sub>2</sub> CO<sub>2</sub>. Bond critical points (BCP) are shown in orange, paths are shown in blue. b) Laplacian of electron density isosurface in green (isovalued at 0.3 a.u.).

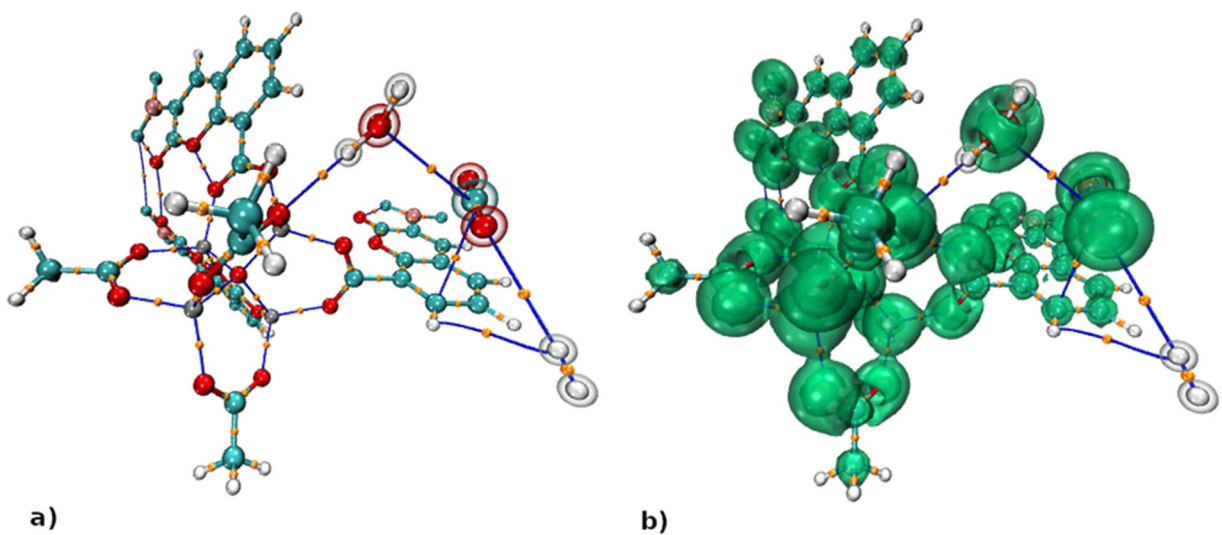

**Figure SI-14.** a) Electron density topologies for IRMOF-C-BF<sub>2</sub>---H<sub>2</sub> CO<sub>2</sub> H<sub>2</sub>O. Bond critical points (BCP) are shown in orange, paths are shown in blue. b) Laplacian of electron density isosurface in green (isovalued at 0.3 a.u.).

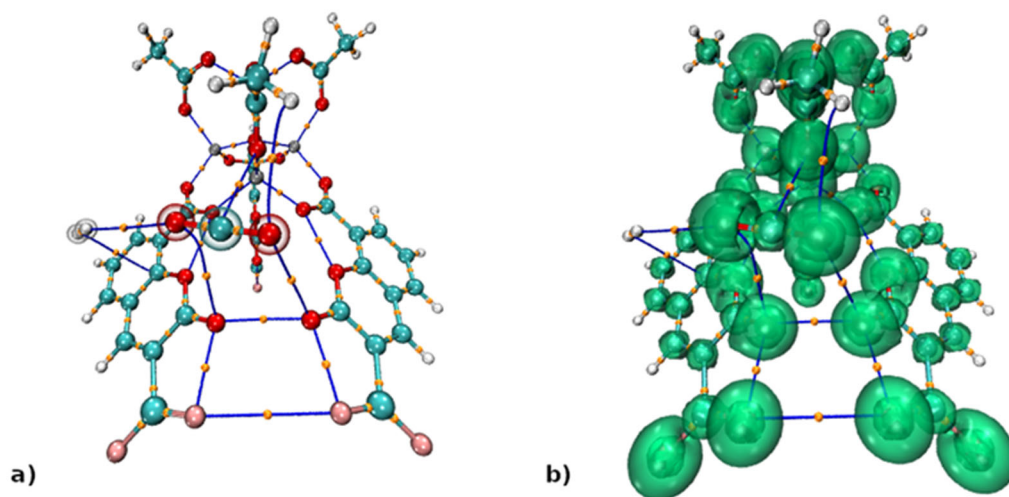

**Figure SI-15.** a) Electron density topologies for IRMOF-C-BF<sub>2</sub>---CO<sub>2</sub> H<sub>2</sub>. Bond critical points (BCP) are shown in orange, paths are shown in blue. b) Laplacian of electron density isosurface in green (isovalue 0.3 a.u.).

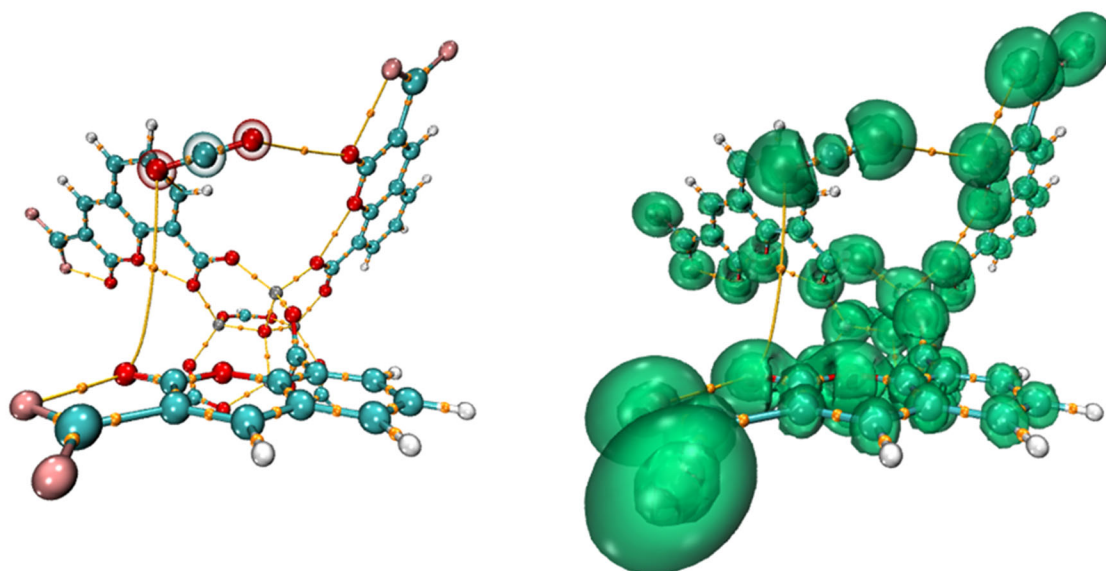

**Figure SI-16.** a) Electron density topologies for IRMOF-C-BF<sub>2</sub> unit cell CO<sub>2</sub>. Bond critical points (BCP) are shown in orange, paths are shown in blue. b) Laplacian of electron density isosurface in green (isovalue 0.3 a.u.).



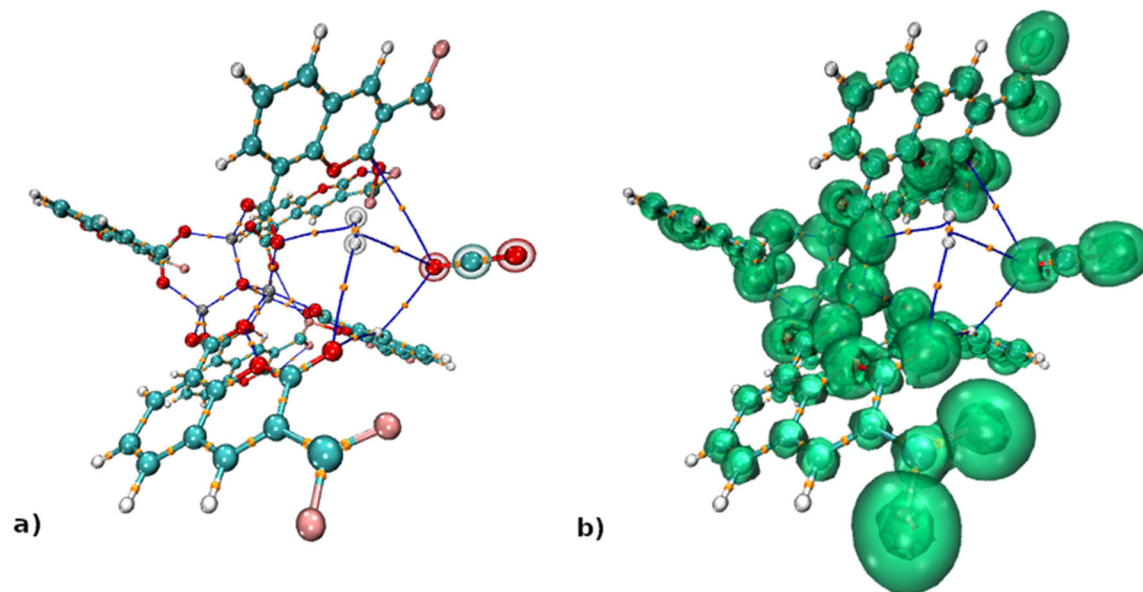

**Figure SI-17.** a) Electron density topologies for IRMOF-C-BF<sub>2</sub> unit cell CO<sub>2</sub> and H<sub>2</sub>. Bond critical points (BCP) are shown in orange, paths are shown in blue. b) Laplacian of electron density isosurface in green (isovalue 0.3 a.u.).

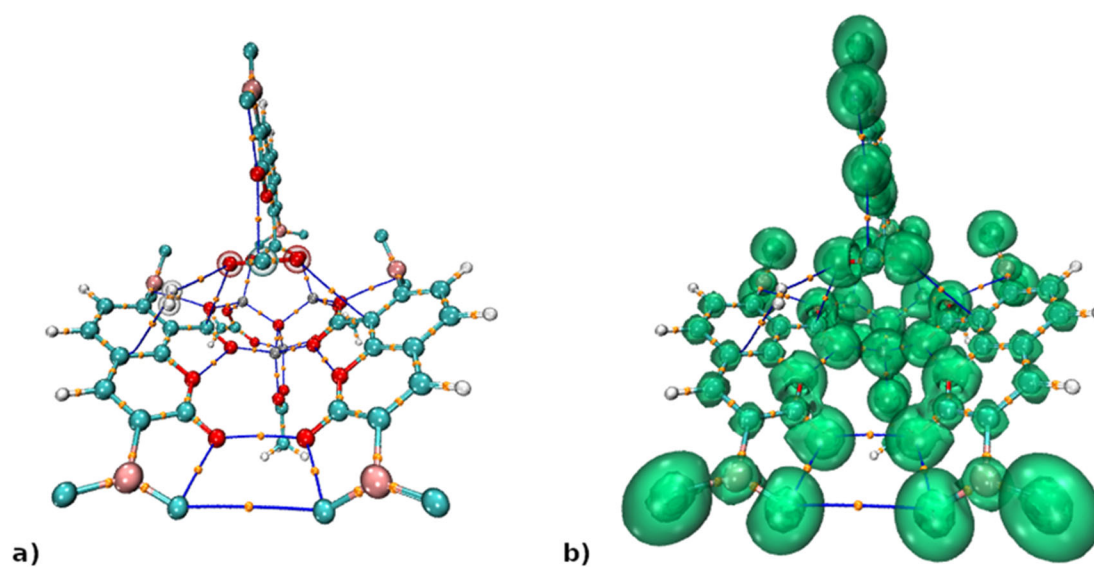

**Figure SI-18.** a) Electron density topologies for IRMOF-C-(2)-BF<sub>2</sub> unit cell CO<sub>2</sub> and H<sub>2</sub>. Bond critical points (BCP) are shown in orange, paths are shown in blue. b) Laplacian of electron density isosurface in green (isovalue 0.3 a.u.).

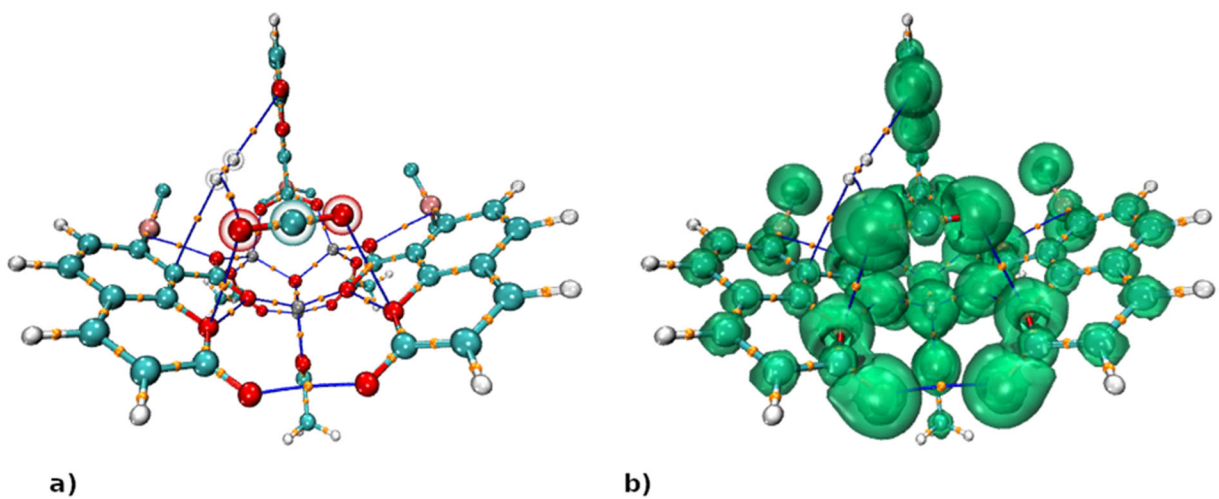

**Figure SI-19.** a) Electron density topologies for IRMOF-C'-BF<sub>2</sub>---H<sub>2</sub> CO<sub>2</sub>. Bond critical points (BCP) are shown in orange, paths are shown in blue. b) Laplacian of electron density isosurface in green (isovalued 0.3 a.u.).

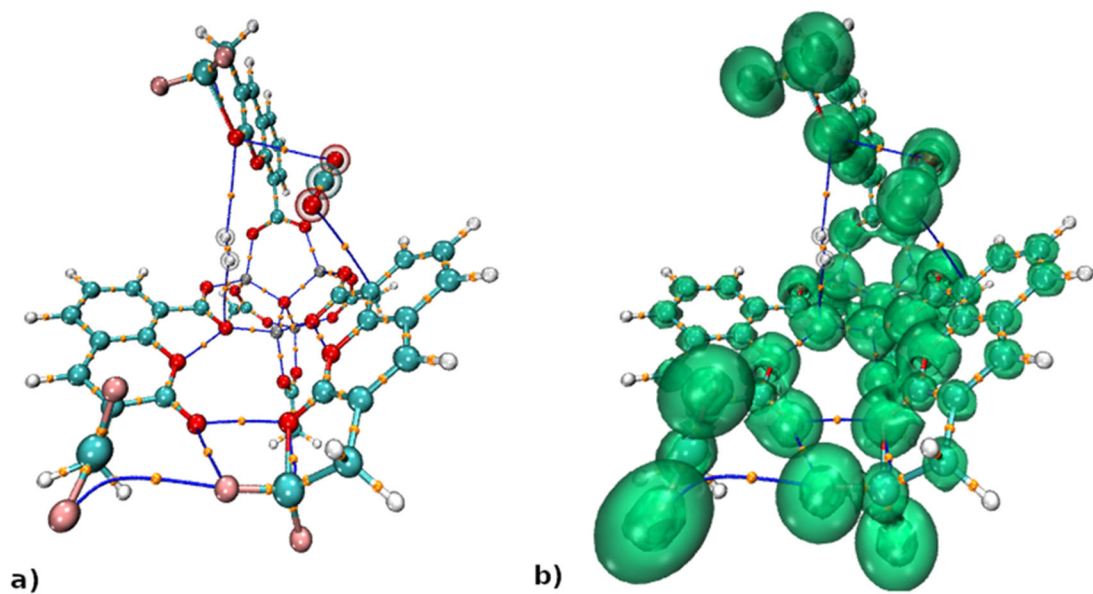

**Figure SI-20.** a) Electron density topologies for IRMOF-C-CH<sub>2</sub>BF<sub>2</sub>---CO<sub>2</sub> H<sub>2</sub>. Bond critical points (BCP) are shown in orange, paths are shown in blue. b) Laplacian of electron density isosurface in green (isovalued 0.3 a.u.).



**Table SI-1.** Analysis of Quantum Theory Atoms in Molecules for hydrogen bonds. Distances d(H—O) in angstroms (Å), angles in degrees. The electron density  $\rho$  ( $e \text{ Å}^{-3}$ ), its Laplacian  $\nabla^2\rho$  ( $e \text{ Å}^{-5}$ ) and the curvature  $\lambda_3$  ( $e \text{ Å}^{-5}$ ), and kinetic energy density (G) in kJ/mol, are the observed values at the (3, -1) CPs of the H---O interactions.

| Structure                                                                  | Guest                              | Angle  | d(H—O) | $\rho$ | $\nabla^2\rho$ | G    | $\lambda_3$ |
|----------------------------------------------------------------------------|------------------------------------|--------|--------|--------|----------------|------|-------------|
| IRMOF-C-BF <sub>2</sub> ...H <sub>2</sub> O                                | H <sub>2</sub> O                   | 144.07 | 2.32   | 1.17   | 4.26           | 23.6 | 6.6         |
| IRMOF-C-BF <sub>2</sub> ...CO <sub>2</sub> H <sub>2</sub> O                | CO <sub>2</sub>                    | 116.54 | 2.99   | 0.37   | 1.35           | 7.2  | 1.8         |
| IRMOF-C-BF <sub>2</sub> ...CO <sub>2</sub> H <sub>2</sub> O                | H <sub>H2O</sub> -O <sub>CO2</sub> | 169.24 | 2.34   | 0.85   | 3.25           | 17.3 | 4.9         |
| IRMOF-C-BF <sub>2</sub> ...H <sub>2</sub> CO <sub>2</sub> H <sub>2</sub> O | H <sub>2</sub> O                   | 163.80 | 2.03   | 1.88   | 7.68           | 43.3 | 12.2        |
| IRMOF-C-BF <sub>2</sub> ...H <sub>2</sub> CO <sub>2</sub> H <sub>2</sub> O | H <sub>H2</sub> -O <sub>CO2</sub>  | 174.57 | 2.82   | 0.37   | 1.32           | 7.2  | 1.9         |
| IRMOF-C-BF <sub>2</sub> ...H <sub>2</sub> CO <sub>2</sub>                  | H <sub>H2</sub> -O <sub>CO2</sub>  | 164.35 | 2.9    | 0.32   | 1.16           | 6.3  | 1.7         |
| IRMOF-C-BF <sub>2</sub> ...CO <sub>2</sub> H <sub>2</sub>                  | H <sub>H2</sub> -O <sub>CO2</sub>  | 157.24 | 3.16   | 0.16   | 0.71           | 3.5  | 1.0         |
| IRMOF-C-BF <sub>2</sub> ...CO <sub>2</sub> H <sub>2</sub>                  | CO <sub>2</sub>                    | 120.72 | 2.97   | 0.38   | 1.35           | 7.2  | 1.8         |
| IRMOF-C-BF <sub>2</sub> unit cell CO <sub>2</sub> H <sub>2</sub>           | CO <sub>2</sub>                    | 114.96 | 2.93   | 0.30   | 1.23           | 6.4  | 1.6         |
| IRMOF-C-BF <sub>2</sub> unit cell CO <sub>2</sub> H <sub>2</sub>           | H <sub>2</sub>                     | 170.50 | 2.93   | 0.28   | 1.04           | 5.6  | 1.5         |
| IRMOF-C-BF <sub>2</sub> unit cell CO <sub>2</sub> H <sub>2</sub>           | H <sub>2</sub>                     | 91.58  | 3.43   | 0.14   | 0.64           | 2.9  | 0.8         |
| IRMOF-C-BF <sub>2</sub> unit cell CO <sub>2</sub> H <sub>2</sub>           | H <sub>H2</sub> -O <sub>CO2</sub>  | 89.14  | 3.4    | 0.17   | 0.74           | 3.5  | 1.0         |
| IRMOF-C'-BF <sub>2</sub>                                                   | H <sub>2</sub>                     | 172.13 | 2.71   | 0.52   | 1.68           | 9.4  | 2.6         |
| IRMOF-C'-BF <sub>2</sub>                                                   | H <sub>H2</sub> -O <sub>CO2</sub>  | 112.87 | 3.12   | 0.27   | 1.03           | 5.2  | 1.4         |
| IRMOF-C-(2)-BF <sub>2</sub>                                                | H <sub>2</sub>                     | 141.45 | 2.81   | 0.43   | 1.47           | 8.1  | 2.2         |
| IRMOF-C-CH <sub>2</sub> BF <sub>2</sub> ...H <sub>2</sub> CO <sub>2</sub>  | H <sub>2</sub>                     | 162.43 | 3.13   | 0.22   | 0.86           | 4.3  | 1.2         |
| IRMOF-C-CH <sub>2</sub> BF <sub>2</sub> ...H <sub>2</sub> CO <sub>2</sub>  | H <sub>2</sub>                     | 135.92 | 2.92   | 0.43   | 1.43           | 7.7  | 2.0         |
| IRMOF-C-CH <sub>2</sub> BF <sub>2</sub> ...H <sub>2</sub> CO <sub>2</sub>  | H <sub>2</sub>                     | 133.92 | 3.47   | 0.13   | 0.55           | 2.5  | 0.6         |
| IRMOF-C-CH <sub>2</sub> BF <sub>2</sub> ...H <sub>2</sub> CO <sub>2</sub>  | H <sub>H2</sub> -O <sub>CO2</sub>  | 90.48  | 3.32   | 0.20   | 0.86           | 4.1  | 1.1         |

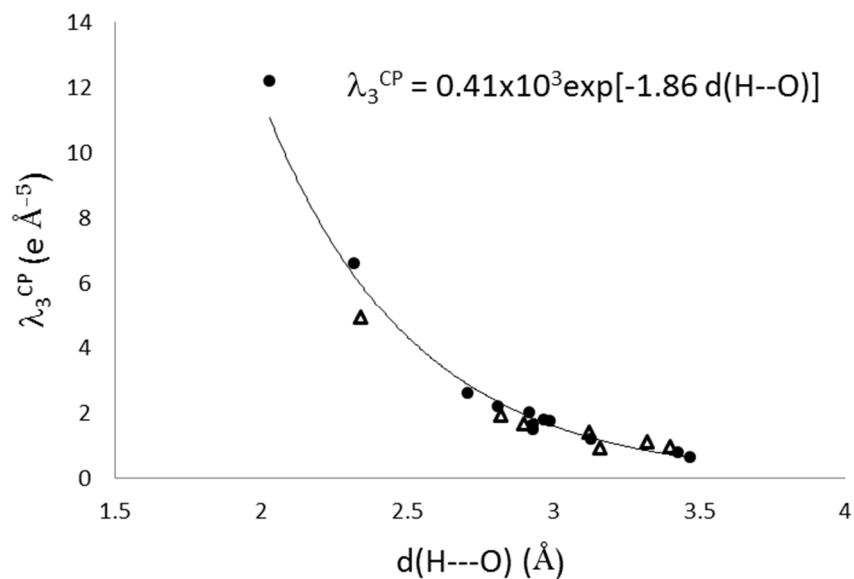

**Figure SI-21.** Behavior of  $\lambda_3^{\text{CP}}$  versus  $d(\text{H} \cdots \text{O})$ . Dots are for hydrogen bonds between MOF's and guest molecules. Triangles are for hydrogen bonds between guest molecules.

The xyz-coordinates of the geometries for the optimized molecules are listed below.

**Figure1**

74

|    |             |             |             |
|----|-------------|-------------|-------------|
| Zn | 1.12016501  | -1.12325149 | -1.12019609 |
| Zn | 1.12037274  | 1.11972698  | 1.12078807  |
| Zn | -1.12081915 | 1.11972699  | -1.12034163 |
| Zn | -1.12229905 | -1.12151003 | 1.12233020  |
| O  | 0.00000000  | 0.00000000  | 0.00000000  |
| O  | 3.01100604  | -0.80403632 | -0.80147751 |
| O  | 3.01099823  | 0.80067974  | 0.80186059  |
| O  | 0.80139398  | -0.80403632 | -3.01102828 |
| O  | -0.80194414 | 0.80067974  | -3.01097599 |
| O  | -0.80157825 | 3.01062611  | -0.80143281 |
| O  | 0.80182977  | 0.80167246  | 3.01181160  |
| O  | -3.01343636 | -0.80247816 | 0.80236640  |
| O  | -3.01183385 | 0.80167246  | -0.80174622 |
| O  | -0.80228277 | -0.80247816 | 3.01345863  |
| O  | 0.80145506  | 3.01062611  | 0.80155601  |
| O  | -0.80250062 | -3.01519368 | 0.80252290  |
| O  | 0.80081161  | -3.01458210 | -0.80083384 |

|   |             |             |             |
|---|-------------|-------------|-------------|
| O | 1.70360822  | 1.70795132  | 5.08278285  |
| O | 3.28393460  | 3.28974847  | 5.11642038  |
| O | 1.70373736  | 5.07982997  | -1.70378462 |
| O | 3.28476597  | 5.11421132  | -3.28485710 |
| O | 5.08366535  | -1.70207366 | -1.70688627 |
| O | 5.11809784  | -3.28320068 | -3.28786852 |
| B | 3.63740627  | 3.64500347  | 7.80127747  |
| B | 7.80313857  | -3.63559902 | -3.64285075 |
| B | 3.63850564  | 7.79923490  | -3.63860660 |
| C | 0.84306920  | 0.84777862  | 7.16872225  |
| C | -0.86386200 | -0.86072238 | 7.16559590  |
| C | 2.54272198  | 2.54819268  | 5.73887214  |
| C | 0.84605435  | 0.85000761  | 5.77821867  |
| C | -0.86330397 | -0.86091828 | 5.77515774  |
| C | -0.00746748 | -0.00469948 | 5.07589556  |
| C | -0.00000543 | -0.00012993 | 3.58358746  |
| C | -0.00028013 | -0.00165413 | -3.58193008 |
| C | 0.03062197  | 5.19480361  | -0.03062282 |
| C | -0.86429207 | 5.77099820  | 0.86431603  |
| C | -0.86479058 | 7.16144140  | 0.86481455  |
| C | -0.01167845 | 7.85967882  | 0.01167877  |
| C | 0.84316968  | 7.16520783  | -0.84319308 |
| C | 0.84582712  | 5.77486441  | -0.84585059 |
| C | -3.58358746 | -0.00012992 | 0.00010487  |
| C | 2.54324950  | 5.73632012  | -2.54332007 |
| C | 2.55563196  | 7.13583776  | -2.55570286 |
| C | 1.70545382  | 7.85019549  | -1.70550114 |
| C | -0.00082649 | -3.58526143 | 0.00082652  |
| C | 7.85400170  | -1.70239656 | -1.70988556 |
| C | 7.86344708  | 0.01486356  | 0.00715053  |
| C | 7.13967791  | -2.55318744 | -2.55989597 |
| C | 7.16916337  | -0.84012436 | -0.84706112 |
| C | 7.16516191  | 0.86767222  | 0.86056816  |
| C | 5.74017313  | -2.54131957 | -2.54666858 |
| C | 5.77865774  | -0.84376092 | -0.84933860 |
| C | 5.77472794  | 0.86645623  | 0.86070808  |
| C | 5.07589098  | 0.00986633  | 0.00489790  |
| C | -0.00000000 | 3.58140162  | -0.00000000 |
| C | 3.58193010  | -0.00165412 | 0.00018075  |
| C | 2.55525160  | 2.56147944  | 7.13836914  |
| C | 1.70521779  | 1.71108139  | 7.85315513  |
| C | -0.01114850 | -0.00684860 | 7.86343812  |
| F | 9.21264276  | -3.64778237 | -3.65641860 |
| F | 4.37340043  | 6.84761056  | -4.37352178 |
| F | 3.65140408  | 9.20873936  | -3.65150538 |
| F | 3.65025117  | 3.65863745  | 9.21078313  |
| F | 4.37201919  | 4.37976460  | 6.84931897  |
| F | 6.85154831  | -4.37102993 | -4.37726874 |

|   |             |             |             |
|---|-------------|-------------|-------------|
| H | 1.71519826  | 1.72166619  | 8.94691269  |
| H | -1.53255007 | -1.53107667 | 5.22770105  |
| H | -1.53384198 | 5.22322853  | 1.53388453  |
| H | 8.94779591  | -1.71185866 | -1.72044994 |
| H | -1.52796471 | -1.52510128 | 7.72586987  |
| H | 7.72509852  | 1.53236341  | 1.52463485  |
| H | 5.22692664  | 1.53578990  | 1.53050218  |
| H | 1.71547337  | 8.94397379  | -1.71552096 |
| H | -1.52915428 | 7.72140783  | 1.52919671  |

## Figure2

89

|    |             |             |             |
|----|-------------|-------------|-------------|
| Zn | 1.11832588  | -1.12823526 | 1.11702073  |
| O  | 0.00000000  | 0.00000000  | 0.00000000  |
| Zn | -1.11690035 | 1.12047199  | 1.12350596  |
| Zn | 1.12219395  | 1.11897262  | -1.11971895 |
| Zn | -1.12621595 | -1.11650539 | -1.12339591 |
| O  | 0.80213697  | -0.81178373 | 3.00875080  |
| C  | 0.00305483  | -0.00843257 | 3.58191925  |
| O  | -0.79708182 | 0.79703132  | 3.01323421  |
| C  | 3.58191236  | -0.01082909 | -0.00354043 |
| O  | 3.00968100  | -0.81326198 | 0.79713438  |
| O  | 3.01229190  | 0.79448044  | -0.80316691 |
| C  | 0.00918028  | 3.58138347  | 0.00676958  |
| O  | 0.80842204  | 3.01007489  | -0.79661456 |
| O  | -3.00902029 | 0.80786599  | 0.80608208  |
| C  | -0.00334651 | 0.00665239  | -3.58357973 |
| O  | -0.80714607 | -0.79471572 | -3.01421696 |
| O  | 0.80107402  | 0.80531462  | -3.01104096 |
| C  | -3.58357456 | 0.00904983  | 0.00325300  |
| O  | -3.01623017 | -0.79323645 | -0.80105763 |
| O  | -0.79311094 | 3.01114733  | 0.80787288  |
| C  | -0.01001744 | -3.58523958 | -0.00760262 |
| O  | -0.81097469 | -3.01160387 | -0.80746843 |
| O  | 0.79382786  | -3.01813380 | 0.79438345  |
| C  | -0.00571474 | -5.07589619 | -0.00231149 |
| H  | 8.94497845  | -1.73802636 | 1.70882553  |
| C  | 7.16655713  | 0.85094258  | -0.86564050 |
| B  | 7.79718631  | -3.66246319 | 3.62865844  |
| C  | -4.98356264 | 0.00836246  | -0.00248239 |
| C  | 5.73601164  | -2.56083027 | 2.53648029  |
| C  | 5.77726518  | -0.86016645 | 0.84232676  |
| H  | 7.72757640  | 1.51545290  | -1.52897402 |
| H  | 5.22941714  | 1.52528967  | -1.53249386 |
| C  | 5.77612508  | 0.85328853  | -0.86447976 |
| F  | 6.84439910  | -4.39684279 | 4.36257641  |

|   |             |             |             |
|---|-------------|-------------|-------------|
| F | 9.20666666  | -3.67828270 | 3.64088242  |
| C | -0.01166294 | 0.00503311  | -4.98355409 |
| C | 5.07589281  | -0.00312662 | -0.00963575 |
| H | 8.95732133  | -0.01270863 | -0.00982188 |
| C | 7.16777284  | -0.86008744 | 0.83875315  |
| C | 7.85120270  | -1.72574250 | 1.69930405  |
| C | 7.86344925  | -0.00526563 | -0.01449110 |
| C | 0.04396636  | 5.19464087  | 0.04041330  |
| C | -0.85030166 | 5.77481866  | -0.85259583 |
| C | -0.84723648 | 7.16525704  | -0.85046567 |
| C | 0.00845759  | 7.85969098  | 0.00318860  |
| C | 0.86231933  | 7.16141583  | 0.85594479  |
| C | 0.86141534  | 5.77106764  | 0.85597177  |
| O | 1.71834058  | 5.07221542  | 1.71178622  |
| C | 2.56031505  | 5.72496288  | 2.55177400  |
| C | 2.57629640  | 7.12441826  | 2.56679053  |
| C | 1.72715998  | 7.84255923  | 1.71873767  |
| O | 3.30092537  | 5.09955437  | 3.29143861  |
| B | 3.66187609  | 7.78298868  | 3.64993108  |
| F | 4.39501394  | 6.82809579  | 4.38235721  |
| F | 3.67839951  | 9.19242854  | 3.66548201  |
| H | -1.52187739 | 5.23003409  | -1.52257081 |
| H | -1.51078171 | 7.72817984  | -1.51316532 |
| H | 0.01644550  | 8.95356000  | 0.01043066  |
| H | 1.73999253  | 8.93628735  | 1.73081555  |
| C | 1.71261932  | -1.72163191 | 7.84921168  |
| C | 0.00000000  | 0.00000000  | 7.86346437  |
| C | 2.55979964  | -2.57324399 | 7.13250833  |
| C | 0.85138892  | -0.85585778 | 7.16678932  |
| C | -0.85186005 | 0.85631198  | 7.16756877  |
| C | 2.54533688  | -2.55869369 | 5.73304110  |
| C | 0.85239936  | -0.85686860 | 5.77627780  |
| C | -0.85326071 | 0.85772779  | 5.77713568  |
| C | -0.00028150 | 0.00027256  | 5.07590291  |
| O | 1.70711511  | -1.71605838 | 5.07888476  |
| O | 3.28406975  | -3.30129242 | 5.10889086  |
| H | 1.72414872  | -1.73319106 | 8.94297600  |
| H | 0.00668056  | -0.00671498 | 8.95733072  |
| B | 3.64057594  | -3.65967980 | 7.79293680  |
| H | -1.51371401 | 1.52164117  | 7.72936440  |
| H | -1.52183211 | 1.52981054  | 5.23120984  |
| F | 4.37224537  | -4.39518736 | 6.83929068  |
| F | 3.65538739  | -3.67456539 | 9.20240250  |
| O | 5.08087469  | -1.71831757 | 1.69890139  |
| O | 5.11272795  | -3.30251694 | 3.27685922  |
| C | 7.13549312  | -2.57630803 | 2.54837377  |
| H | 0.87743529  | -5.53817138 | -0.41794072 |
| H | -0.88618997 | -5.54326193 | -0.41792265 |

|   |             |             |             |
|---|-------------|-------------|-------------|
| H | -0.00467563 | -5.43227820 | 1.01719368  |
| H | -5.33938817 | 0.00818571  | -1.02218243 |
| H | 0.86749114  | 0.44073250  | -5.43483467 |
| H | -5.43045891 | -0.87367249 | 0.43191152  |
| H | -0.01380144 | -1.01361636 | -5.34236976 |
| H | -5.43132480 | 0.88995991  | 0.43190797  |
| H | -0.89611036 | 0.44074462  | -5.42435816 |

**Figure9\_a**

92

|    |             |             |             |
|----|-------------|-------------|-------------|
| Zn | 1.11832588  | -1.12823526 | 1.11702073  |
| O  | 0.00000000  | 0.00000000  | 0.00000000  |
| Zn | -1.11690035 | 1.12047199  | 1.12350596  |
| Zn | 1.12219394  | 1.11897262  | -1.11971895 |
| Zn | -1.12621595 | -1.11650539 | -1.12339591 |
| O  | 0.80213697  | -0.81178373 | 3.00875080  |
| C  | 0.00305483  | -0.00843257 | 3.58191925  |
| O  | -0.79708182 | 0.79703132  | 3.01323421  |
| C  | 3.58191236  | -0.01082909 | -0.00354043 |
| O  | 3.00968100  | -0.81326198 | 0.79713438  |
| O  | 3.01229190  | 0.79448044  | -0.80316691 |
| C  | 0.00918028  | 3.58138347  | 0.00676958  |
| O  | 0.80842204  | 3.01007489  | -0.79661456 |
| O  | -3.00902029 | 0.80786599  | 0.80608208  |
| C  | -0.00334651 | 0.00665239  | -3.58357973 |
| O  | -0.80714607 | -0.79471572 | -3.01421696 |
| O  | 0.80107402  | 0.80531462  | -3.01104096 |
| C  | -3.58357456 | 0.00904983  | 0.00325300  |
| O  | -3.01623016 | -0.79323645 | -0.80105763 |
| O  | -0.79311094 | 3.01114733  | 0.80787288  |
| C  | -0.01001744 | -3.58523958 | -0.00760262 |
| O  | -0.81097469 | -3.01160387 | -0.80746843 |
| O  | 0.79382786  | -3.01813380 | 0.79438345  |
| C  | -0.00571474 | -5.07589619 | -0.00231149 |
| H  | 8.94497845  | -1.73802636 | 1.70882553  |
| C  | 7.16655713  | 0.85094258  | -0.86564050 |
| B  | 7.79718631  | -3.66246319 | 3.62865844  |
| C  | -4.98356264 | 0.00836246  | -0.00248239 |
| C  | 5.73601164  | -2.56083027 | 2.53648029  |
| C  | 5.77726518  | -0.86016645 | 0.84232676  |
| H  | 7.72757640  | 1.51545290  | -1.52897402 |
| H  | 5.22941714  | 1.52528967  | -1.53249386 |
| C  | 5.77612508  | 0.85328853  | -0.86447976 |
| F  | 6.84439910  | -4.39684279 | 4.36257641  |
| F  | 9.20666666  | -3.67828270 | 3.64088242  |
| C  | -0.01166294 | 0.00503311  | -4.98355409 |

|   |             |             |             |
|---|-------------|-------------|-------------|
| C | 5.07589281  | -0.00312662 | -0.00963575 |
| H | 8.95732133  | -0.01270863 | -0.00982188 |
| C | 7.16777284  | -0.86008744 | 0.83875315  |
| C | 7.85120270  | -1.72574250 | 1.69930404  |
| C | 7.86344925  | -0.00526563 | -0.01449110 |
| C | 0.04396636  | 5.19464087  | 0.04041330  |
| C | -0.85030166 | 5.77481866  | -0.85259583 |
| C | -0.84723648 | 7.16525704  | -0.85046567 |
| C | 0.00845759  | 7.85969098  | 0.00318860  |
| C | 0.86231933  | 7.16141583  | 0.85594479  |
| C | 0.86141534  | 5.77106764  | 0.85597177  |
| O | 1.71834058  | 5.07221542  | 1.71178622  |
| C | 2.56031505  | 5.72496288  | 2.55177400  |
| C | 2.57629640  | 7.12441826  | 2.56679053  |
| C | 1.72715998  | 7.84255923  | 1.71873767  |
| O | 3.30092537  | 5.09955437  | 3.29143861  |
| B | 3.66187609  | 7.78298868  | 3.64993108  |
| F | 4.39501394  | 6.82809579  | 4.38235721  |
| F | 3.67839951  | 9.19242854  | 3.66548201  |
| H | -1.52187739 | 5.23003409  | -1.52257081 |
| H | -1.51078171 | 7.72817984  | -1.51316532 |
| H | 0.01644550  | 8.95356000  | 0.01043066  |
| H | 1.73999253  | 8.93628735  | 1.73081555  |
| C | 1.71261932  | -1.72163191 | 7.84921168  |
| C | 0.00000000  | 0.00000000  | 7.86346437  |
| C | 2.55979964  | -2.57324399 | 7.13250833  |
| C | 0.85138892  | -0.85585778 | 7.16678932  |
| C | -0.85186005 | 0.85631198  | 7.16756877  |
| C | 2.54533688  | -2.55869369 | 5.73304110  |
| C | 0.85239936  | -0.85686860 | 5.77627780  |
| C | -0.85326071 | 0.85772779  | 5.77713568  |
| C | -0.00028150 | 0.00027256  | 5.07590291  |
| O | 1.70711511  | -1.71605838 | 5.07888476  |
| O | 3.28406975  | -3.30129242 | 5.10889086  |
| H | 1.72414872  | -1.73319106 | 8.94297600  |
| H | 0.00668056  | -0.00671498 | 8.95733072  |
| B | 3.64057594  | -3.65967980 | 7.79293679  |
| H | -1.51371400 | 1.52164117  | 7.72936440  |
| H | -1.52183211 | 1.52981054  | 5.23120984  |
| F | 4.37224537  | -4.39518736 | 6.83929068  |
| F | 3.65538739  | -3.67456539 | 9.20240250  |
| O | 5.08087469  | -1.71831757 | 1.69890138  |
| O | 5.11272795  | -3.30251694 | 3.27685922  |
| C | 7.13549312  | -2.57630803 | 2.54837377  |
| C | 2.93841364  | -4.97687723 | 1.86860666  |
| O | 3.63364160  | -4.70078713 | 0.96587711  |
| O | 2.25068866  | -5.27280136 | 2.76974291  |
| H | -5.33938817 | 0.00818571  | -1.02218243 |



|   |             |             |             |
|---|-------------|-------------|-------------|
| H | 0.86749114  | 0.44073250  | -5.43483467 |
| H | -5.43045891 | -0.87367249 | 0.43191152  |
| H | -0.01380144 | -1.01361636 | -5.34236976 |
| H | -5.43132480 | 0.88995991  | 0.43190797  |
| H | -0.89611036 | 0.44074462  | -5.42435816 |
| H | 0.87743529  | -5.53817138 | -0.41794072 |
| H | -0.88618997 | -5.54326193 | -0.41792265 |
| H | -0.00467563 | -5.43227820 | 1.01719368  |

# Figure9\_b

91

|    |             |             |             |
|----|-------------|-------------|-------------|
| Zn | 1.11832588  | -1.12823526 | 1.11702073  |
| O  | 0.00000000  | 0.00000000  | 0.00000000  |
| Zn | -1.11690035 | 1.12047199  | 1.12350596  |
| Zn | 1.12219394  | 1.11897262  | -1.11971895 |
| Zn | -1.12621595 | -1.11650539 | -1.12339591 |
| O  | 0.80213697  | -0.81178373 | 3.00875080  |
| C  | 0.00305483  | -0.00843257 | 3.58191925  |
| O  | -0.79708182 | 0.79703132  | 3.01323421  |
| C  | 3.58191236  | -0.01082909 | -0.00354043 |
| O  | 3.00968100  | -0.81326198 | 0.79713438  |
| O  | 3.01229190  | 0.79448044  | -0.80316691 |
| C  | 0.00918028  | 3.58138347  | 0.00676958  |
| O  | 0.80842204  | 3.01007489  | -0.79661456 |
| O  | -3.00902029 | 0.80786599  | 0.80608208  |
| C  | -0.00334651 | 0.00665239  | -3.58357973 |
| O  | -0.80714607 | -0.79471572 | -3.01421696 |
| O  | 0.80107402  | 0.80531462  | -3.01104096 |
| C  | -3.58357456 | 0.00904983  | 0.00325300  |
| O  | -3.01623016 | -0.79323645 | -0.80105763 |
| O  | -0.79311094 | 3.01114733  | 0.80787288  |
| C  | -0.01001744 | -3.58523958 | -0.00760262 |
| O  | -0.81097469 | -3.01160387 | -0.80746843 |
| O  | 0.79382786  | -3.01813380 | 0.79438345  |
| C  | -0.00571474 | -5.07589619 | -0.00231149 |
| H  | 8.94497845  | -1.73802636 | 1.70882553  |
| C  | 7.16655713  | 0.85094258  | -0.86564050 |
| B  | 7.79718631  | -3.66246319 | 3.62865844  |
| C  | -4.98356264 | 0.00836246  | -0.00248239 |
| C  | 5.73601164  | -2.56083027 | 2.53648029  |
| C  | 5.77726518  | -0.86016645 | 0.84232676  |
| H  | 7.72757640  | 1.51545290  | -1.52897402 |
| H  | 5.22941714  | 1.52528967  | -1.53249386 |
| C  | 5.77612508  | 0.85328853  | -0.86447976 |
| F  | 6.84439910  | -4.39684279 | 4.36257641  |
| F  | 9.20666666  | -3.67828270 | 3.64088242  |

|   |             |             |             |
|---|-------------|-------------|-------------|
| C | -0.01166294 | 0.00503311  | -4.98355409 |
| C | 5.07589281  | -0.00312662 | -0.00963575 |
| H | 8.95732133  | -0.01270863 | -0.00982188 |
| C | 7.16777284  | -0.86008744 | 0.83875315  |
| C | 7.85120270  | -1.72574250 | 1.69930404  |
| C | 7.86344925  | -0.00526563 | -0.01449110 |
| C | 0.04396636  | 5.19464087  | 0.04041330  |
| C | -0.85030166 | 5.77481866  | -0.85259583 |
| C | -0.84723648 | 7.16525704  | -0.85046567 |
| C | 0.00845759  | 7.85969098  | 0.00318860  |
| C | 0.86231933  | 7.16141583  | 0.85594479  |
| C | 0.86141534  | 5.77106764  | 0.85597177  |
| O | 1.71834058  | 5.07221542  | 1.71178622  |
| C | 2.56031505  | 5.72496288  | 2.55177400  |
| C | 2.57629640  | 7.12441826  | 2.56679053  |
| C | 1.72715998  | 7.84255923  | 1.71873767  |
| O | 3.30092537  | 5.09955437  | 3.29143861  |
| B | 3.66187609  | 7.78298868  | 3.64993108  |
| F | 4.39501394  | 6.82809579  | 4.38235721  |
| F | 3.67839951  | 9.19242854  | 3.66548201  |
| H | -1.52187739 | 5.23003409  | -1.52257081 |
| H | -1.51078171 | 7.72817984  | -1.51316532 |
| H | 0.01644550  | 8.95356000  | 0.01043066  |
| H | 1.73999253  | 8.93628735  | 1.73081555  |
| C | 1.71261932  | -1.72163191 | 7.84921168  |
| C | 0.00000000  | 0.00000000  | 7.86346437  |
| C | 2.55979964  | -2.57324399 | 7.13250833  |
| C | 0.85138892  | -0.85585778 | 7.16678932  |
| C | -0.85186005 | 0.85631198  | 7.16756877  |
| C | 2.54533688  | -2.55869369 | 5.73304110  |
| C | 0.85239936  | -0.85686860 | 5.77627780  |
| C | -0.85326071 | 0.85772779  | 5.77713568  |
| C | -0.00028150 | 0.00027256  | 5.07590291  |
| O | 1.70711511  | -1.71605838 | 5.07888476  |
| O | 3.28406975  | -3.30129242 | 5.10889086  |
| H | 1.72414872  | -1.73319106 | 8.94297600  |
| H | 0.00668056  | -0.00671498 | 8.95733072  |
| B | 3.64057594  | -3.65967980 | 7.79293679  |
| H | -1.51371400 | 1.52164117  | 7.72936440  |
| H | -1.52183211 | 1.52981054  | 5.23120984  |
| F | 4.37224537  | -4.39518736 | 6.83929068  |
| F | 3.65538739  | -3.67456539 | 9.20240250  |
| O | 5.08087469  | -1.71831757 | 1.69890138  |
| O | 5.11272795  | -3.30251694 | 3.27685922  |
| C | 7.13549312  | -2.57630803 | 2.54837377  |
| H | 0.87743529  | -5.53817138 | -0.41794072 |
| H | -0.88618997 | -5.54326193 | -0.41792265 |
| H | -0.00467563 | -5.43227820 | 1.01719368  |

|   |             |             |             |
|---|-------------|-------------|-------------|
| H | -5.33938817 | 0.00818571  | -1.02218243 |
| H | 0.86749114  | 0.44073250  | -5.43483467 |
| H | -5.43045891 | -0.87367249 | 0.43191152  |
| H | -0.01380144 | -1.01361636 | -5.34236976 |
| H | -5.43132480 | 0.88995991  | 0.43190797  |
| H | -0.89611036 | 0.44074462  | -5.42435816 |
| H | 0.93193216  | 6.46079504  | -3.20449546 |
| H | 1.09538841  | 6.39684480  | -3.93783079 |

# Figure9\_c

92

|    |             |             |             |
|----|-------------|-------------|-------------|
| Zn | 1.11832588  | -1.12823526 | 1.11702073  |
| O  | 0.00000000  | 0.00000000  | 0.00000000  |
| Zn | -1.11690035 | 1.12047199  | 1.12350596  |
| Zn | 1.12219395  | 1.11897262  | -1.11971895 |
| Zn | -1.12621595 | -1.11650539 | -1.12339591 |
| O  | 0.80213697  | -0.81178373 | 3.00875080  |
| C  | 0.00305483  | -0.00843257 | 3.58191925  |
| O  | -0.79708182 | 0.79703132  | 3.01323421  |
| C  | 3.58191236  | -0.01082909 | -0.00354043 |
| O  | 3.00968100  | -0.81326198 | 0.79713438  |
| O  | 3.01229190  | 0.79448044  | -0.80316691 |
| C  | 0.00918028  | 3.58138347  | 0.00676958  |
| O  | 0.80842204  | 3.01007489  | -0.79661456 |
| O  | -3.00902029 | 0.80786599  | 0.80608208  |
| C  | -0.00334651 | 0.00665239  | -3.58357973 |
| O  | -0.80714607 | -0.79471572 | -3.01421696 |
| O  | 0.80107402  | 0.80531462  | -3.01104096 |
| C  | -3.58357456 | 0.00904983  | 0.00325300  |
| O  | -3.01623017 | -0.79323645 | -0.80105763 |
| O  | -0.79311094 | 3.01114733  | 0.80787288  |
| C  | -0.01001744 | -3.58523958 | -0.00760262 |
| O  | -0.81097469 | -3.01160387 | -0.80746843 |
| O  | 0.79382786  | -3.01813380 | 0.79438345  |
| C  | -0.00571474 | -5.07589619 | -0.00231149 |
| H  | 8.94497845  | -1.73802636 | 1.70882553  |
| C  | 7.16655713  | 0.85094258  | -0.86564050 |
| B  | 7.79718631  | -3.66246319 | 3.62865844  |
| C  | -4.98356264 | 0.00836246  | -0.00248239 |
| C  | 5.73601164  | -2.56083027 | 2.53648029  |
| C  | 5.77726518  | -0.86016645 | 0.84232676  |
| H  | 7.72757640  | 1.51545290  | -1.52897402 |
| H  | 5.22941714  | 1.52528967  | -1.53249386 |
| C  | 5.77612508  | 0.85328853  | -0.86447976 |
| F  | 6.84439910  | -4.39684279 | 4.36257641  |
| F  | 9.20666666  | -3.67828270 | 3.64088242  |

|   |             |             |             |
|---|-------------|-------------|-------------|
| C | -0.01166294 | 0.00503311  | -4.98355409 |
| C | 5.07589281  | -0.00312662 | -0.00963575 |
| H | 8.95732133  | -0.01270863 | -0.00982188 |
| C | 7.16777284  | -0.86008744 | 0.83875315  |
| C | 7.85120270  | -1.72574250 | 1.69930405  |
| C | 7.86344925  | -0.00526563 | -0.01449110 |
| C | 0.04396636  | 5.19464087  | 0.04041330  |
| C | -0.85030166 | 5.77481866  | -0.85259583 |
| C | -0.84723648 | 7.16525704  | -0.85046567 |
| C | 0.00845759  | 7.85969098  | 0.00318860  |
| C | 0.86231933  | 7.16141583  | 0.85594479  |
| C | 0.86141534  | 5.77106764  | 0.85597177  |
| O | 1.71834058  | 5.07221542  | 1.71178622  |
| C | 2.56031505  | 5.72496288  | 2.55177400  |
| C | 2.57629640  | 7.12441826  | 2.56679053  |
| C | 1.72715998  | 7.84255923  | 1.71873767  |
| O | 3.30092537  | 5.09955437  | 3.29143861  |
| B | 3.66187609  | 7.78298868  | 3.64993108  |
| F | 4.39501394  | 6.82809579  | 4.38235721  |
| F | 3.67839951  | 9.19242854  | 3.66548201  |
| H | -1.52187739 | 5.23003409  | -1.52257081 |
| H | -1.51078171 | 7.72817984  | -1.51316532 |
| H | 0.01644550  | 8.95356000  | 0.01043066  |
| H | 1.73999253  | 8.93628735  | 1.73081555  |
| C | 1.71261932  | -1.72163191 | 7.84921168  |
| C | 0.00000000  | 0.00000000  | 7.86346437  |
| C | 2.55979964  | -2.57324399 | 7.13250833  |
| C | 0.85138892  | -0.85585778 | 7.16678932  |
| C | -0.85186005 | 0.85631198  | 7.16756877  |
| C | 2.54533688  | -2.55869369 | 5.73304110  |
| C | 0.85239936  | -0.85686860 | 5.77627780  |
| C | -0.85326071 | 0.85772779  | 5.77713568  |
| C | -0.00028150 | 0.00027256  | 5.07590291  |
| O | 1.70711511  | -1.71605838 | 5.07888476  |
| O | 3.28406975  | -3.30129242 | 5.10889086  |
| H | 1.72414872  | -1.73319106 | 8.94297600  |
| H | 0.00668056  | -0.00671498 | 8.95733072  |
| B | 3.64057594  | -3.65967980 | 7.79293680  |
| H | -1.51371401 | 1.52164117  | 7.72936440  |
| H | -1.52183211 | 1.52981054  | 5.23120984  |
| F | 4.37224537  | -4.39518736 | 6.83929068  |
| F | 3.65538739  | -3.67456539 | 9.20240250  |
| O | 5.08087469  | -1.71831757 | 1.69890139  |
| O | 5.11272795  | -3.30251694 | 3.27685922  |
| C | 7.13549312  | -2.57630803 | 2.54837377  |
| H | 0.87743529  | -5.53817138 | -0.41794072 |
| H | -0.88618997 | -5.54326193 | -0.41792265 |
| H | -0.00467563 | -5.43227820 | 1.01719368  |

|   |             |             |             |
|---|-------------|-------------|-------------|
| H | -5.33938817 | 0.00818571  | -1.02218243 |
| H | 0.86749114  | 0.44073250  | -5.43483467 |
| H | -5.43045891 | -0.87367249 | 0.43191152  |
| H | -0.01380144 | -1.01361636 | -5.34236976 |
| H | -5.43132480 | 0.88995991  | 0.43190797  |
| H | -0.89611036 | 0.44074462  | -5.42435816 |
| O | -1.22600885 | 10.84609192 | -0.50368107 |
| H | -2.17657874 | 10.84917299 | -0.27654329 |
| H | -1.12659059 | 11.62068222 | -1.09073389 |

# Figure9\_d

94

|    |             |             |             |
|----|-------------|-------------|-------------|
| Zn | 1.11832588  | -1.12823526 | 1.11702073  |
| O  | 0.00000000  | 0.00000000  | 0.00000000  |
| Zn | -1.11690035 | 1.12047199  | 1.12350596  |
| Zn | 1.12219395  | 1.11897262  | -1.11971895 |
| Zn | -1.12621595 | -1.11650539 | -1.12339591 |
| O  | 0.80213697  | -0.81178373 | 3.00875080  |
| C  | 0.00305483  | -0.00843257 | 3.58191925  |
| O  | -0.79708182 | 0.79703132  | 3.01323421  |
| C  | 3.58191236  | -0.01082909 | -0.00354043 |
| O  | 3.00968100  | -0.81326198 | 0.79713438  |
| O  | 3.01229190  | 0.79448044  | -0.80316691 |
| C  | 0.00918028  | 3.58138347  | 0.00676958  |
| O  | 0.80842204  | 3.01007489  | -0.79661456 |
| O  | -3.00902029 | 0.80786599  | 0.80608208  |
| C  | -0.00334651 | 0.00665239  | -3.58357973 |
| O  | -0.80714607 | -0.79471572 | -3.01421696 |
| O  | 0.80107402  | 0.80531462  | -3.01104096 |
| C  | -3.58357456 | 0.00904983  | 0.00325300  |
| O  | -3.01623017 | -0.79323645 | -0.80105763 |
| O  | -0.79311094 | 3.01114733  | 0.80787288  |
| C  | -0.01001744 | -3.58523958 | -0.00760262 |
| O  | -0.81097469 | -3.01160387 | -0.80746843 |
| O  | 0.79382786  | -3.01813380 | 0.79438345  |
| C  | -0.00571474 | -5.07589619 | -0.00231149 |
| H  | 8.94497845  | -1.73802636 | 1.70882553  |
| C  | 7.16655713  | 0.85094258  | -0.86564050 |
| B  | 7.79718631  | -3.66246319 | 3.62865844  |
| C  | -4.98356264 | 0.00836246  | -0.00248239 |
| C  | 5.73601164  | -2.56083027 | 2.53648029  |
| C  | 5.77726518  | -0.86016645 | 0.84232676  |
| H  | 7.72757640  | 1.51545290  | -1.52897402 |
| H  | 5.22941714  | 1.52528967  | -1.53249386 |
| C  | 5.77612508  | 0.85328853  | -0.86447976 |
| F  | 6.84439910  | -4.39684279 | 4.36257641  |

|   |             |             |             |
|---|-------------|-------------|-------------|
| F | 9.20666666  | -3.67828270 | 3.64088242  |
| C | -0.01166294 | 0.00503311  | -4.98355409 |
| C | 5.07589281  | -0.00312662 | -0.00963575 |
| H | 8.95732133  | -0.01270863 | -0.00982188 |
| C | 7.16777284  | -0.86008744 | 0.83875315  |
| C | 7.85120270  | -1.72574250 | 1.69930405  |
| C | 7.86344925  | -0.00526563 | -0.01449110 |
| C | 0.04396636  | 5.19464087  | 0.04041330  |
| C | -0.85030166 | 5.77481866  | -0.85259583 |
| C | -0.84723648 | 7.16525704  | -0.85046567 |
| C | 0.00845759  | 7.85969098  | 0.00318860  |
| C | 0.86231933  | 7.16141583  | 0.85594479  |
| C | 0.86141534  | 5.77106764  | 0.85597177  |
| O | 1.71834058  | 5.07221542  | 1.71178622  |
| C | 2.56031505  | 5.72496288  | 2.55177400  |
| C | 2.57629640  | 7.12441826  | 2.56679053  |
| C | 1.72715998  | 7.84255923  | 1.71873767  |
| O | 3.30092537  | 5.09955437  | 3.29143861  |
| B | 3.66187609  | 7.78298868  | 3.64993108  |
| F | 4.39501394  | 6.82809579  | 4.38235721  |
| F | 3.67839951  | 9.19242854  | 3.66548201  |
| H | -1.52187739 | 5.23003409  | -1.52257081 |
| H | -1.51078171 | 7.72817984  | -1.51316532 |
| H | 0.01644550  | 8.95356000  | 0.01043066  |
| H | 1.73999253  | 8.93628735  | 1.73081555  |
| C | 1.71261932  | -1.72163191 | 7.84921168  |
| C | 0.00000000  | 0.00000000  | 7.86346437  |
| C | 2.55979964  | -2.57324399 | 7.13250833  |
| C | 0.85138892  | -0.85585778 | 7.16678932  |
| C | -0.85186005 | 0.85631198  | 7.16756877  |
| C | 2.54533688  | -2.55869369 | 5.73304110  |
| C | 0.85239936  | -0.85686860 | 5.77627780  |
| C | -0.85326071 | 0.85772779  | 5.77713568  |
| C | -0.00028150 | 0.00027256  | 5.07590291  |
| O | 1.70711511  | -1.71605838 | 5.07888476  |
| O | 3.28406975  | -3.30129242 | 5.10889086  |
| H | 1.72414872  | -1.73319106 | 8.94297600  |
| H | 0.00668056  | -0.00671498 | 8.95733072  |
| B | 3.64057594  | -3.65967980 | 7.79293680  |
| H | -1.51371401 | 1.52164117  | 7.72936440  |
| H | -1.52183211 | 1.52981054  | 5.23120984  |
| F | 4.37224537  | -4.39518736 | 6.83929068  |
| F | 3.65538739  | -3.67456539 | 9.20240250  |
| O | 5.08087469  | -1.71831757 | 1.69890139  |
| O | 5.11272795  | -3.30251694 | 3.27685922  |
| C | 7.13549312  | -2.57630803 | 2.54837377  |
| H | 0.87743529  | -5.53817138 | -0.41794072 |
| H | -0.88618997 | -5.54326193 | -0.41792265 |

|   |             |             |             |
|---|-------------|-------------|-------------|
| H | -0.00467563 | -5.43227820 | 1.01719368  |
| H | -5.33938817 | 0.00818571  | -1.02218243 |
| H | 0.86749114  | 0.44073250  | -5.43483467 |
| H | -5.43045891 | -0.87367249 | 0.43191152  |
| H | -0.01380144 | -1.01361636 | -5.34236976 |
| H | -5.43132480 | 0.88995991  | 0.43190797  |
| H | -0.89611036 | 0.44074462  | -5.42435816 |
| H | -2.72672531 | 6.01382727  | -4.00272313 |
| H | -2.00313474 | 5.83105120  | -4.11483109 |
| C | 1.55557907  | 5.57918534  | -3.04281723 |
| O | 0.77370776  | 5.07748562  | -3.75783044 |
| O | 2.33734353  | 6.09060182  | -2.33586498 |

**Figure9\_e**

95

|    |             |             |             |
|----|-------------|-------------|-------------|
| Zn | -0.15577398 | -1.67446409 | -0.13151325 |
| O  | -1.00849389 | -1.15558820 | -1.79732819 |
| Zn | -2.62703734 | -0.15669243 | -1.41299255 |
| Zn | 0.20610823  | -0.04927571 | -2.82980281 |
| Zn | -1.45781369 | -2.74814787 | -2.81655850 |
| O  | -1.15364313 | -1.05038092 | 1.41559277  |
| C  | -2.23282131 | -0.38424002 | 1.47929665  |
| O  | -2.92167486 | 0.03544666  | 0.49861461  |
| C  | 2.29553838  | -0.21255044 | -0.78526275 |
| O  | 1.63958161  | -0.94447777 | 0.01874628  |
| O  | 1.89835898  | 0.21819486  | -1.91180632 |
| C  | -1.65407446 | 2.21146601  | -2.83299672 |
| O  | -0.53800584 | 1.71323736  | -3.17470713 |
| O  | -4.20491710 | -1.02316513 | -2.14655839 |
| C  | 0.21645825  | -1.92904662 | -5.07503370 |
| O  | -0.57374469 | -2.77191869 | -4.54815181 |
| O  | 0.61602851  | -0.84038237 | -4.55743527 |
| C  | -4.31363558 | -2.10080195 | -2.80960709 |
| O  | -3.36891810 | -2.87789573 | -3.15033083 |
| O  | -2.56443952 | 1.63640655  | -2.16132044 |
| C  | -0.36269733 | -4.52666754 | -0.76153291 |
| O  | -0.93082033 | -4.37514242 | -1.88610045 |
| O  | -0.00022540 | -3.60573670 | 0.03311064  |
| C  | -0.08928661 | -5.92418936 | -0.32075746 |
| H  | 6.96470163  | -0.03399441 | 2.79871797  |
| C  | 5.73780292  | 1.36405098  | -0.81149069 |
| B  | 5.59862674  | -1.72961704 | 4.79003554  |
| C  | -5.60167708 | -2.47555492 | -3.21024317 |
| C  | 3.87336077  | -1.48143377 | 2.88825962  |
| C  | 4.18303269  | -0.24160728 | 0.85576139  |
| H  | 6.36141461  | 1.99332263  | -1.45293716 |



|   |             |             |             |
|---|-------------|-------------|-------------|
| H | 4.05869801  | 1.33645630  | -2.16492854 |
| C | 4.45565009  | 0.99619027  | -1.20400917 |
| F | 4.60249068  | -2.51350037 | 5.40565905  |
| F | 6.89619378  | -1.36642678 | 5.20409733  |
| C | 0.68931104  | -2.23703653 | -6.35626453 |
| C | 3.67297850  | 0.19125213  | -0.37092442 |
| H | 7.25164701  | 1.21596057  | 0.72847705  |
| C | 5.46564158  | 0.12802637  | 1.24538906  |
| C | 5.95778291  | -0.31583543 | 2.47736574  |
| C | 6.24385599  | 0.93060257  | 0.41294355  |
| C | -1.92712928 | 3.74298970  | -3.26290101 |
| C | -2.55048143 | 3.85556393  | -4.50086143 |
| C | -2.80141098 | 5.16254985  | -4.90354613 |
| C | -2.43205247 | 6.22808755  | -4.08416822 |
| C | -1.81063772 | 5.98510311  | -2.85996912 |
| C | -1.55847293 | 4.67924627  | -2.45472876 |
| O | -0.93517910 | 4.43720047  | -1.22670095 |
| C | -0.56618989 | 5.45696794  | -0.41153164 |
| C | -0.81127793 | 6.77866195  | -0.80142018 |
| C | -1.43356656 | 7.04258229  | -2.02577948 |
| O | -0.02360688 | 5.22766927  | 0.65606800  |
| B | -0.30226506 | 7.92162134  | 0.30308942  |
| F | 0.29587234  | 7.37935340  | 1.45805120  |
| F | -0.54885380 | 9.25295188  | -0.08906939 |
| H | -2.84040729 | 3.01951140  | -5.14400204 |
| H | -3.28800592 | 5.37042218  | -5.86081288 |
| H | -2.62623117 | 7.25899877  | -4.39430109 |
| H | -1.62491392 | 8.07570243  | -2.33008313 |
| C | -1.80942027 | -0.61032348 | 6.36161836  |
| C | -3.70583504 | 0.55336703  | 5.38862302  |
| C | -0.62790022 | -1.34016851 | 6.19441208  |
| C | -2.52653417 | -0.17499136 | 5.24214682  |
| C | -4.40797037 | 0.97938111  | 4.26224635  |
| C | -0.16382786 | -1.63450093 | 4.90719233  |
| C | -2.04844305 | -0.47786930 | 3.97202156  |
| C | -3.93256965 | 0.67815681  | 2.99080378  |
| C | -2.74994918 | -0.05226866 | 2.84107778  |
| O | -0.86522378 | -1.20862665 | 3.82680102  |
| O | 0.86616904  | -2.27074431 | 4.76212890  |
| H | -2.17187730 | -0.38040139 | 7.36777324  |
| H | -4.07367694 | 0.78656887  | 6.39208828  |
| B | 0.33923133  | -1.92902332 | 7.42017408  |
| H | -5.33167085 | 1.54998751  | 4.39458566  |
| H | -4.48371662 | 1.01257666  | 2.10699477  |
| F | 1.47445297  | -2.63209773 | 6.96994009  |
| F | -0.12788837 | -1.63273992 | 8.71672715  |
| O | 3.40362369  | -1.04677630 | 1.69201949  |
| O | 3.17998623  | -2.18301755 | 3.60502637  |

|   |             |             |             |
|---|-------------|-------------|-------------|
| C | 5.16176471  | -1.12065743 | 3.29909434  |
| C | 2.20079033  | -4.40789587 | 1.94092671  |
| O | 2.95941828  | -4.05693760 | 1.11245712  |
| O | 1.45671199  | -4.81084615 | 2.74608517  |
| H | -5.57977003 | -2.79209840 | -4.24258048 |
| H | 1.57499298  | -1.69181783 | -6.64730419 |
| H | -6.00200564 | -3.32845605 | -2.68232584 |
| H | 0.99578964  | -3.27216109 | -6.38769745 |
| H | -6.32373746 | -1.67252881 | -3.19690683 |
| H | -0.05381829 | -2.15923238 | -7.13607560 |
| H | 0.95125649  | -6.21341137 | -0.31620949 |
| H | -0.67306066 | -6.68789687 | -0.81305685 |
| H | -0.37318949 | -6.03700952 | 0.71513383  |
| O | 2.44294726  | -3.03512121 | -1.99294949 |
| H | 2.54936475  | -3.22178678 | -1.03845862 |
| H | 3.13483287  | -3.57865771 | -2.41333965 |

**Figure9\_f**

97

|    |             |             |             |
|----|-------------|-------------|-------------|
| Zn | 0.93922116  | -1.09691100 | 1.31325872  |
| O  | -0.16775222 | 0.03614049  | 0.18982331  |
| Zn | -1.10499581 | 1.32668215  | 1.29493244  |
| Zn | 0.95149763  | 0.97076554  | -1.09038968 |
| Zn | -1.45992531 | -1.06120932 | -0.76048040 |
| O  | 0.79248013  | -0.61619027 | 3.19105911  |
| C  | 0.10467870  | 0.29180728  | 3.75221602  |
| O  | -0.67009450 | 1.11773771  | 3.17779561  |
| C  | 3.39167605  | -0.27707223 | -0.06036481 |
| O  | 2.81999626  | -0.96709180 | 0.83934772  |
| O  | 2.82862017  | 0.51221636  | -0.88035567 |
| C  | 0.12408151  | 3.59468267  | -0.08954783 |
| O  | 0.81296846  | 2.90026491  | -0.89814272 |
| O  | -3.03439463 | 1.15225376  | 1.13495365  |
| C  | -0.44073855 | -0.22139317 | -3.37405856 |
| O  | -1.25996125 | -0.90788639 | -2.68844951 |
| O  | 0.46498186  | 0.54661786  | -2.92396527 |
| C  | -3.72899466 | 0.34770419  | 0.43998230  |
| O  | -3.28889186 | -0.55674006 | -0.33509747 |
| O  | -0.65795757 | 3.15483757  | 0.80798108  |
| C  | -0.46078477 | -3.52622435 | 0.46873127  |
| O  | -1.27207063 | -2.94765057 | -0.31704439 |
| O  | 0.44341735  | -2.97133166 | 1.16548841  |
| C  | -0.57356622 | -5.00746091 | 0.59251430  |
| H  | 8.71576281  | -2.31949271 | 1.40950058  |
| C  | 6.95784658  | 0.21323531  | -1.23406466 |
| B  | 7.56792486  | -3.99330803 | 3.55133453  |

|   |             |             |             |
|---|-------------|-------------|-------------|
| C | -5.12111926 | 0.46470896  | 0.53108087  |
| C | 5.52350305  | -2.80531404 | 2.51987976  |
| C | 5.57078494  | -1.24385530 | 0.69677074  |
| H | 7.51786829  | 0.77728146  | -1.98543379 |
| H | 5.03511870  | 0.99755555  | -1.81708099 |
| C | 5.57597995  | 0.33295693  | -1.13701059 |
| F | 6.61828818  | -4.58852312 | 4.40553685  |
| F | 8.96867367  | -4.12703771 | 3.46734810  |
| C | -0.55468402 | -0.32560244 | -4.76551710 |
| C | 4.87689320  | -0.39590881 | -0.17028267 |
| H | 8.73440238  | -0.73290369 | -0.43793289 |
| C | 6.95273588  | -1.36135166 | 0.59711874  |
| C | 7.62876080  | -2.21571165 | 1.47463925  |
| C | 7.64728901  | -0.63356682 | -0.36757651 |
| C | 0.28831451  | 5.19732270  | -0.18708691 |
| C | -0.62223263 | 5.78339669  | -1.05955930 |
| C | -0.50946449 | 7.16497249  | -1.16848332 |
| C | 0.46020561  | 7.84582930  | -0.43407854 |
| C | 1.31824702  | 7.14284081  | 0.41057125  |
| C | 1.20779692  | 5.76133145  | 0.52148383  |
| O | 2.06906867  | 5.05773673  | 1.36900910  |
| C | 3.02078589  | 5.69731876  | 2.09409454  |
| C | 3.14807524  | 7.08771594  | 1.99637366  |
| C | 2.29665090  | 7.81039349  | 1.15449093  |
| O | 3.76346641  | 5.06794746  | 2.82830201  |
| B | 4.36073605  | 7.73047416  | 2.94595639  |
| F | 5.06948094  | 6.77379087  | 3.69974503  |
| F | 4.48939125  | 9.13078660  | 2.84793362  |
| H | -1.38324230 | 5.24926641  | -1.63596178 |
| H | -1.17466039 | 7.73142928  | -1.82650027 |
| H | 0.55488412  | 8.93266633  | -0.51462012 |
| H | 2.39649866  | 8.89703860  | 1.07843462  |
| C | 1.99078634  | -1.23994933 | 8.01411314  |
| C | 0.42511360  | 0.61637262  | 8.00940851  |
| C | 2.71177451  | -2.21055276 | 7.31074525  |
| C | 1.15146074  | -0.35732694 | 7.32600474  |
| C | -0.40665893 | 1.48780777  | 7.30800872  |
| C | 2.59303170  | -2.29813836 | 5.91892689  |
| C | 1.04754791  | -0.46102021 | 5.94326319  |
| C | -0.51277137 | 1.38673505  | 5.92531837  |
| C | 0.21468709  | 0.41097763  | 5.23739973  |
| O | 1.77688537  | -1.43836443 | 5.25918112  |
| O | 3.22178705  | -3.14443673 | 5.30640064  |
| H | 2.08380052  | -1.17170126 | 9.10189873  |
| H | 0.51369724  | 0.68985095  | 9.09724452  |
| B | 3.75029112  | -3.33259147 | 7.97939933  |
| H | -0.96978366 | 2.24623649  | 7.85937461  |
| H | -1.16555796 | 2.07070455  | 5.37506992  |

|   |             |             |             |
|---|-------------|-------------|-------------|
| F | 4.34774159  | -4.19556040 | 7.03913873  |
| F | 3.87010796  | -3.24463068 | 9.38116299  |
| O | 4.87551075  | -1.97464248 | 1.66509250  |
| O | 4.90131596  | -3.43511222 | 3.35831885  |
| C | 6.91431463  | -2.93788495 | 2.43622842  |
| H | 0.23655469  | -5.57199950 | 0.15502112  |
| H | -1.51695141 | -5.42826711 | 0.27732144  |
| H | -0.52374912 | -5.28645741 | 1.63466555  |
| H | -5.55171671 | 0.41931080  | -0.45832543 |
| H | 0.31953341  | -0.00011811 | -5.30976321 |
| H | -5.60209956 | -0.34201235 | 1.06424003  |
| H | -0.66412793 | -1.36412940 | -5.04098720 |
| H | -5.46399380 | 1.41058019  | 0.92371895  |
| H | -1.43275847 | 0.14945449  | -5.17747119 |
| H | -2.90456072 | 6.08637323  | -4.67530778 |
| H | -2.18730610 | 5.86028500  | -4.60810615 |
| C | 1.38969471  | 5.21421363  | -3.57309585 |
| O | 0.41369671  | 4.88533991  | -4.13726248 |
| O | 2.34719628  | 5.58466906  | -3.01050022 |
| O | 2.47979783  | 2.45778151  | -4.03307573 |
| H | 2.58432722  | 2.41627232  | -5.00224983 |
| H | 1.76366994  | 1.81015179  | -3.84689259 |

**Figure10\_a**

77

|    |             |             |             |
|----|-------------|-------------|-------------|
| Zn | 1.12016501  | -1.12325149 | -1.12019609 |
| Zn | 1.12037274  | 1.11972698  | 1.12078807  |
| Zn | -1.12081915 | 1.11972699  | -1.12034163 |
| Zn | -1.12229905 | -1.12151003 | 1.12233020  |
| O  | 0.00000000  | 0.00000000  | 0.00000000  |
| O  | 3.01100604  | -0.80403632 | -0.80147751 |
| O  | 3.01099823  | 0.80067974  | 0.80186059  |
| O  | 0.80139398  | -0.80403632 | -3.01102828 |
| O  | -0.80194414 | 0.80067974  | -3.01097599 |
| O  | -0.80157825 | 3.01062611  | -0.80143281 |
| O  | 0.80182977  | 0.80167246  | 3.01181160  |
| O  | -3.01343636 | -0.80247816 | 0.80236640  |
| O  | -3.01183385 | 0.80167246  | -0.80174622 |
| O  | -0.80228277 | -0.80247816 | 3.01345863  |
| O  | 0.80145506  | 3.01062611  | 0.80155601  |
| O  | -0.80250062 | -3.01519368 | 0.80252290  |
| O  | 0.80081161  | -3.01458210 | -0.80083384 |
| O  | 1.70360822  | 1.70795132  | 5.08278285  |
| O  | 3.28393460  | 3.28974847  | 5.11642038  |

|   |             |             |             |
|---|-------------|-------------|-------------|
| O | 1.70373736  | 5.07982997  | -1.70378462 |
| O | 3.28476597  | 5.11421132  | -3.28485710 |
| O | 5.08366535  | -1.70207366 | -1.70688627 |
| O | 5.11809784  | -3.28320068 | -3.28786852 |
| O | 6.25482341  | 4.42804722  | 0.40041421  |
| O | 5.32295707  | 4.88179086  | 2.50724949  |
| C | 2.55525160  | 2.56147944  | 7.13836914  |
| C | 0.84306920  | 0.84777862  | 7.16872225  |
| C | -0.86386200 | -0.86072238 | 7.16559590  |
| C | 2.54272198  | 2.54819268  | 5.73887214  |
| C | 0.84605435  | 0.85000761  | 5.77821867  |
| C | -0.86330397 | -0.86091828 | 5.77515774  |
| C | -0.00746748 | -0.00469948 | 5.07589556  |
| C | -0.00000543 | -0.00012993 | 3.58358746  |
| C | -0.00028013 | -0.00165413 | -3.58193008 |
| C | 0.03062197  | 5.19480361  | -0.03062282 |
| C | -0.86429207 | 5.77099820  | 0.86431603  |
| C | -0.86479058 | 7.16144140  | 0.86481455  |
| C | -0.01167845 | 7.85967882  | 0.01167877  |
| C | 0.84316968  | 7.16520783  | -0.84319308 |
| C | 0.84582712  | 5.77486441  | -0.84585059 |
| C | -3.58358746 | -0.00012992 | 0.00010487  |
| C | 2.54324950  | 5.73632012  | -2.54332007 |
| C | 2.55563196  | 7.13583776  | -2.55570286 |
| C | 1.70545382  | 7.85019549  | -1.70550114 |
| C | -0.00082649 | -3.58526143 | 0.00082652  |
| C | 7.85400170  | -1.70239656 | -1.70988556 |
| C | 7.86344708  | 0.01486356  | 0.00715053  |
| C | 7.13967791  | -2.55318744 | -2.55989597 |
| C | 7.16916337  | -0.84012436 | -0.84706112 |
| C | 7.16516191  | 0.86767222  | 0.86056816  |
| C | 5.74017313  | -2.54131957 | -2.54666858 |
| C | 5.77865774  | -0.84376092 | -0.84933860 |
| C | 5.77472794  | 0.86645623  | 0.86070808  |
| C | 5.07589098  | 0.00986633  | 0.00489790  |
| C | -0.00000000 | 3.58140162  | -0.00000000 |
| C | 3.58193010  | -0.00165412 | 0.00018075  |
| C | 5.78834970  | 4.65495211  | 1.45435794  |
| C | 1.70521779  | 1.71108139  | 7.85315513  |
| C | -0.01114850 | -0.00684860 | 7.86343812  |
| F | 9.21264276  | -3.64778237 | -3.65641860 |
| F | 4.37340043  | 6.84761056  | -4.37352178 |
| F | 3.65140408  | 9.20873936  | -3.65150538 |
| F | 3.65025117  | 3.65863745  | 9.21078313  |
| F | 4.37201919  | 4.37976460  | 6.84931897  |
| F | 6.85154831  | -4.37102993 | -4.37726874 |
| H | 1.71519826  | 1.72166619  | 8.94691269  |
| H | -1.53255007 | -1.53107667 | 5.22770105  |

|      |             |             |             |
|------|-------------|-------------|-------------|
| H    | -1.53384198 | 5.22322853  | 1.53388453  |
| H    | 8.94779591  | -1.71185866 | -1.72044994 |
| H    | -1.52796471 | -1.52510128 | 7.72586987  |
| H    | 7.72509852  | 1.53236341  | 1.52463485  |
| H    | 5.22692664  | 1.53578990  | 1.53050218  |
| H    | 1.71547337  | 8.94397379  | -1.71552096 |
| H    | -1.52915428 | 7.72140783  | 1.52919671  |
| B    | 3.63740627  | 3.64500347  | 7.80127747  |
| B    | 7.80313857  | -3.63559902 | -3.64285075 |
| B    | 3.63850564  | 7.79923490  | -3.63860660 |
| VEC1 | 12.94100000 | 0.00000000  | 0.00000000  |
| VEC2 | 0.00000000  | 12.94100000 | 0.00000000  |
| VEC3 | 0.00000000  | 0.00000000  | 12.94100000 |

**Figure10\_b**

79

|    |             |             |             |
|----|-------------|-------------|-------------|
| Zn | 0.61428565  | -1.27937534 | -0.52648892 |
| Zn | 0.60386565  | 0.95031652  | 1.72769122  |
| Zn | -1.63986465 | 0.95031653  | -0.51089712 |
| Zn | -1.62556796 | -1.30407120 | 1.71850956  |
| O  | -0.51118378 | -0.16936892 | 0.60156567  |
| O  | 2.50357990  | -0.95090439 | -0.20800227 |
| O  | 2.49596864  | 0.64430469  | 1.40477695  |
| O  | 0.29146519  | -0.95090439 | -2.41504748 |
| O  | -1.32129232 | 0.64430469  | -2.40373602 |
| O  | -1.33139586 | 2.84115184  | -0.18119140 |
| O  | 0.28937697  | 0.61924839  | 3.61715915  |
| O  | -3.51891781 | -0.99431168 | 1.40254457  |
| O  | -3.52860607 | 0.61924838  | -0.19207424 |
| O  | -1.30525984 | -0.99431168 | 3.61112949  |
| O  | 0.27345306  | 2.84115185  | 1.41997970  |
| O  | -1.29499356 | -3.19391881 | 1.38717584  |
| O  | 0.30644134  | -3.17440520 | -0.21793751 |
| O  | 1.18818610  | 1.51860358  | 5.69243504  |
| O  | 2.75920938  | 3.10946277  | 5.73364326  |
| O  | 1.16065323  | 4.93037054  | -1.07411148 |
| O  | 2.73963171  | 4.98339005  | -2.65671681 |
| O  | 4.58044761  | -1.83135607 | -1.12100721 |
| O  | 4.62236976  | -3.40290579 | -2.71133020 |
| O  | 5.01576264  | 4.26636083  | 1.73128093  |
| O  | 6.30234598  | 5.98272640  | 2.68552599  |
| C  | 2.03715396  | 2.36500504  | -5.18892911 |
| C  | 0.33512730  | 0.64109234  | -5.16677910 |
| C  | -1.36171740 | -1.07739242 | -5.17808313 |
| C  | 2.02309249  | 2.35989449  | 6.35253470  |
| C  | 0.33649929  | 0.65153543  | 6.38375223  |

|   |             |             |             |
|---|-------------|-------------|-------------|
| C | -1.36275812 | -1.06938883 | 6.37250201  |
| C | -0.51278291 | -0.20403309 | 5.67735029  |
| C | -0.50706502 | -0.19062302 | 4.18508773  |
| C | -0.51557569 | -0.14991028 | -2.98030926 |
| C | -0.51118378 | 5.02561520  | 0.60156567  |
| C | -1.40844450 | 5.59123928  | 1.50088735  |
| C | -1.41712914 | -5.95937170 | 1.50959193  |
| C | -0.56912514 | -5.25110089 | 0.65964010  |
| C | 0.28881289  | -5.93546962 | -0.20026858 |
| C | 0.29965336  | 5.61526660  | -0.21113393 |
| C | -4.09470587 | -0.19062302 | 0.60566868  |
| C | 1.99531896  | 5.59673522  | -1.91069440 |
| C | 1.99944679  | -5.94464979 | -1.91483172 |
| C | 1.14605621  | -5.24033995 | -1.05948094 |
| C | -0.49089985 | -3.75451553 | 0.58123515  |
| C | -5.59026744 | -1.81533147 | -1.12709977 |
| C | -5.58895750 | -0.10819673 | 0.60002900  |
| C | -6.30054711 | -2.66529283 | -1.98131857 |
| C | -6.27917756 | -0.96221210 | -0.25843809 |
| C | -6.29126932 | 0.73543560  | 1.45924318  |
| C | 5.24091864  | -2.66175276 | -1.96645967 |
| C | 5.27136061  | -0.97403149 | -0.25918534 |
| C | 5.25932905  | 0.72602289  | 1.46092750  |
| C | 4.56456339  | -0.12961183 | 0.60085754  |
| C | -0.53227051 | 3.41190826  | 0.62270083  |
| C | 3.07069181  | -0.14991027 | 0.59773959  |
| C | 5.65315475  | 5.12603715  | 2.21269997  |
| C | 1.19296492  | 1.50541255  | -4.47822596 |
| C | -0.51324374 | -0.22263553 | -4.47616601 |
| F | -4.22243647 | -3.74116692 | -3.08659423 |
| F | 3.81678793  | -6.21143662 | -3.73634723 |
| F | 3.08173339  | -3.85890175 | -2.99960430 |
| F | 3.12805853  | 3.45636319  | -3.11129967 |
| F | 3.84285050  | 4.19563986  | -5.46927102 |
| F | 6.36094050  | -4.47405770 | -3.80906479 |
| H | 1.20414141  | 1.50960845  | -3.38443681 |
| H | -2.02867632 | -1.74024173 | 5.82184715  |
| H | -2.07398676 | 5.03559507  | 2.16795832  |
| H | -4.49644935 | -1.81828356 | -1.13894036 |
| H | -2.02125172 | -1.74896545 | -4.62099892 |
| H | -5.73449229 | 1.39948979  | 2.12659565  |
| H | 4.70836737  | 1.38815603  | 2.13527080  |
| H | 1.14962405  | -4.14648154 | -1.06305697 |
| H | -2.08401342 | -5.40725717 | 2.17800802  |
| H | 2.19153421  | 4.95815181  | 3.49914670  |
| H | 1.96343377  | 5.40877679  | 2.93653835  |
| B | 3.07714898  | -5.26850929 | -2.99500936 |
| B | 3.11367231  | 3.45096257  | -4.52084603 |



|      |             |             |             |
|------|-------------|-------------|-------------|
| B    | -5.63197141 | -3.73737233 | -3.07138188 |
| VEC1 | 12.94100000 | 0.00000000  | 0.00000000  |
| VEC2 | 0.00000000  | 12.94100000 | 0.00000000  |
| VEC3 | 0.00000000  | 0.00000000  | 12.94100000 |

**Figure14\_a**

94

|    |             |             |             |
|----|-------------|-------------|-------------|
| Zn | 1.11832588  | -1.12823526 | 1.11702073  |
| O  | 0.00000000  | 0.00000000  | 0.00000000  |
| Zn | -1.11690035 | 1.12047199  | 1.12350596  |
| Zn | 1.12219394  | 1.11897262  | -1.11971895 |
| Zn | -1.12621595 | -1.11650539 | -1.12339591 |
| O  | 0.80213697  | -0.81178373 | 3.00875080  |
| C  | 0.00305483  | -0.00843257 | 3.58191925  |
| O  | -0.79708182 | 0.79703132  | 3.01323421  |
| C  | 3.58191236  | -0.01082909 | -0.00354043 |
| O  | 3.00968100  | -0.81326198 | 0.79713438  |
| O  | 3.01229190  | 0.79448044  | -0.80316691 |
| C  | 0.00918028  | 3.58138347  | 0.00676958  |
| O  | 0.80842204  | 3.01007489  | -0.79661456 |
| O  | -3.00902029 | 0.80786599  | 0.80608208  |
| C  | -0.00334651 | 0.00665239  | -3.58357973 |
| O  | -0.80714607 | -0.79471572 | -3.01421696 |
| O  | 0.80107402  | 0.80531462  | -3.01104096 |
| C  | -3.58357456 | 0.00904983  | 0.00325300  |
| O  | -3.01623016 | -0.79323645 | -0.80105763 |
| O  | -0.79311094 | 3.01114733  | 0.80787288  |
| C  | -0.01001744 | -3.58523958 | -0.00760262 |
| O  | -0.81097469 | -3.01160387 | -0.80746843 |
| O  | 0.79382786  | -3.01813380 | 0.79438345  |
| C  | -0.00571474 | -5.07589619 | -0.00231149 |
| H  | 8.94497845  | -1.73802636 | 1.70882553  |
| C  | 7.16655713  | 0.85094258  | -0.86564050 |
| B  | 7.79718631  | -3.66246319 | 3.62865844  |
| C  | -4.98356264 | 0.00836246  | -0.00248239 |
| C  | 5.73601164  | -2.56083027 | 2.53648029  |
| C  | 5.77726518  | -0.86016645 | 0.84232676  |
| H  | 7.72757640  | 1.51545290  | -1.52897402 |
| H  | 5.22941714  | 1.52528967  | -1.53249386 |
| C  | 5.77612508  | 0.85328853  | -0.86447976 |
| F  | 6.84439910  | -4.39684279 | 4.36257641  |
| F  | 9.20666666  | -3.67828270 | 3.64088242  |
| C  | -0.01166294 | 0.00503311  | -4.98355409 |
| C  | 5.07589281  | -0.00312662 | -0.00963575 |

|   |             |             |             |
|---|-------------|-------------|-------------|
| H | 8.95732133  | -0.01270863 | -0.00982188 |
| C | 7.16777284  | -0.86008744 | 0.83875315  |
| C | 7.85120270  | -1.72574250 | 1.69930404  |
| C | 7.86344925  | -0.00526563 | -0.01449110 |
| C | 0.04396636  | 5.19464087  | 0.04041330  |
| C | -0.85030166 | 5.77481866  | -0.85259583 |
| C | -0.84723648 | 7.16525704  | -0.85046567 |
| C | 0.00845759  | 7.85969098  | 0.00318860  |
| C | 0.86231933  | 7.16141583  | 0.85594479  |
| C | 0.86141534  | 5.77106764  | 0.85597177  |
| O | 1.71834058  | 5.07221542  | 1.71178622  |
| C | 2.56031505  | 5.72496288  | 2.55177400  |
| C | 2.57629640  | 7.12441826  | 2.56679053  |
| C | 1.72715998  | 7.84255923  | 1.71873767  |
| O | 3.30092537  | 5.09955437  | 3.29143861  |
| B | 3.66187609  | 7.78298868  | 3.64993108  |
| F | 4.39501394  | 6.82809579  | 4.38235721  |
| F | 3.67839951  | 9.19242854  | 3.66548201  |
| H | -1.52187739 | 5.23003409  | -1.52257081 |
| H | -1.51078171 | 7.72817984  | -1.51316532 |
| H | 0.01644550  | 8.95356000  | 0.01043066  |
| H | 1.73999253  | 8.93628735  | 1.73081555  |
| C | 1.71261932  | -1.72163191 | 7.84921168  |
| C | 0.00000000  | 0.00000000  | 7.86346437  |
| C | 2.55979964  | -2.57324399 | 7.13250833  |
| C | 0.85138892  | -0.85585778 | 7.16678932  |
| C | -0.85186005 | 0.85631198  | 7.16756877  |
| C | 2.54533688  | -2.55869369 | 5.73304110  |
| C | 0.85239936  | -0.85686860 | 5.77627780  |
| C | -0.85326071 | 0.85772779  | 5.77713568  |
| C | -0.00028150 | 0.00027256  | 5.07590291  |
| O | 1.70711511  | -1.71605838 | 5.07888476  |
| O | 3.28406975  | -3.30129242 | 5.10889086  |
| H | 1.72414872  | -1.73319106 | 8.94297600  |
| H | 0.00668056  | -0.00671498 | 8.95733072  |
| B | 3.64057594  | -3.65967980 | 7.79293679  |
| H | -1.51371400 | 1.52164117  | 7.72936440  |
| H | -1.52183211 | 1.52981054  | 5.23120984  |
| F | 4.37224537  | -4.39518736 | 6.83929068  |
| F | 3.65538739  | -3.67456539 | 9.20240250  |
| O | 5.08087469  | -1.71831757 | 1.69890138  |
| O | 5.11272795  | -3.30251694 | 3.27685922  |
| C | 7.13549312  | -2.57630803 | 2.54837377  |
| H | 0.87743529  | -5.53817138 | -0.41794072 |
| H | -0.88618997 | -5.54326193 | -0.41792265 |
| H | -0.00467563 | -5.43227820 | 1.01719368  |
| H | -5.33938817 | 0.00818571  | -1.02218243 |
| H | 0.86749114  | 0.44073250  | -5.43483467 |

|   |             |             |             |
|---|-------------|-------------|-------------|
| H | -5.43045891 | -0.87367249 | 0.43191152  |
| H | -0.01380144 | -1.01361636 | -5.34236976 |
| H | -5.43132480 | 0.88995991  | 0.43190797  |
| H | -0.89611036 | 0.44074462  | -5.42435816 |
| H | -4.25842155 | 2.97668432  | -7.39379008 |
| H | -4.50456049 | 2.84660068  | -8.09570539 |
| C | 0.20254113  | 3.78729062  | -3.89705119 |
| O | -0.91897523 | 3.47770644  | -3.74599911 |
| O | 1.31872693  | 4.09083824  | -4.07738232 |

**Figure14\_b**

100

|    |             |             |             |
|----|-------------|-------------|-------------|
| Zn | 1.11832588  | -1.12823526 | 1.11702073  |
| O  | 0.00000000  | 0.00000000  | 0.00000000  |
| Zn | -1.11690035 | 1.12047199  | 1.12350596  |
| Zn | 1.12219394  | 1.11897262  | -1.11971895 |
| Zn | -1.12621595 | -1.11650539 | -1.12339591 |
| O  | 0.80213697  | -0.81178373 | 3.00875080  |
| C  | 0.00305483  | -0.00843257 | 3.58191925  |
| O  | -0.79708182 | 0.79703132  | 3.01323421  |
| C  | 3.58191236  | -0.01082909 | -0.00354043 |
| O  | 3.00968100  | -0.81326198 | 0.79713438  |
| O  | 3.01229190  | 0.79448044  | -0.80316691 |
| C  | 0.00918028  | 3.58138347  | 0.00676958  |
| O  | 0.80842204  | 3.01007489  | -0.79661456 |
| O  | -3.00902029 | 0.80786599  | 0.80608208  |
| C  | -0.00334651 | 0.00665239  | -3.58357973 |
| O  | -0.80714607 | -0.79471572 | -3.01421696 |
| O  | 0.80107402  | 0.80531462  | -3.01104096 |
| C  | -3.58357456 | 0.00904983  | 0.00325300  |
| O  | -3.01623016 | -0.79323645 | -0.80105763 |
| O  | -0.79311094 | 3.01114733  | 0.80787288  |
| C  | -0.01001744 | -3.58523958 | -0.00760262 |
| O  | -0.81097469 | -3.01160387 | -0.80746843 |
| O  | 0.79382786  | -3.01813380 | 0.79438345  |
| C  | -0.00571474 | -5.07589619 | -0.00231149 |
| H  | 8.94497845  | -1.73802636 | 1.70882553  |
| C  | 7.16655713  | 0.85094258  | -0.86564050 |
| B  | 7.79718631  | -3.66246319 | 3.62865844  |
| C  | -4.98356264 | 0.00836246  | -0.00248239 |
| C  | 5.73601164  | -2.56083027 | 2.53648029  |
| C  | 5.77726518  | -0.86016645 | 0.84232676  |
| H  | 7.72757640  | 1.51545290  | -1.52897402 |
| B  | 4.94202950  | 1.87854011  | -1.88364843 |

|   |             |             |             |
|---|-------------|-------------|-------------|
| C | 5.77612508  | 0.85328853  | -0.86447976 |
| F | 6.84439910  | -4.39684279 | 4.36257641  |
| F | 9.20666666  | -3.67828270 | 3.64088242  |
| C | -0.01166294 | 0.00503311  | -4.98355409 |
| C | 5.07589281  | -0.00312662 | -0.00963575 |
| H | 8.95732133  | -0.01270863 | -0.00982188 |
| C | 7.16777284  | -0.86008744 | 0.83875315  |
| C | 7.85120270  | -1.72574250 | 1.69930404  |
| C | 7.86344925  | -0.00526563 | -0.01449110 |
| C | 0.04396636  | 5.19464087  | 0.04041330  |
| C | -0.85030166 | 5.77481866  | -0.85259583 |
| C | -0.84723648 | 7.16525704  | -0.85046567 |
| C | 0.00845759  | 7.85969098  | 0.00318860  |
| C | 0.86231933  | 7.16141583  | 0.85594479  |
| C | 0.86141534  | 5.77106764  | 0.85597177  |
| O | 1.71834058  | 5.07221542  | 1.71178622  |
| C | 2.56031505  | 5.72496288  | 2.55177400  |
| C | 2.57629640  | 7.12441826  | 2.56679053  |
| C | 1.72715998  | 7.84255923  | 1.71873767  |
| O | 3.30092537  | 5.09955437  | 3.29143861  |
| B | 3.66187609  | 7.78298868  | 3.64993108  |
| F | 4.39501394  | 6.82809579  | 4.38235721  |
| F | 3.67839951  | 9.19242854  | 3.66548201  |
| B | -1.87492443 | 4.94364109  | -1.87477635 |
| H | -1.51078171 | 7.72817984  | -1.51316532 |
| H | 0.01644550  | 8.95356000  | 0.01043066  |
| H | 1.73999253  | 8.93628735  | 1.73081555  |
| C | 1.71261932  | -1.72163191 | 7.84921168  |
| C | 0.00000000  | 0.00000000  | 7.86346437  |
| C | 2.55979964  | -2.57324399 | 7.13250833  |
| C | 0.85138892  | -0.85585778 | 7.16678932  |
| C | -0.85186005 | 0.85631198  | 7.16756877  |
| C | 2.54533688  | -2.55869369 | 5.73304110  |
| C | 0.85239936  | -0.85686860 | 5.77627780  |
| C | -0.85326071 | 0.85772779  | 5.77713568  |
| C | -0.00028150 | 0.00027256  | 5.07590291  |
| O | 1.70711511  | -1.71605838 | 5.07888476  |
| O | 3.28406975  | -3.30129242 | 5.10889086  |
| H | 1.72414872  | -1.73319106 | 8.94297600  |
| H | 0.00668056  | -0.00671498 | 8.95733072  |
| B | 3.64057594  | -3.65967980 | 7.79293679  |
| H | -1.51371400 | 1.52164117  | 7.72936440  |
| B | -1.87327962 | 1.88310386  | 4.94423333  |
| F | 4.37224537  | -4.39518736 | 6.83929068  |
| F | 3.65538739  | -3.67456539 | 9.20240250  |
| O | 5.08087469  | -1.71831757 | 1.69890138  |
| O | 5.11272795  | -3.30251694 | 3.27685922  |
| C | 7.13549312  | -2.57630803 | 2.54837377  |

|   |             |             |             |
|---|-------------|-------------|-------------|
| H | -0.00467563 | -5.43227820 | 1.01719368  |
| H | -0.88618997 | -5.54326193 | -0.41792265 |
| H | 0.87743529  | -5.53817138 | -0.41794072 |
| H | -5.33938817 | 0.00818571  | -1.02218243 |
| H | 0.86749114  | 0.44073250  | -5.43483467 |
| H | -5.43045891 | -0.87367249 | 0.43191152  |
| H | -0.01380144 | -1.01361636 | -5.34236976 |
| H | -5.43132480 | 0.88995991  | 0.43190797  |
| H | -0.89611036 | 0.44074462  | -5.42435816 |
| F | 4.65550053  | 3.19774429  | -1.47658399 |
| F | 4.43796793  | 1.39755669  | -3.10948564 |
| F | -3.17315302 | 1.45842343  | 4.60061191  |
| F | -1.45644432 | 3.19410813  | 4.63501477  |
| F | -1.56620905 | 4.83400624  | -3.24618985 |
| F | -3.06686494 | 4.38119313  | -1.37374730 |
| H | 3.67384893  | 0.57008911  | 6.69744952  |
| H | 3.15490186  | 1.02283000  | 6.38761639  |
| C | 3.31616055  | 2.08799465  | 3.22104261  |
| O | 4.25647094  | 2.05062090  | 2.52180965  |
| O | 2.37023398  | 2.09230719  | 3.91343241  |

**Figure14\_c**

94

|    |             |             |             |
|----|-------------|-------------|-------------|
| Zn | 1.11832588  | -1.12823526 | 1.11702073  |
| O  | 0.00000000  | 0.00000000  | 0.00000000  |
| Zn | -1.11690035 | 1.12047199  | 1.12350596  |
| Zn | 1.12219394  | 1.11897262  | -1.11971895 |
| Zn | -1.12621595 | -1.11650539 | -1.12339591 |
| O  | 0.80213697  | -0.81178373 | 3.00875080  |
| C  | 0.00305483  | -0.00843257 | 3.58191925  |
| O  | -0.79708182 | 0.79703132  | 3.01323421  |
| C  | 3.58191236  | -0.01082909 | -0.00354043 |
| O  | 3.00968100  | -0.81326198 | 0.79713438  |
| O  | 3.01229190  | 0.79448044  | -0.80316691 |
| C  | 0.00918028  | 3.58138347  | 0.00676958  |
| O  | 0.80842204  | 3.01007489  | -0.79661456 |
| O  | -3.00902029 | 0.80786599  | 0.80608208  |
| C  | -0.00334651 | 0.00665239  | -3.58357973 |
| O  | -0.80714607 | -0.79471572 | -3.01421696 |
| O  | 0.80107402  | 0.80531462  | -3.01104096 |
| C  | -3.58357456 | 0.00904983  | 0.00325300  |
| O  | -3.01623016 | -0.79323645 | -0.80105763 |
| O  | -0.79311094 | 3.01114733  | 0.80787288  |
| C  | -0.01001744 | -3.58523958 | -0.00760262 |

|   |             |             |             |
|---|-------------|-------------|-------------|
| O | -0.81097469 | -3.01160387 | -0.80746843 |
| O | 0.79382786  | -3.01813380 | 0.79438345  |
| C | -0.00571474 | -5.07589619 | -0.00231149 |
| H | 8.94497845  | -1.73802636 | 1.70882553  |
| C | 7.16655713  | 0.85094258  | -0.86564050 |
| H | 7.56929725  | -3.28838819 | 3.25660525  |
| C | -4.98356264 | 0.00836246  | -0.00248239 |
| C | 5.73601164  | -2.56083027 | 2.53648029  |
| C | 5.77726518  | -0.86016645 | 0.84232676  |
| H | 7.72757640  | 1.51545290  | -1.52897402 |
| B | 4.94202950  | 1.87854011  | -1.88364843 |
| C | 5.77612508  | 0.85328853  | -0.86447976 |
| H | 2.35711156  | 2.84980607  | 4.46904492  |
| F | -3.17315302 | 1.45842343  | 4.60061191  |
| C | -0.01166294 | 0.00503311  | -4.98355409 |
| C | 5.07589281  | -0.00312662 | -0.00963575 |
| H | 8.95732133  | -0.01270863 | -0.00982188 |
| C | 7.16777284  | -0.86008744 | 0.83875315  |
| C | 7.85120270  | -1.72574250 | 1.69930404  |
| C | 7.86344925  | -0.00526563 | -0.01449110 |
| C | 0.04396636  | 5.19464087  | 0.04041330  |
| C | -0.85030166 | 5.77481866  | -0.85259583 |
| C | -0.84723648 | 7.16525704  | -0.85046567 |
| C | 0.00845759  | 7.85969098  | 0.00318860  |
| C | 0.86231933  | 7.16141583  | 0.85594479  |
| C | 0.86141534  | 5.77106764  | 0.85597177  |
| O | 1.71834058  | 5.07221542  | 1.71178622  |
| C | 2.56031505  | 5.72496288  | 2.55177400  |
| C | 2.57629640  | 7.12441826  | 2.56679053  |
| C | 1.72715998  | 7.84255923  | 1.71873767  |
| O | 3.30092537  | 5.09955437  | 3.29143861  |
| H | 3.28789632  | 7.55611265  | 3.27679159  |
| F | -3.06686494 | 4.38119313  | -1.37374730 |
| H | 2.04506554  | 2.28570622  | 4.86343184  |
| B | -1.87492443 | 4.94364109  | -1.87477635 |
| H | -1.51078171 | 7.72817984  | -1.51316532 |
| H | 0.01644550  | 8.95356000  | 0.01043066  |
| H | 1.73999253  | 8.93628735  | 1.73081555  |
| C | 1.71261932  | -1.72163191 | 7.84921168  |
| C | 0.00000000  | 0.00000000  | 7.86346437  |
| C | 2.55979964  | -2.57324399 | 7.13250833  |
| C | 0.85138892  | -0.85585778 | 7.16678932  |
| C | -0.85186005 | 0.85631198  | 7.16756877  |
| C | 2.54533688  | -2.55869369 | 5.73304110  |
| C | 0.85239936  | -0.85686860 | 5.77627780  |
| C | -0.85326071 | 0.85772779  | 5.77713568  |
| C | -0.00028150 | 0.00027256  | 5.07590291  |
| O | 1.70711511  | -1.71605838 | 5.07888476  |

|   |             |             |             |
|---|-------------|-------------|-------------|
| O | 3.28406975  | -3.30129242 | 5.10889086  |
| H | 1.72414872  | -1.73319106 | 8.94297600  |
| H | 0.00668056  | -0.00671498 | 8.95733072  |
| H | 3.26835343  | -3.28550813 | 7.56548331  |
| H | -1.51371400 | 1.52164117  | 7.72936440  |
| B | -1.87327962 | 1.88310386  | 4.94423333  |
| F | -1.45644432 | 3.19410813  | 4.63501477  |
| F | -1.56620905 | 4.83400624  | -3.24618985 |
| O | 5.08087469  | -1.71831757 | 1.69890138  |
| O | 5.11272795  | -3.30251694 | 3.27685922  |
| C | 7.13549312  | -2.57630803 | 2.54837377  |
| H | -0.00467563 | -5.43227820 | 1.01719368  |
| H | -0.88618997 | -5.54326193 | -0.41792265 |
| H | 0.87743529  | -5.53817138 | -0.41794072 |
| H | -5.33938817 | 0.00818571  | -1.02218243 |
| H | 0.86749114  | 0.44073250  | -5.43483467 |
| H | -5.43045891 | -0.87367249 | 0.43191152  |
| H | -0.01380144 | -1.01361636 | -5.34236976 |
| H | -5.43132480 | 0.88995991  | 0.43190797  |
| H | -0.89611036 | 0.44074462  | -5.42435816 |
| F | 4.65550053  | 3.19774429  | -1.47658399 |
| F | 4.43796793  | 1.39755669  | -3.10948564 |
| C | 4.74661749  | 0.28278808  | 4.78233140  |
| O | 5.38017997  | 0.43711011  | 3.81058865  |
| O | 4.12575807  | 0.13828176  | 5.76426520  |

**Figure17**

103

|    |             |             |             |
|----|-------------|-------------|-------------|
| Zn | 1.11832588  | -1.12823526 | 1.11702073  |
| O  | 0.00000000  | 0.00000000  | 0.00000000  |
| Zn | -1.11690035 | 1.12047199  | 1.12350596  |
| Zn | 1.12219394  | 1.11897262  | -1.11971895 |
| Zn | -1.12621595 | -1.11650539 | -1.12339591 |
| O  | 0.80213697  | -0.81178373 | 3.00875080  |
| C  | 0.00305483  | -0.00843257 | 3.58191925  |
| O  | -0.79708182 | 0.79703132  | 3.01323421  |
| C  | 3.58191236  | -0.01082909 | -0.00354043 |
| O  | 3.00968100  | -0.81326198 | 0.79713438  |
| O  | 3.01229190  | 0.79448044  | -0.80316691 |
| C  | 0.00918028  | 3.58138347  | 0.00676958  |
| O  | 0.80842204  | 3.01007489  | -0.79661456 |
| O  | -3.00902029 | 0.80786599  | 0.80608208  |
| C  | -0.00334651 | 0.00665239  | -3.58357973 |
| O  | -0.80714607 | -0.79471572 | -3.01421696 |

|   |             |             |             |
|---|-------------|-------------|-------------|
| O | 0.80107402  | 0.80531462  | -3.01104096 |
| C | -3.58357456 | 0.00904983  | 0.00325300  |
| O | -3.01623016 | -0.79323645 | -0.80105763 |
| O | -0.79311094 | 3.01114733  | 0.80787288  |
| C | -0.01001744 | -3.58523958 | -0.00760262 |
| O | -0.81097469 | -3.01160387 | -0.80746843 |
| O | 0.79382786  | -3.01813380 | 0.79438345  |
| C | -0.00571474 | -5.07589619 | -0.00231149 |
| H | 8.94497845  | -1.73802636 | 1.70882553  |
| C | 7.16655713  | 0.85094258  | -0.86564050 |
| C | 7.73346078  | -3.55785911 | 3.52461972  |
| C | -4.98356264 | 0.00836246  | -0.00248239 |
| C | 5.73601164  | -2.56083027 | 2.53648029  |
| C | 5.77726518  | -0.86016645 | 0.84232676  |
| H | 7.72757640  | 1.51545290  | -1.52897402 |
| H | 5.22941714  | 1.52528967  | -1.53249386 |
| C | 5.77612508  | 0.85328853  | -0.86447976 |
| F | 6.18673169  | -4.01602009 | 5.52094577  |
| H | -0.89611036 | 0.44074462  | -5.42435816 |
| C | -0.01166294 | 0.00503311  | -4.98355409 |
| C | 5.07589281  | -0.00312662 | -0.00963575 |
| H | 8.95732133  | -0.01270863 | -0.00982188 |
| C | 7.16777284  | -0.86008744 | 0.83875315  |
| C | 7.85120270  | -1.72574250 | 1.69930404  |
| C | 7.86344925  | -0.00526563 | -0.01449110 |
| C | 0.04396636  | 5.19464087  | 0.04041330  |
| C | -0.85030166 | 5.77481866  | -0.85259583 |
| C | -0.84723648 | 7.16525704  | -0.85046567 |
| C | 0.00845759  | 7.85969098  | 0.00318860  |
| C | 0.86231933  | 7.16141583  | 0.85594479  |
| C | 0.86141534  | 5.77106764  | 0.85597177  |
| O | 1.71834058  | 5.07221542  | 1.71178622  |
| C | 2.56031505  | 5.72496288  | 2.55177400  |
| C | 2.57629640  | 7.12441826  | 2.56679053  |
| C | 1.72715998  | 7.84255923  | 1.71873767  |
| O | 3.30092537  | 5.09955437  | 3.29143861  |
| C | 3.55718551  | 7.71947780  | 3.54547572  |
| H | 3.56871125  | -4.46551083 | 7.11142612  |
| H | 3.20536258  | -3.85885368 | 8.73828478  |
| H | -1.52187739 | 5.23003409  | -1.52257081 |
| H | -1.51078171 | 7.72817984  | -1.51316532 |
| H | 0.01644550  | 8.95356000  | 0.01043066  |
| H | 1.73999253  | 8.93628735  | 1.73081555  |
| C | 1.71261932  | -1.72163191 | 7.84921168  |
| C | 0.00000000  | 0.00000000  | 7.86346437  |
| C | 2.55979964  | -2.57324399 | 7.13250833  |
| C | 0.85138892  | -0.85585778 | 7.16678932  |
| C | -0.85186005 | 0.85631198  | 7.16756877  |



|   |             |             |             |
|---|-------------|-------------|-------------|
| C | 2.54533688  | -2.55869369 | 5.73304110  |
| C | 0.85239936  | -0.85686860 | 5.77627780  |
| C | -0.85326071 | 0.85772779  | 5.77713568  |
| C | -0.00028150 | 0.00027256  | 5.07590291  |
| O | 1.70711511  | -1.71605838 | 5.07888476  |
| O | 3.28406975  | -3.30129242 | 5.10889086  |
| H | 1.72414872  | -1.73319106 | 8.94297600  |
| H | 0.00668056  | -0.00671498 | 8.95733072  |
| C | 3.53648987  | -3.55504868 | 7.72933306  |
| H | -1.51371400 | 1.52164117  | 7.72936440  |
| H | -1.52183211 | 1.52981054  | 5.23120984  |
| H | 8.33684340  | -3.02058490 | 4.27332473  |
| H | 8.39306038  | -4.26450035 | 2.99773543  |
| O | 5.08087469  | -1.71831757 | 1.69890138  |
| O | 5.11272795  | -3.30251694 | 3.27685922  |
| C | 7.13549312  | -2.57630803 | 2.54837377  |
| H | 0.87743529  | -5.53817138 | -0.41794072 |
| H | -0.88618997 | -5.54326193 | -0.41792265 |
| H | -0.00467563 | -5.43227820 | 1.01719368  |
| H | -5.33938817 | 0.00818571  | -1.02218243 |
| H | 0.86749114  | 0.44073250  | -5.43483467 |
| H | -5.43045891 | -0.87367249 | 0.43191152  |
| H | -0.01380144 | -1.01361636 | -5.34236976 |
| H | -5.43132480 | 0.88995991  | 0.43190797  |
| B | 6.45882376  | -4.30393472 | 4.20872140  |
| F | 6.14646445  | -5.57412199 | 3.81517588  |
| F | 5.37992157  | -1.78076178 | 7.48358755  |
| F | 5.94667886  | -3.75164753 | 8.49721973  |
| B | 5.01811061  | -3.01400360 | 7.86677065  |
| F | 3.38215736  | 6.23581028  | 5.62611031  |
| F | 5.39275324  | 6.17684181  | 4.48965992  |
| B | 4.07700750  | 6.51563685  | 4.48847661  |
| H | 3.07518463  | 8.52165655  | 4.12534494  |
| H | 4.39940496  | 8.16692322  | 2.99057428  |
| H | 2.72512951  | 2.04510684  | 3.62475304  |
| H | 2.74723214  | 1.29459947  | 3.54074675  |
| C | 5.47018927  | 3.14129219  | 1.69125369  |
| O | 5.14104097  | 3.97623518  | 0.93803532  |
| O | 5.80820447  | 2.29792763  | 2.42822450  |

# FigureS1\_CBF2

24

|   |             |             |            |
|---|-------------|-------------|------------|
| C | 0.55186846  | -1.68406980 | 0.00000000 |
| C | -1.90865255 | -1.22778511 | 0.00000000 |

|   |             |             |             |
|---|-------------|-------------|-------------|
| C | 1.84567584  | -1.23260413 | 0.00000000  |
| C | -0.56553751 | -0.79626727 | 0.00000000  |
| C | -2.94248686 | -0.30558128 | 0.00000000  |
| C | 2.11830683  | 0.20723186  | 0.00000000  |
| C | -0.29624392 | 0.58937088  | 0.00000000  |
| C | -2.64988260 | 1.06890826  | 0.00000000  |
| C | -1.33640368 | 1.52269848  | 0.00000000  |
| O | 0.97726463  | 1.06574486  | 0.00000000  |
| O | 3.19434895  | 0.75083680  | 0.00000000  |
| H | 0.36087964  | -2.76075424 | 0.00000000  |
| H | -2.11720802 | -2.29911935 | 0.00000000  |
| B | 3.01375519  | -2.25891317 | 0.00000000  |
| H | -3.97927948 | -0.64171345 | 0.00000000  |
| H | -3.46420753 | 1.79496074  | 0.00000000  |
| H | -1.09272945 | 2.58522933  | 0.00000000  |
| F | 2.72317686  | -3.57219154 | 0.00000000  |
| F | 4.30075431  | -1.92472277 | 0.00000000  |
| H | 3.71040124  | 0.70439814  | -2.59836890 |
| H | 3.64910618  | 0.66672274  | -3.35112939 |
| C | 4.22992688  | -2.21341353 | -4.11317570 |
| O | 4.26120904  | -1.74478046 | -5.18507581 |
| O | 4.19885418  | -2.68652369 | -3.04267108 |

**FigureS1\_IRMOCCBF2**

94

|    |             |             |             |
|----|-------------|-------------|-------------|
| Zn | 1.11832588  | -1.12823526 | 1.11702073  |
| O  | 0.00000000  | 0.00000000  | 0.00000000  |
| Zn | -1.11690035 | 1.12047199  | 1.12350596  |
| Zn | 1.12219394  | 1.11897262  | -1.11971895 |
| Zn | -1.12621595 | -1.11650539 | -1.12339591 |
| O  | 0.80213697  | -0.81178373 | 3.00875080  |
| C  | 0.00305483  | -0.00843257 | 3.58191925  |
| O  | -0.79708182 | 0.79703132  | 3.01323421  |
| C  | 3.58191236  | -0.01082909 | -0.00354043 |
| O  | 3.00968100  | -0.81326198 | 0.79713438  |
| O  | 3.01229190  | 0.79448044  | -0.80316691 |
| C  | 0.00918028  | 3.58138347  | 0.00676958  |
| O  | 0.80842204  | 3.01007489  | -0.79661456 |
| O  | -3.00902029 | 0.80786599  | 0.80608208  |
| C  | -0.00334651 | 0.00665239  | -3.58357973 |
| O  | -0.80714607 | -0.79471572 | -3.01421696 |
| O  | 0.80107402  | 0.80531462  | -3.01104096 |
| C  | -3.58357456 | 0.00904983  | 0.00325300  |
| O  | -3.01623016 | -0.79323645 | -0.80105763 |

|   |             |             |             |
|---|-------------|-------------|-------------|
| O | -0.79311094 | 3.01114733  | 0.80787288  |
| C | -0.01001744 | -3.58523958 | -0.00760262 |
| O | -0.81097469 | -3.01160387 | -0.80746843 |
| O | 0.79382786  | -3.01813380 | 0.79438345  |
| C | -0.00571474 | -5.07589619 | -0.00231149 |
| H | 8.94497845  | -1.73802636 | 1.70882553  |
| C | 7.16655713  | 0.85094258  | -0.86564050 |
| B | 7.79718631  | -3.66246319 | 3.62865844  |
| C | -4.98356264 | 0.00836246  | -0.00248239 |
| C | 5.73601164  | -2.56083027 | 2.53648029  |
| C | 5.77726518  | -0.86016645 | 0.84232676  |
| H | 7.72757640  | 1.51545290  | -1.52897402 |
| H | 5.22941714  | 1.52528967  | -1.53249386 |
| C | 5.77612508  | 0.85328853  | -0.86447976 |
| F | 6.84439910  | -4.39684279 | 4.36257641  |
| F | 9.20666666  | -3.67828270 | 3.64088242  |
| C | -0.01166294 | 0.00503311  | -4.98355409 |
| C | 5.07589281  | -0.00312662 | -0.00963575 |
| H | 8.95732133  | -0.01270863 | -0.00982188 |
| C | 7.16777284  | -0.86008744 | 0.83875315  |
| C | 7.85120270  | -1.72574250 | 1.69930404  |
| C | 7.86344925  | -0.00526563 | -0.01449110 |
| C | 0.04396636  | 5.19464087  | 0.04041330  |
| C | -0.85030166 | 5.77481866  | -0.85259583 |
| C | -0.84723648 | 7.16525704  | -0.85046567 |
| C | 0.00845759  | 7.85969098  | 0.00318860  |
| C | 0.86231933  | 7.16141583  | 0.85594479  |
| C | 0.86141534  | 5.77106764  | 0.85597177  |
| O | 1.71834058  | 5.07221542  | 1.71178622  |
| C | 2.56031505  | 5.72496288  | 2.55177400  |
| C | 2.57629640  | 7.12441826  | 2.56679053  |
| C | 1.72715998  | 7.84255923  | 1.71873767  |
| O | 3.30092537  | 5.09955437  | 3.29143861  |
| B | 3.66187609  | 7.78298868  | 3.64993108  |
| F | 4.39501394  | 6.82809579  | 4.38235721  |
| F | 3.67839951  | 9.19242854  | 3.66548201  |
| H | -1.52187739 | 5.23003409  | -1.52257081 |
| H | -1.51078171 | 7.72817984  | -1.51316532 |
| H | 0.01644550  | 8.95356000  | 0.01043066  |
| H | 1.73999253  | 8.93628735  | 1.73081555  |
| C | 1.71261932  | -1.72163191 | 7.84921168  |
| C | 0.00000000  | 0.00000000  | 7.86346437  |
| C | 2.55979964  | -2.57324399 | 7.13250833  |
| C | 0.85138892  | -0.85585778 | 7.16678932  |
| C | -0.85186005 | 0.85631198  | 7.16756877  |
| C | 2.54533688  | -2.55869369 | 5.73304110  |
| C | 0.85239936  | -0.85686860 | 5.77627780  |
| C | -0.85326071 | 0.85772779  | 5.77713568  |

|   |             |             |             |
|---|-------------|-------------|-------------|
| C | -0.00028150 | 0.00027256  | 5.07590291  |
| O | 1.70711511  | -1.71605838 | 5.07888476  |
| O | 3.28406975  | -3.30129242 | 5.10889086  |
| H | 1.72414872  | -1.73319106 | 8.94297600  |
| H | 0.00668056  | -0.00671498 | 8.95733072  |
| B | 3.64057594  | -3.65967980 | 7.79293679  |
| H | -1.51371400 | 1.52164117  | 7.72936440  |
| H | -1.52183211 | 1.52981054  | 5.23120984  |
| F | 4.37224537  | -4.39518736 | 6.83929068  |
| F | 3.65538739  | -3.67456539 | 9.20240250  |
| O | 5.08087469  | -1.71831757 | 1.69890138  |
| O | 5.11272795  | -3.30251694 | 3.27685922  |
| C | 7.13549312  | -2.57630803 | 2.54837377  |
| H | 0.87743529  | -5.53817138 | -0.41794072 |
| H | -0.88618997 | -5.54326193 | -0.41792265 |
| H | -0.00467563 | -5.43227820 | 1.01719368  |
| H | -5.33938817 | 0.00818571  | -1.02218243 |
| H | 0.86749114  | 0.44073250  | -5.43483467 |
| H | -5.43045891 | -0.87367249 | 0.43191152  |
| H | -0.01380144 | -1.01361636 | -5.34236976 |
| H | -5.43132480 | 0.88995991  | 0.43190797  |
| H | -0.89611036 | 0.44074462  | -5.42435816 |
| H | -4.25842155 | 2.97668432  | -7.39379008 |
| H | -4.50456049 | 2.84660068  | -8.09570539 |
| C | 0.20254113  | 3.78729062  | -3.89705119 |
| O | -0.91897523 | 3.47770644  | -3.74599911 |
| O | 1.31872693  | 4.09083824  | -4.07738232 |

**FigureS5\_a1**

94

|    |             |             |             |
|----|-------------|-------------|-------------|
| Zn | 1.11832588  | -1.12823526 | 1.11702073  |
| O  | 0.00000000  | 0.00000000  | 0.00000000  |
| Zn | -1.11690035 | 1.12047199  | 1.12350596  |
| Zn | 1.12219395  | 1.11897262  | -1.11971895 |
| Zn | -1.12621595 | -1.11650539 | -1.12339591 |
| O  | 0.80213697  | -0.81178373 | 3.00875080  |
| C  | 0.00305483  | -0.00843257 | 3.58191925  |
| O  | -0.79708182 | 0.79703132  | 3.01323421  |
| C  | 3.58191236  | -0.01082909 | -0.00354043 |
| O  | 3.00968100  | -0.81326198 | 0.79713438  |
| O  | 3.01229190  | 0.79448044  | -0.80316691 |
| C  | 0.00918028  | 3.58138347  | 0.00676958  |
| O  | 0.80842204  | 3.01007489  | -0.79661456 |
| O  | -3.00902029 | 0.80786599  | 0.80608208  |

|   |             |             |             |
|---|-------------|-------------|-------------|
| C | -0.00334651 | 0.00665239  | -3.58357973 |
| O | -0.80714607 | -0.79471572 | -3.01421696 |
| O | 0.80107402  | 0.80531462  | -3.01104096 |
| C | -3.58357456 | 0.00904983  | 0.00325300  |
| O | -3.01623017 | -0.79323645 | -0.80105763 |
| O | -0.79311094 | 3.01114733  | 0.80787288  |
| C | -0.01001744 | -3.58523958 | -0.00760262 |
| O | -0.81097469 | -3.01160387 | -0.80746843 |
| O | 0.79382786  | -3.01813380 | 0.79438345  |
| C | -0.00571474 | -5.07589619 | -0.00231149 |
| H | 8.94497845  | -1.73802636 | 1.70882553  |
| C | 7.16655713  | 0.85094258  | -0.86564050 |
| B | 7.79718631  | -3.66246319 | 3.62865844  |
| C | -4.98356264 | 0.00836246  | -0.00248239 |
| C | 5.73601164  | -2.56083027 | 2.53648029  |
| C | 5.77726518  | -0.86016645 | 0.84232676  |
| H | 7.72757640  | 1.51545290  | -1.52897402 |
| H | 5.22941714  | 1.52528967  | -1.53249386 |
| C | 5.77612508  | 0.85328853  | -0.86447976 |
| F | 6.84439910  | -4.39684279 | 4.36257641  |
| F | 9.20666666  | -3.67828270 | 3.64088242  |
| C | -0.01166294 | 0.00503311  | -4.98355409 |
| C | 5.07589281  | -0.00312662 | -0.00963575 |
| H | 8.95732133  | -0.01270863 | -0.00982188 |
| C | 7.16777284  | -0.86008744 | 0.83875315  |
| C | 7.85120270  | -1.72574250 | 1.69930405  |
| C | 7.86344925  | -0.00526563 | -0.01449110 |
| C | 0.04396636  | 5.19464087  | 0.04041330  |
| C | -0.85030166 | 5.77481866  | -0.85259583 |
| C | -0.84723648 | 7.16525704  | -0.85046567 |
| C | 0.00845759  | 7.85969098  | 0.00318860  |
| C | 0.86231933  | 7.16141583  | 0.85594479  |
| C | 0.86141534  | 5.77106764  | 0.85597177  |
| O | 1.71834058  | 5.07221542  | 1.71178622  |
| C | 2.56031505  | 5.72496288  | 2.55177400  |
| C | 2.57629640  | 7.12441826  | 2.56679053  |
| C | 1.72715998  | 7.84255923  | 1.71873767  |
| O | 3.30092537  | 5.09955437  | 3.29143861  |
| B | 3.66187609  | 7.78298868  | 3.64993108  |
| F | 4.39501394  | 6.82809579  | 4.38235721  |
| F | 3.67839951  | 9.19242854  | 3.66548201  |
| H | -1.52187739 | 5.23003409  | -1.52257081 |
| H | -1.51078171 | 7.72817984  | -1.51316532 |
| H | 0.01644550  | 8.95356000  | 0.01043066  |
| H | 1.73999253  | 8.93628735  | 1.73081555  |
| C | 1.71261932  | -1.72163191 | 7.84921168  |
| C | 0.00000000  | 0.00000000  | 7.86346437  |
| C | 2.55979964  | -2.57324399 | 7.13250833  |

|   |             |             |             |
|---|-------------|-------------|-------------|
| C | 0.85138892  | -0.85585778 | 7.16678932  |
| C | -0.85186005 | 0.85631198  | 7.16756877  |
| C | 2.54533688  | -2.55869369 | 5.73304110  |
| C | 0.85239936  | -0.85686860 | 5.77627780  |
| C | -0.85326071 | 0.85772779  | 5.77713568  |
| C | -0.00028150 | 0.00027256  | 5.07590291  |
| O | 1.70711511  | -1.71605838 | 5.07888476  |
| O | 3.28406975  | -3.30129242 | 5.10889086  |
| H | 1.72414872  | -1.73319106 | 8.94297600  |
| H | 0.00668056  | -0.00671498 | 8.95733072  |
| B | 3.64057594  | -3.65967980 | 7.79293679  |
| H | -1.51371401 | 1.52164117  | 7.72936440  |
| H | -1.52183211 | 1.52981054  | 5.23120984  |
| F | 4.37224537  | -4.39518736 | 6.83929068  |
| F | 3.65538739  | -3.67456539 | 9.20240250  |
| O | 5.08087469  | -1.71831757 | 1.69890139  |
| O | 5.11272795  | -3.30251694 | 3.27685922  |
| C | 7.13549312  | -2.57630803 | 2.54837377  |
| H | 0.87743529  | -5.53817138 | -0.41794072 |
| H | -0.88618997 | -5.54326193 | -0.41792265 |
| H | -0.00467563 | -5.43227820 | 1.01719368  |
| H | -5.33938817 | 0.00818571  | -1.02218243 |
| H | 0.86749114  | 0.44073250  | -5.43483467 |
| H | -5.43045891 | -0.87367249 | 0.43191152  |
| H | -0.01380144 | -1.01361636 | -5.34236976 |
| H | -5.43132480 | 0.88995991  | 0.43190797  |
| H | -0.89611036 | 0.44074462  | -5.42435816 |
| H | -2.73049844 | 6.00647153  | -4.03506417 |
| H | -1.99657974 | 5.83125372  | -4.09542025 |
| C | 1.24400403  | 5.74425948  | -2.84530921 |
| O | 0.91220777  | 4.99073146  | -3.87871519 |
| O | 2.47601841  | 5.99700813  | -2.45096957 |

**FigureS5\_a2**

94

|    |             |             |             |
|----|-------------|-------------|-------------|
| Zn | 1.11832588  | -1.12823526 | 1.11702073  |
| O  | 0.00000000  | 0.00000000  | 0.00000000  |
| Zn | -1.11690035 | 1.12047199  | 1.12350596  |
| Zn | 1.12219395  | 1.11897262  | -1.11971895 |
| Zn | -1.12621595 | -1.11650539 | -1.12339591 |
| O  | 0.80213697  | -0.81178373 | 3.00875080  |
| C  | 0.00305483  | -0.00843257 | 3.58191925  |
| O  | -0.79708182 | 0.79703132  | 3.01323421  |
| C  | 3.58191236  | -0.01082909 | -0.00354043 |

|   |             |             |             |
|---|-------------|-------------|-------------|
| O | 3.00968100  | -0.81326198 | 0.79713438  |
| O | 3.01229190  | 0.79448044  | -0.80316691 |
| C | 0.00918028  | 3.58138347  | 0.00676958  |
| O | 0.80842204  | 3.01007489  | -0.79661456 |
| O | -3.00902029 | 0.80786599  | 0.80608208  |
| C | -0.00334651 | 0.00665239  | -3.58357973 |
| O | -0.80714607 | -0.79471572 | -3.01421696 |
| O | 0.80107402  | 0.80531462  | -3.01104096 |
| C | -3.58357456 | 0.00904983  | 0.00325300  |
| O | -3.01623017 | -0.79323645 | -0.80105763 |
| O | -0.79311094 | 3.01114733  | 0.80787288  |
| C | -0.01001744 | -3.58523958 | -0.00760262 |
| O | -0.81097469 | -3.01160387 | -0.80746843 |
| O | 0.79382786  | -3.01813380 | 0.79438345  |
| C | -0.00571474 | -5.07589619 | -0.00231149 |
| H | 8.94497845  | -1.73802636 | 1.70882553  |
| C | 7.16655713  | 0.85094258  | -0.86564050 |
| B | 7.79718631  | -3.66246319 | 3.62865844  |
| C | -4.98356264 | 0.00836246  | -0.00248239 |
| C | 5.73601164  | -2.56083027 | 2.53648029  |
| C | 5.77726518  | -0.86016645 | 0.84232676  |
| H | 7.72757640  | 1.51545290  | -1.52897402 |
| H | 5.22941714  | 1.52528967  | -1.53249386 |
| C | 5.77612508  | 0.85328853  | -0.86447976 |
| F | 6.84439910  | -4.39684279 | 4.36257641  |
| F | 9.20666666  | -3.67828270 | 3.64088242  |
| C | -0.01166294 | 0.00503311  | -4.98355409 |
| C | 5.07589281  | -0.00312662 | -0.00963575 |
| H | 8.95732133  | -0.01270863 | -0.00982188 |
| C | 7.16777284  | -0.86008744 | 0.83875315  |
| C | 7.85120270  | -1.72574250 | 1.69930405  |
| C | 7.86344925  | -0.00526563 | -0.01449110 |
| C | 0.04396636  | 5.19464087  | 0.04041330  |
| C | -0.85030166 | 5.77481866  | -0.85259583 |
| C | -0.84723648 | 7.16525704  | -0.85046567 |
| C | 0.00845759  | 7.85969098  | 0.00318860  |
| C | 0.86231933  | 7.16141583  | 0.85594479  |
| C | 0.86141534  | 5.77106764  | 0.85597177  |
| O | 1.71834058  | 5.07221542  | 1.71178622  |
| C | 2.56031505  | 5.72496288  | 2.55177400  |
| C | 2.57629640  | 7.12441826  | 2.56679053  |
| C | 1.72715998  | 7.84255923  | 1.71873767  |
| O | 3.30092537  | 5.09955437  | 3.29143861  |
| B | 3.66187609  | 7.78298868  | 3.64993108  |
| F | 4.39501394  | 6.82809579  | 4.38235721  |
| F | 3.67839951  | 9.19242854  | 3.66548201  |
| H | -1.52187739 | 5.23003409  | -1.52257081 |
| H | -1.51078171 | 7.72817984  | -1.51316532 |

|   |             |             |             |
|---|-------------|-------------|-------------|
| H | 0.01644550  | 8.95356000  | 0.01043066  |
| H | 1.73999253  | 8.93628735  | 1.73081555  |
| C | 1.71261932  | -1.72163191 | 7.84921168  |
| C | 0.00000000  | 0.00000000  | 7.86346437  |
| C | 2.55979964  | -2.57324399 | 7.13250833  |
| C | 0.85138892  | -0.85585778 | 7.16678932  |
| C | -0.85186005 | 0.85631198  | 7.16756877  |
| C | 2.54533688  | -2.55869369 | 5.73304110  |
| C | 0.85239936  | -0.85686860 | 5.77627780  |
| C | -0.85326071 | 0.85772779  | 5.77713568  |
| C | -0.00028150 | 0.00027256  | 5.07590291  |
| O | 1.70711511  | -1.71605838 | 5.07888476  |
| O | 3.28406975  | -3.30129242 | 5.10889086  |
| H | 1.72414872  | -1.73319106 | 8.94297600  |
| H | 0.00668056  | -0.00671498 | 8.95733072  |
| B | 3.64057594  | -3.65967980 | 7.79293679  |
| H | -1.51371401 | 1.52164117  | 7.72936440  |
| H | -1.52183211 | 1.52981054  | 5.23120984  |
| F | 4.37224537  | -4.39518736 | 6.83929068  |
| F | 3.65538739  | -3.67456539 | 9.20240250  |
| O | 5.08087469  | -1.71831757 | 1.69890139  |
| O | 5.11272795  | -3.30251694 | 3.27685922  |
| C | 7.13549312  | -2.57630803 | 2.54837377  |
| H | 0.87743529  | -5.53817138 | -0.41794072 |
| H | -0.88618997 | -5.54326193 | -0.41792265 |
| H | -0.00467563 | -5.43227820 | 1.01719368  |
| H | -5.33938817 | 0.00818571  | -1.02218243 |
| H | 0.86749114  | 0.44073250  | -5.43483467 |
| H | -5.43045891 | -0.87367249 | 0.43191152  |
| H | -0.01380144 | -1.01361636 | -5.34236976 |
| H | -5.43132480 | 0.88995991  | 0.43190797  |
| H | -0.89611036 | 0.44074462  | -5.42435816 |
| H | -2.69511614 | 5.89621390  | -4.13509662 |
| H | -2.24800687 | 6.04218884  | -4.41780917 |
| C | 1.50588015  | 5.51802266  | -3.02978330 |
| O | 0.70565450  | 4.98154328  | -3.71971965 |
| O | 2.31081017  | 6.07186956  | -2.37960713 |

**FigureS5\_a3**

94

Frame 7: Geometry 8, SCF Bond Energy: -22.23468 Hartree

Zn 1.118325877 -1.128235255 1.117020731

O 0.0 0.0 0.0

Zn -1.116900352 1.12047199 1.123505959

Zn 1.122193945 1.118972622 -1.119718947



Zn -1.126215951 -1.116505389 -1.12339591  
O 0.8021369693 -0.8117837309 3.008750804  
C 0.003054830187 -0.008432567086999999 3.581919254  
O -0.7970818184999999 0.7970313188999999 3.013234213  
C 3.581912359 -0.01082908697 -0.003540432186  
O 3.009680999 -0.8132619803999999 0.7971343812999999  
O 3.0122919019999999 0.7944804435999999 -0.8031669120999999  
C 0.009180282035000001 3.581383465 0.006769578978999999  
O 0.8084220440999999 3.010074891 -0.7966145626999999  
O -3.009020291 0.8078659864999999 0.8060820827999999  
C -0.003346512798000001 0.006652391428999999 -3.583579729000001  
O -0.8071460657 -0.7947157234999999 -3.014216963  
O 0.8010740201999999 0.8053146168000001 -3.011040958  
C -3.583574564 0.009049827377000001 0.003253003893  
O -3.016230165 -0.7932364457 -0.8010576277999999  
O -0.7931109439999999 3.011147329 0.8078728793999999  
C -0.01001744098 -3.585239577 -0.00760262035  
O -0.8109746898 -3.011603871 -0.8074684318999999  
O 0.7938278576999999 -3.0181337959999999 0.794383446  
C -0.005714743448 -5.075896192 -0.002311488867  
H 8.944978446999999 -1.73802636 1.708825535  
C 7.166557128 0.8509425830999998 -0.8656405017999999  
B 7.797186308999999 -3.662463194 3.628658441999999  
C -4.98356264 0.008362464348999999 -0.002482391202  
C 5.7360116369999999 -2.560830268 2.5364802929999999  
C 5.7772651829999999 -0.8601664526 0.8423267605  
H 7.7275763969999999 1.515452898 -1.528974018  
H 5.229417135 1.525289674 -1.532493864  
C 5.776125075 0.8532885278 -0.8644797624  
F 6.844399095999999 -4.396842793999999 4.362576411  
F 9.206666662 -3.678282702 3.640882422  
C -0.01166293599 0.005033113740999999 -4.9835540869999999  
C 5.0758928059999999 -0.003126622774 -0.009635751917999999  
H 8.9573213279999999 -0.01270862644 -0.009821881387999998  
C 7.1677728429999999 -0.8600874402999998 0.8387531465999999  
C 7.851202703 -1.725742503 1.699304045  
C 7.8634492549999999 -0.005265627748 -0.01449109999  
C 0.04396635773 5.1946408699999999 0.040413300989999999  
C -0.8503016577999998 5.774818662 -0.8525958258999999  
C -0.8472364843 7.1652570359999999 -0.8504656691999998  
C 0.0084575933 7.8596909769999999 0.003188601708999999  
C 0.8623193297 7.161415834000001 0.8559447949  
C 0.8614153359999999 5.7710676369999998 0.8559717714999999  
O 1.718340578 5.072215416 1.711786215  
C 2.560315049 5.724962876 2.5517739979999999  
C 2.576296403 7.12441826 2.5667905259999999  
C 1.727159976 7.8425592309999999 1.718737673  
O 3.300925372 5.099554367 3.291438609

B 3.661876094 7.782988681000001 3.649931079999999  
 F 4.395013939 6.828095789999999 4.382357207  
 F 3.678399509 9.192428536999998 3.665482008  
 H -1.52187739 5.230034086 -1.522570815  
 H -1.510781707 7.728179841999999 -1.513165323  
 H 0.01644550436 8.95356 0.01043066254  
 H 1.739992534 8.936287349000001 1.730815553  
 C 1.712619317 -1.721631909 7.849211683999999  
 C 0.0 0.0 7.863464373999999  
 C 2.559799639 -2.573243995 7.132508334999999  
 C 0.8513889166999999 -0.855857778 7.166789323999999  
 C -0.8518600472 0.8563119774999999 7.167568769999999  
 C 2.545336882 -2.558693685000001 5.733041101  
 C 0.8523993626999999 -0.856868599 5.7762778  
 C -0.8532607063 0.8577277862999999 5.777135683999999  
 C -0.0002814954319999999 0.000272557141 5.075902906999999  
 O 1.707115111 -1.71605838 5.078884757999999  
 O 3.284069746 -3.301292418 5.108890862  
 H 1.72414872 -1.733191061 8.942975999  
 H 0.006680556007 -0.006714976792999999 8.957330720999998  
 B 3.640575938 -3.659679796 7.792936794999999  
 H -1.513714005 1.521641171 7.729364400999998  
 H -1.521832107 1.529810538 5.231209839  
 F 4.372245368999999 -4.395187360999999 6.839290683999999  
 F 3.655387387 -3.674565386 9.2024025  
 O 5.080874688 -1.718317566 1.698901385  
 O 5.112727950999999 -3.302516944 3.276859219  
 C 7.135493120999999 -2.576308034999999 2.548373772  
 H 0.8774352939 -5.538171384 -0.4179407209  
 H -0.8861899740999999 -5.543261926 -0.4179226517999999  
 H -0.004675634316 -5.432278195 1.017193679  
 H -5.339388166 0.008185713854999999 -1.022182427  
 H 0.8674911352999999 0.4407325033999999 -5.434834666  
 H -5.430458905999999 -0.8736724881 0.4319115204  
 H -0.01380144482 -1.013616356 -5.342369757  
 H -5.431324795 0.8899599141999999 0.4319079731  
 H -0.8961103623999999 0.4407446211 -5.424358162  
 H -2.501352412446134 5.819723865990614 -4.124939180423858  
 H -2.480124445960452 6.120764524823906 -4.45211598140008  
 C 1.504592140119092 5.505933092031738 -3.036503686934386  
 O 0.7321209920808048 4.979472080594086 -3.700753384072784  
 O 2.29689550888802 6.060037897503809 -2.394248380299257

**FigureS5\_a4**

Frame 9: Geometry 10, SCF Bond Energy: -22.33717 Hartree

Zn 1.118325877 -1.128235255 1.117020731

O 0.0 0.0 0.0

Zn -1.116900352 1.12047199 1.123505959

Zn 1.122193945 1.118972622 -1.119718947

Zn -1.126215951 -1.116505389 -1.12339591

O 0.8021369693 -0.8117837309 3.008750804

C 0.003054830187 -0.008432567086999999 3.581919254

O -0.7970818184999999 0.7970313188999999 3.013234213

C 3.581912359 -0.01082908697 -0.003540432186

O 3.009680999 -0.8132619803999999 0.7971343812999999

O 3.0122919019999999 0.7944804435999999 -0.8031669120999999

C 0.009180282035000001 3.581383465 0.006769578978999999

O 0.8084220440999999 3.010074891 -0.7966145626999999

O -3.009020291 0.8078659864999999 0.8060820827999999

C -0.003346512798000001 0.006652391428999999 -3.5835797290000001

O -0.8071460657 -0.7947157234999999 -3.014216963

O 0.8010740201999999 0.8053146168000001 -3.011040958

C -3.583574564 0.009049827377000001 0.003253003893

O -3.016230165 -0.7932364457 -0.8010576277999999

O -0.7931109439999999 3.011147329 0.8078728793999999

C -0.01001744098 -3.585239577 -0.00760262035

O -0.8109746898 -3.011603871 -0.8074684318999999

O 0.7938278576999999 -3.0181337959999999 0.794383446

C -0.005714743448 -5.075896192 -0.002311488867

H 8.944978446999999 -1.73802636 1.708825535

C 7.166557128 0.8509425830999999 -0.8656405017999999

B 7.797186308999999 -3.662463194 3.628658441999999

C -4.98356264 0.008362464348999999 -0.002482391202

C 5.736011636999999 -2.560830268 2.536480292999999

C 5.777265182999999 -0.8601664526 0.8423267605

H 7.727576396999999 1.515452898 -1.528974018

H 5.229417135 1.525289674 -1.532493864

C 5.776125075 0.8532885278 -0.8644797624

F 6.844399095999999 -4.396842793999999 4.362576411

F 9.206666662 -3.678282702 3.640882422

C -0.01166293599 0.005033113740999999 -4.983554086999999

C 5.075892805999999 -0.003126622774 -0.009635751917999999

H 8.957321327999999 -0.01270862644 -0.009821881387999998

C 7.167772842999999 -0.8600874402999998 0.8387531465999999

C 7.851202703 -1.725742503 1.699304045

C 7.863449254999999 -0.005265627748 -0.01449109999

C 0.04396635773 5.194640869999999 0.04041330098999999

C -0.8503016577999998 5.774818662 -0.8525958258999999

C -0.8472364843 7.165257035999999 -0.8504656691999998

C 0.0084575933 7.859690976999999 0.003188601708999999

C 0.8623193297 7.1614158340000001 0.8559447949

C 0.8614153359999999 5.771067636999998 0.8559717714999999

O 1.718340578 5.072215416 1.711786215  
C 2.560315049 5.724962876 2.551773997999999  
C 2.576296403 7.12441826 2.566790525999999  
C 1.727159976 7.842559230999999 1.718737673  
O 3.300925372 5.099554367 3.291438609  
B 3.661876094 7.782988681000001 3.649931079999999  
F 4.395013939 6.828095789999999 4.382357207  
F 3.678399509 9.192428536999998 3.665482008  
H -1.52187739 5.230034086 -1.522570815  
H -1.510781707 7.728179841999999 -1.513165323  
H 0.01644550436 8.95356 0.01043066254  
H 1.739992534 8.936287349000001 1.730815553  
C 1.712619317 -1.721631909 7.849211683999999  
C 0.0 0.0 7.863464373999999  
C 2.559799639 -2.573243995 7.132508334999999  
C 0.8513889166999999 -0.855857778 7.166789323999999  
C -0.8518600472 0.8563119774999999 7.167568769999999  
C 2.545336882 -2.558693685000001 5.733041101  
C 0.8523993626999999 -0.856868599 5.7762778  
C -0.8532607063 0.8577277862999999 5.777135683999999  
C -0.0002814954319999999 0.000272557141 5.075902906999999  
O 1.707115111 -1.71605838 5.078884757999999  
O 3.284069746 -3.301292418 5.108890862  
H 1.72414872 -1.733191061 8.942975999  
H 0.006680556007 -0.006714976792999999 8.957330720999998  
B 3.640575938 -3.659679796 7.792936794999999  
H -1.513714005 1.521641171 7.729364400999998  
H -1.521832107 1.529810538 5.231209839  
F 4.372245368999999 -4.395187360999999 6.839290683999999  
F 3.655387387 -3.674565386 9.2024025  
O 5.080874688 -1.718317566 1.698901385  
O 5.112727950999999 -3.302516944 3.276859219  
C 7.135493120999999 -2.576308034999999 2.548373772  
H 0.8774352939 -5.538171384 -0.4179407209  
H -0.8861899740999999 -5.543261926 -0.4179226517999999  
H -0.004675634316 -5.432278195 1.017193679  
H -5.339388166 0.008185713854999999 -1.022182427  
H 0.8674911352999999 0.4407325033999999 -5.434834666  
H -5.430458905999999 -0.8736724881 0.4319115204  
H -0.01380144482 -1.013616356 -5.342369757  
H -5.431324795 0.8899599141999999 0.4319079731  
H -0.8961103623999999 0.4407446211 -5.424358162  
H -2.502845664838624 5.776779325405495 -4.07758863532808  
H -2.478721873199239 6.161353552997004 -4.500264932432724  
C 1.51326616858716 5.511134480060788 -3.03687333538412  
O 0.6925468896222865 4.945677675224854 -3.7083824903268  
O 2.318608579592808 6.083236239459251 -2.393402202460863

## FigureS5\_a5

94

Frame 13: Geometry 14, SCF Bond Energy: -22.33301 Hartree

Zn 1.118325877 -1.128235255 1.117020731  
O 0.0 0.0 0.0  
Zn -1.116900352 1.12047199 1.123505959  
Zn 1.122193945 1.118972622 -1.119718947  
Zn -1.126215951 -1.116505389 -1.12339591  
O 0.8021369693 -0.8117837309 3.008750804  
C 0.003054830187 -0.008432567086999999 3.581919254  
O -0.7970818184999999 0.7970313188999999 3.013234213  
C 3.581912359 -0.01082908697 -0.003540432186  
O 3.009680999 -0.8132619803999999 0.7971343812999999  
O 3.0122919019999999 0.7944804435999999 -0.8031669120999999  
C 0.009180282035000001 3.581383465 0.006769578978999999  
O 0.8084220440999999 3.010074891 -0.7966145626999999  
O -3.009020291 0.8078659864999999 0.8060820827999999  
C -0.003346512798000001 0.006652391428999999 -3.5835797290000001  
O -0.8071460657 -0.7947157234999999 -3.014216963  
O 0.8010740201999999 0.8053146168000001 -3.011040958  
C -3.583574564 0.009049827377000001 0.003253003893  
O -3.016230165 -0.7932364457 -0.8010576277999999  
O -0.7931109439999999 3.011147329 0.8078728793999999  
C -0.01001744098 -3.585239577 -0.00760262035  
O -0.8109746898 -3.011603871 -0.8074684318999998  
O 0.7938278576999999 -3.0181337959999999 0.794383446  
C -0.005714743448 -5.075896192 -0.002311488867  
H 8.944978446999999 -1.73802636 1.708825535  
C 7.166557128 0.8509425830999998 -0.8656405017999999  
B 7.797186308999999 -3.662463194 3.628658441999999  
C -4.98356264 0.008362464348999999 -0.002482391202  
C 5.736011636999999 -2.560830268 2.536480292999999  
C 5.777265182999999 -0.8601664526 0.8423267605  
H 7.727576396999999 1.515452898 -1.528974018  
H 5.229417135 1.525289674 -1.532493864  
C 5.776125075 0.8532885278 -0.8644797624  
F 6.844399095999999 -4.396842793999999 4.362576411  
F 9.206666662 -3.678282702 3.640882422  
C -0.01166293599 0.005033113740999999 -4.983554086999999  
C 5.075892805999999 -0.003126622774 -0.009635751917999999  
H 8.957321327999999 -0.01270862644 -0.009821881387999998  
C 7.167772842999999 -0.8600874402999998 0.8387531465999999  
C 7.851202703 -1.725742503 1.699304045  
C 7.863449254999999 -0.005265627748 -0.01449109999  
C 0.04396635773 5.194640869999999 0.04041330098999999  
C -0.8503016577999998 5.774818662 -0.8525958258999999

C -0.8472364843 7.165257035999999 -0.8504656691999998  
C 0.0084575933 7.859690976999999 0.003188601708999999  
C 0.8623193297 7.161415834000001 0.8559447949  
C 0.8614153359999999 5.771067636999998 0.8559717714999999  
O 1.718340578 5.072215416 1.711786215  
C 2.560315049 5.724962876 2.551773997999999  
C 2.576296403 7.12441826 2.566790525999999  
C 1.727159976 7.842559230999999 1.718737673  
O 3.300925372 5.099554367 3.291438609  
B 3.661876094 7.782988681000001 3.649931079999999  
F 4.395013939 6.828095789999999 4.382357207  
F 3.678399509 9.192428536999998 3.665482008  
H -1.52187739 5.230034086 -1.522570815  
H -1.510781707 7.728179841999999 -1.513165323  
H 0.01644550436 8.95356 0.01043066254  
H 1.739992534 8.936287349000001 1.730815553  
C 1.712619317 -1.721631909 7.849211683999999  
C 0.0 0.0 7.863464373999999  
C 2.559799639 -2.573243995 7.132508334999999  
C 0.8513889166999999 -0.855857778 7.166789323999999  
C -0.8518600472 0.8563119774999999 7.167568769999999  
C 2.545336882 -2.558693685000001 5.733041101  
C 0.8523993626999999 -0.856868599 5.7762778  
C -0.8532607063 0.8577277862999999 5.777135683999999  
C -0.0002814954319999999 0.000272557141 5.075902906999999  
O 1.707115111 -1.71605838 5.078884757999999  
O 3.284069746 -3.301292418 5.108890862  
H 1.72414872 -1.733191061 8.942975999  
H 0.006680556007 -0.006714976792999999 8.957330720999998  
B 3.640575938 -3.659679796 7.792936794999999  
H -1.513714005 1.521641171 7.729364400999998  
H -1.521832107 1.529810538 5.231209839  
F 4.372245368999999 -4.395187360999999 6.839290683999999  
F 3.655387387 -3.674565386 9.2024025  
O 5.080874688 -1.718317566 1.698901385  
O 5.112727950999999 -3.302516944 3.276859219  
C 7.135493120999999 -2.576308034999999 2.548373772  
H 0.8774352939 -5.538171384 -0.4179407209  
H -0.8861899740999999 -5.543261926 -0.4179226517999999  
H -0.004675634316 -5.432278195 1.017193679  
H -5.339388166 0.008185713854999999 -1.022182427  
H 0.8674911352999999 0.4407325033999999 -5.434834666  
H -5.430458905999999 -0.8736724881 0.4319115204  
H -0.01380144482 -1.013616356 -5.342369757  
H -5.431324795 0.8899599141999999 0.4319079731  
H -0.8961103623999999 0.4407446211 -5.424358162  
H -3.071151473143219 5.957431678105905 -4.190593584363062  
H -2.293818737918141 6.243639072921872 -4.831597416818851

C 1.479730380324086 5.406742667038799 -3.059293126008745  
O 0.7488983791306552 4.897672455248896 -3.740303414154308  
O 2.265658834445987 5.929472478646962 -2.414988602415774

### FigureS5\_a6

94

Frame 17: Geometry 18, SCF Bond Energy: -22.34971 Hartree

Zn 1.118325877 -1.128235255 1.117020731  
O 0.0 0.0 0.0  
Zn -1.116900352 1.12047199 1.123505959  
Zn 1.122193945 1.118972622 -1.119718947  
Zn -1.126215951 -1.116505389 -1.12339591  
O 0.8021369693 -0.8117837309 3.008750804  
C 0.003054830187 -0.008432567086999999 3.581919254  
O -0.7970818184999999 0.7970313188999999 3.013234213  
C 3.581912359 -0.01082908697 -0.003540432186  
O 3.009680999 -0.8132619803999999 0.7971343812999999  
O 3.0122919019999999 0.7944804435999999 -0.8031669120999999  
C 0.009180282035000001 3.581383465 0.006769578978999999  
O 0.8084220440999999 3.010074891 -0.7966145626999999  
O -3.009020291 0.8078659864999999 0.8060820827999999  
C -0.003346512798000001 0.006652391428999999 -3.5835797290000001  
O -0.8071460657 -0.7947157234999999 -3.014216963  
O 0.8010740201999999 0.8053146168000001 -3.011040958  
C -3.583574564 0.009049827377000001 0.003253003893  
O -3.016230165 -0.7932364457 -0.8010576277999999  
O -0.7931109439999999 3.011147329 0.8078728793999999  
C -0.01001744098 -3.585239577 -0.00760262035  
O -0.8109746898 -3.011603871 -0.8074684318999998  
O 0.7938278576999999 -3.0181337959999999 0.794383446  
C -0.005714743448 -5.075896192 -0.002311488867  
H 8.944978446999999 -1.73802636 1.708825535  
C 7.166557128 0.8509425830999998 -0.8656405017999999  
B 7.797186308999999 -3.662463194 3.628658441999999  
C -4.98356264 0.008362464348999999 -0.002482391202  
C 5.736011636999999 -2.560830268 2.536480292999999  
C 5.777265182999999 -0.8601664526 0.8423267605  
H 7.727576396999999 1.515452898 -1.528974018  
H 5.229417135 1.525289674 -1.532493864  
C 5.776125075 0.8532885278 -0.8644797624  
F 6.844399095999999 -4.396842793999999 4.362576411  
F 9.206666662 -3.678282702 3.640882422  
C -0.01166293599 0.005033113740999999 -4.983554086999999  
C 5.075892805999999 -0.003126622774 -0.009635751917999999  
H 8.957321327999999 -0.01270862644 -0.009821881387999998



C 7.167772842999999 -0.8600874402999998 0.8387531465999999  
C 7.851202703 -1.725742503 1.699304045  
C 7.863449254999999 -0.005265627748 -0.01449109999  
C 0.04396635773 5.194640869999999 0.04041330098999999  
C -0.8503016577999998 5.774818662 -0.8525958258999999  
C -0.8472364843 7.165257035999999 -0.8504656691999998  
C 0.0084575933 7.859690976999999 0.003188601708999999  
C 0.8623193297 7.161415834000001 0.8559447949  
C 0.8614153359999999 5.771067636999998 0.8559717714999999  
O 1.718340578 5.072215416 1.711786215  
C 2.560315049 5.724962876 2.5517739979999999  
C 2.576296403 7.12441826 2.5667905259999999  
C 1.727159976 7.842559230999999 1.718737673  
O 3.300925372 5.099554367 3.291438609  
B 3.661876094 7.782988681000001 3.6499310799999999  
F 4.395013939 6.828095789999999 4.382357207  
F 3.678399509 9.192428536999998 3.665482008  
H -1.52187739 5.230034086 -1.522570815  
H -1.510781707 7.728179841999999 -1.513165323  
H 0.01644550436 8.95356 0.01043066254  
H 1.739992534 8.936287349000001 1.730815553  
C 1.712619317 -1.721631909 7.8492116839999999  
C 0.0 0.0 7.8634643739999999  
C 2.559799639 -2.573243995 7.1325083349999999  
C 0.8513889166999999 -0.855857778 7.1667893239999999  
C -0.8518600472 0.8563119774999999 7.1675687699999999  
C 2.545336882 -2.558693685000001 5.733041101  
C 0.8523993626999999 -0.856868599 5.7762778  
C -0.8532607063 0.8577277862999999 5.7771356839999999  
C -0.0002814954319999999 0.000272557141 5.0759029069999999  
O 1.707115111 -1.71605838 5.0788847579999999  
O 3.284069746 -3.301292418 5.108890862  
H 1.72414872 -1.733191061 8.942975999  
H 0.006680556007 -0.006714976792999999 8.9573307209999998  
B 3.640575938 -3.659679796 7.7929367949999999  
H -1.513714005 1.521641171 7.7293644009999998  
H -1.521832107 1.529810538 5.231209839  
F 4.372245368999999 -4.395187360999999 6.8392906839999999  
F 3.655387387 -3.674565386 9.2024025  
O 5.080874688 -1.718317566 1.698901385  
O 5.1127279509999999 -3.302516944 3.276859219  
C 7.1354931209999999 -2.5763080349999999 2.548373772  
H 0.8774352939 -5.538171384 -0.4179407209  
H -0.8861899740999999 -5.543261926 -0.41792265179999999  
H -0.004675634316 -5.432278195 1.017193679  
H -5.339388166 0.008185713854999999 -1.022182427  
H 0.8674911352999999 0.4407325033999999 -5.434834666  
H -5.4304589059999999 -0.8736724881 0.4319115204

H -0.01380144482 -1.013616356 -5.342369757  
H -5.431324795 0.8899599141999999 0.4319079731  
H -0.8961103623999999 0.4407446211 -5.424358162  
H -3.072233639005895 5.845567227202834 -4.300493355818586  
H -2.501876102665909 6.3919862208118 -4.88302703199054  
C 1.501802818687155 5.384100498702789 -3.078137999390074  
O 0.6483139124326297 4.903248474336331 -3.738852946335403  
O 2.379308200458677 5.850615327650377 -2.43612689858329

## FigureS6\_b1

95

Frame 1: Geometry 2, SCF Bond Energy: -22.55634 Hartree

Zn 1.589227043 -1.29697559 1.416164534  
O 0.7365071251999998 -0.7780997006999999 -0.2496504088  
Zn -0.8820363213999999 0.2207960636 0.1346852258  
Zn 1.951109251 0.328212789 -1.282125033  
Zn 0.2871873256999999 -2.37065937 -1.268880726  
O 0.5913578901999999 -0.672892423 2.963270548  
C -0.4878202884999999 -0.006751519597000001 3.0269744319999999  
O -1.176673843 0.4129351586 2.046292386  
C 4.040539404 0.1649380559 0.762415026  
O 3.384582631 -0.5669892729999999 1.566424064  
O 3.643359998 0.5956833602999999 -0.3641285439999999  
C 0.09092655746 2.588954508 -1.285318945  
O 1.206995178 2.090725852 -1.627029351  
O -2.459916077 -0.6456766368 -0.5988806059999999  
C 1.961459269 -1.551558128 -3.527355922  
O 1.171256328 -2.394430197 -3.000474033  
O 2.361029534 -0.4628938763 -3.00975749  
C -2.568634555 -1.723313455 -1.261929307  
O -1.623917076 -2.500407231 -1.602653051  
O -0.8194385007 2.013895043 -0.6136426593999999  
C 1.382303687 -4.149179039 0.7861448729  
O 0.8141806916 -3.997653924 -0.3384226684  
O 1.744775623 -3.2282482 1.58078842  
C 1.65571441 -5.5467008599999999 1.226920317  
H 8.709702646 0.3434940855999999 4.3463957530000001  
C 7.4828039370000001 1.741539476 0.7361870891  
B 7.343627763999998 -1.352128542 6.3377133139999999  
C -3.856676059 -2.098066428 -1.662565392  
C 5.618361794 -1.10394527 4.4359373979999999  
C 5.9280337089999999 0.1358812153 2.403439169  
H 8.1064156349999999 2.370811123 0.094740617059999999  
H 5.803699031 1.713944798 -0.6172507577999999  
C 6.2006511059999999 1.373678762 0.3436686076

F 6.347491698 -2.136011877 6.953336827999999  
F 8.641194798999999 -0.9889382821 6.751775113  
C 2.434312064999999 -1.859548038 -4.808586752  
C 5.417979525 0.5687406225 1.176753363  
H 8.996648026000001 1.593449064 2.276154832  
C 7.210642604 0.5055148625999999 2.793066834999999  
C 7.702783926 0.06165306763 4.025043514  
C 7.988857009 1.308091066 1.960621328  
C -0.1821282627 4.120478193 -1.715223227  
C -0.8054804096999999 4.233052423 -2.953183646  
C -1.056409962 5.540038343999999 -3.355868347  
C -0.6870514462 6.605576050999999 -2.536490444  
C -0.06563670378 6.362591610000001 -1.31229134  
C 0.186528091 5.056734768 -0.9070509766999999  
O 0.8098219182999999 4.814688969 0.3209768304  
C 1.178811134 5.834456441 1.136146135  
C 0.9337230876 7.156150446999999 0.746257596  
C 0.3114344579 7.420070784 -0.4781016994999999  
O 1.721394136 5.605157766999999 2.203745777  
B 1.442735961 8.299109833999999 1.850767198  
F 2.040873357 7.7568419 3.005728976  
F 1.196147217 9.630440378999998 1.458608386  
H -1.095406273 3.396999896 -3.596324261  
H -1.543004904 5.747910674 -4.3131351  
H -0.8812301468 7.636487265999999 -2.846623306  
H 0.1200871037 8.453190924999998 -0.7824053487  
C -0.06441925129999999 -0.2328349847 7.909296136999999  
C -1.960834017 0.9308555253999999 6.936300799  
C 1.117100802 -0.9626800089999998 7.742089861999999  
C -0.7815331501999999 0.2024971394 6.7898246  
C -2.66296935 1.356869609 5.809924126999999  
C 1.581173155 -1.257012437 6.454870108999999  
C -0.3034420286 -0.100380808 5.519699341999999  
C -2.187568628999999 1.055645309 4.538481556999999  
C -1.00494816 0.3252198403 4.388755562  
O 0.8797772447 -0.8311381482999999 5.374478798999999  
O 2.611170056 -1.89325581 6.309806681  
H -0.4268762763 -0.002912890016 8.915451022999999  
H -2.328675923 1.16405737 7.939766063999999  
B 2.084232353 -1.551534826 8.96785186  
H -3.586669828999999 1.927476006 5.942263439  
H -2.738715601 1.390065152 3.654672553999999  
F 3.219453994 -2.25460923 8.517617866999999  
F 1.617112647 -1.255251425 10.26440493  
O 5.148624706999999 -0.6692878018999999 3.239697265  
O 4.924987251999999 -1.805529052 5.152704147999999  
C 6.906765731999999 -0.7431689363 4.846772123  
C 3.694326815079481 -4.042690870403033 3.242238753925445

O 4.860326800909784 -3.735934475782102 2.770304076879926  
O 3.364471566688087 -4.47959505111999 4.414686881419326  
H -3.834769012 -2.414609901 -2.694902696999999  
H 3.319993996999999 -1.314329337 -5.099626409999999  
H -4.257004619999999 -2.950967556 -1.13464806  
H 2.740790656999999 -2.894672593 -4.840019667999999  
H -4.578736444 -1.295040313 -1.649229052  
H 1.691182728 -1.781743883 -5.588397819999999  
H 2.69625751 -5.835922873000001 1.231468292  
H 1.07194036 -6.310408376 0.7346209281999999  
H 1.371811528 -5.659521028 2.262811605  
O 4.261084012043564 -2.586912085682901 -0.3827260184175121  
H 4.322642751767124 -2.986053963584021 0.5338979302706692  
H 4.801965404660738 -3.235336214150384 -0.9182178996159039

## FigureS6\_b2

95

Frame 5: Geometry 6, SCF Bond Energy: -22.58520 Hartree

Zn 1.589227043 -1.29697559 1.416164534  
O 0.7365071251999998 -0.7780997006999999 -0.2496504088  
Zn -0.8820363213999999 0.2207960636 0.1346852258  
Zn 1.951109251 0.328212789 -1.282125033  
Zn 0.2871873256999999 -2.37065937 -1.268880726  
O 0.5913578901999999 -0.672892423 2.963270548  
C -0.4878202884999999 -0.006751519597000001 3.026974431999999  
O -1.176673843 0.4129351586 2.046292386  
C 4.040539404 0.1649380559 0.762415026  
O 3.384582631 -0.5669892729999999 1.566424064  
O 3.643359998 0.5956833602999999 -0.3641285439999999  
C 0.09092655746 2.588954508 -1.285318945  
O 1.206995178 2.090725852 -1.627029351  
O -2.459916077 -0.6456766368 -0.5988806059999999  
C 1.961459269 -1.551558128 -3.527355922  
O 1.171256328 -2.394430197 -3.000474033  
O 2.361029534 -0.4628938763 -3.00975749  
C -2.568634555 -1.723313455 -1.261929307  
O -1.623917076 -2.500407231 -1.602653051  
O -0.8194385007 2.013895043 -0.6136426593999999  
C 1.382303687 -4.149179039 0.7861448729  
O 0.8141806916 -3.997653924 -0.3384226684  
O 1.744775623 -3.2282482 1.58078842  
C 1.65571441 -5.546700859999999 1.226920317  
H 8.709702646 0.3434940855999999 4.346395753000001  
C 7.482803937000001 1.741539476 0.7361870891  
B 7.343627763999998 -1.352128542 6.337713313999999

C -3.856676059 -2.098066428 -1.662565392  
C 5.618361794 -1.10394527 4.435937397999999  
C 5.928033708999999 0.1358812153 2.403439169  
H 8.106415634999999 2.370811123 0.09474061705999999  
H 5.803699031 1.713944798 -0.6172507577999999  
C 6.200651105999999 1.373678762 0.3436686076  
F 6.347491698 -2.136011877 6.953336827999999  
F 8.641194798999999 -0.9889382821 6.751775113  
C 2.434312064999999 -1.859548038 -4.808586752  
C 5.417979525 0.5687406225 1.176753363  
H 8.996648026000001 1.593449064 2.276154832  
C 7.210642604 0.5055148625999999 2.793066834999999  
C 7.702783926 0.06165306763 4.025043514  
C 7.988857009 1.308091066 1.960621328  
C -0.1821282627 4.120478193 -1.715223227  
C -0.8054804096999999 4.233052423 -2.953183646  
C -1.056409962 5.540038343999999 -3.355868347  
C -0.6870514462 6.605576050999999 -2.536490444  
C -0.06563670378 6.362591610000001 -1.31229134  
C 0.186528091 5.056734768 -0.9070509766999999  
O 0.8098219182999999 4.814688969 0.3209768304  
C 1.178811134 5.834456441 1.136146135  
C 0.9337230876 7.156150446999999 0.746257596  
C 0.3114344579 7.420070784 -0.4781016994999999  
O 1.721394136 5.605157766999999 2.203745777  
B 1.442735961 8.299109833999999 1.850767198  
F 2.040873357 7.7568419 3.005728976  
F 1.196147217 9.630440378999999 1.458608386  
H -1.095406273 3.396999896 -3.596324261  
H -1.543004904 5.747910674 -4.3131351  
H -0.8812301468 7.636487265999999 -2.846623306  
H 0.1200871037 8.453190924999999 -0.7824053487  
C -0.06441925129999999 -0.2328349847 7.909296136999999  
C -1.960834017 0.9308555253999999 6.936300799  
C 1.117100802 -0.9626800089999999 7.742089861999999  
C -0.7815331501999999 0.2024971394 6.7898246  
C -2.66296935 1.356869609 5.809924126999999  
C 1.581173155 -1.257012437 6.454870108999999  
C -0.3034420286 -0.100380808 5.519699341999999  
C -2.187568628999999 1.055645309 4.538481556999999  
C -1.00494816 0.3252198403 4.388755562  
O 0.8797772447 -0.8311381482999999 5.374478798999999  
O 2.611170056 -1.89325581 6.309806681  
H -0.4268762763 -0.002912890016 8.915451022999999  
H -2.328675923 1.16405737 7.939766063999999  
B 2.084232353 -1.551534826 8.96785186  
H -3.586669828999999 1.927476006 5.942263439  
H -2.738715601 1.390065152 3.654672553999999

F 3.219453994 -2.25460923 8.517617866999999  
 F 1.617112647 -1.255251425 10.26440493  
 O 5.148624706999999 -0.6692878018999999 3.239697265  
 O 4.924987251999999 -1.805529052 5.152704147999999  
 C 6.906765731999999 -0.7431689363 4.846772123  
 C 3.894749516841932 -4.257429571592179 3.311231137885951  
 O 4.84064160441522 -3.889236914186391 2.699588689803462  
 O 3.551886343865807 -4.6895558292304 4.412031927648129  
 H -3.834769012 -2.414609901 -2.694902696999999  
 H 3.319993996999999 -1.314329337 -5.099626409999999  
 H -4.257004619999999 -2.950967556 -1.13464806  
 H 2.740790656999999 -2.894672593 -4.840019667999999  
 H -4.578736444 -1.295040313 -1.649229052  
 H 1.691182728 -1.781743883 -5.588397819999999  
 H 2.69625751 -5.835922873000001 1.231468292  
 H 1.07194036 -6.310408376 0.7346209281999999  
 H 1.371811528 -5.659521028 2.262811605  
 O 4.209605499977926 -2.815347719844498 -0.3632402935821819  
 H 4.316179263050549 -2.925867703628438 0.5118091152868062  
 H 4.833647591672182 -3.131765751397182 -0.8770400165769199

**FigureS6\_b3**

95

Frame 18: Geometry 19, SCF Bond Energy: -22.62203 Hartree

Zn 1.589227043 -1.29697559 1.416164534  
 O 0.7365071251999998 -0.7780997006999999 -0.2496504088  
 Zn -0.8820363213999999 0.2207960636 0.1346852258  
 Zn 1.951109251 0.328212789 -1.282125033  
 Zn 0.2871873256999999 -2.37065937 -1.268880726  
 O 0.5913578901999999 -0.672892423 2.963270548  
 C -0.4878202884999999 -0.006751519597000001 3.026974431999999  
 O -1.176673843 0.4129351586 2.046292386  
 C 4.040539404 0.1649380559 0.762415026  
 O 3.384582631 -0.5669892729999999 1.566424064  
 O 3.643359998 0.5956833602999999 -0.3641285439999999  
 C 0.09092655746 2.588954508 -1.285318945  
 O 1.206995178 2.090725852 -1.627029351  
 O -2.459916077 -0.6456766368 -0.5988806059999999  
 C 1.961459269 -1.551558128 -3.527355922  
 O 1.171256328 -2.394430197 -3.000474033  
 O 2.361029534 -0.4628938763 -3.00975749  
 C -2.568634555 -1.723313455 -1.261929307  
 O -1.623917076 -2.500407231 -1.602653051  
 O -0.8194385007 2.013895043 -0.6136426593999999  
 C 1.382303687 -4.149179039 0.7861448729

O 0.8141806916 -3.997653924 -0.3384226684  
O 1.744775623 -3.2282482 1.58078842  
C 1.65571441 -5.546700859999999 1.226920317  
H 8.709702646 0.3434940855999999 4.346395753000001  
C 7.482803937000001 1.741539476 0.7361870891  
B 7.343627763999998 -1.352128542 6.337713313999999  
C -3.856676059 -2.098066428 -1.662565392  
C 5.618361794 -1.10394527 4.435937397999999  
C 5.928033708999999 0.1358812153 2.403439169  
H 8.106415634999999 2.370811123 0.09474061705999999  
H 5.803699031 1.713944798 -0.6172507577999999  
C 6.200651105999999 1.373678762 0.3436686076  
F 6.347491698 -2.136011877 6.953336827999999  
F 8.641194798999999 -0.9889382821 6.751775113  
C 2.434312064999999 -1.859548038 -4.808586752  
C 5.417979525 0.5687406225 1.176753363  
H 8.996648026000001 1.593449064 2.276154832  
C 7.210642604 0.5055148625999999 2.793066834999999  
C 7.702783926 0.06165306763 4.025043514  
C 7.988857009 1.308091066 1.960621328  
C -0.1821282627 4.120478193 -1.715223227  
C -0.8054804096999999 4.233052423 -2.953183646  
C -1.056409962 5.540038343999999 -3.355868347  
C -0.6870514462 6.605576050999999 -2.536490444  
C -0.06563670378 6.362591610000001 -1.31229134  
C 0.186528091 5.056734768 -0.9070509766999999  
O 0.8098219182999999 4.814688969 0.3209768304  
C 1.178811134 5.834456441 1.136146135  
C 0.9337230876 7.156150446999999 0.746257596  
C 0.3114344579 7.420070784 -0.4781016994999999  
O 1.721394136 5.605157766999999 2.203745777  
B 1.442735961 8.299109833999999 1.850767198  
F 2.040873357 7.7568419 3.005728976  
F 1.196147217 9.630440378999998 1.458608386  
H -1.095406273 3.396999896 -3.596324261  
H -1.543004904 5.747910674 -4.3131351  
H -0.8812301468 7.636487265999999 -2.846623306  
H 0.1200871037 8.453190924999998 -0.7824053487  
C -0.06441925129999999 -0.2328349847 7.909296136999999  
C -1.960834017 0.9308555253999999 6.936300799  
C 1.117100802 -0.9626800089999998 7.742089861999999  
C -0.7815331501999999 0.2024971394 6.7898246  
C -2.66296935 1.356869609 5.809924126999999  
C 1.581173155 -1.257012437 6.454870108999999  
C -0.3034420286 -0.100380808 5.519699341999999  
C -2.187568628999999 1.055645309 4.538481556999999  
C -1.00494816 0.3252198403 4.388755562  
O 0.8797772447 -0.8311381482999999 5.374478798999999



O 2.611170056 -1.89325581 6.309806681  
 H -0.4268762763 -0.002912890016 8.915451022999999  
 H -2.328675923 1.16405737 7.939766063999999  
 B 2.084232353 -1.551534826 8.96785186  
 H -3.586669828999999 1.927476006 5.942263439  
 H -2.738715601 1.390065152 3.654672553999999  
 F 3.219453994 -2.25460923 8.517617866999999  
 F 1.617112647 -1.255251425 10.26440493  
 O 5.148624706999999 -0.6692878018999999 3.239697265  
 O 4.924987251999999 -1.805529052 5.152704147999999  
 C 6.906765731999999 -0.7431689363 4.846772123  
 C 3.926426084116205 -4.187615944944578 3.483292575096194  
 O 4.84106798147389 -3.607547872876708 2.844075175015749  
 O 2.972656186239097 -4.753000609926853 4.040228343180913  
 H -3.834769012 -2.414609901 -2.694902696999999  
 H 3.319993996999999 -1.314329337 -5.099626409999999  
 H -4.257004619999999 -2.950967556 -1.13464806  
 H 2.740790656999999 -2.894672593 -4.840019667999999  
 H -4.578736444 -1.295040313 -1.649229052  
 H 1.691182728 -1.781743883 -5.588397819999999  
 H 2.69625751 -5.835922873000001 1.231468292  
 H 1.07194036 -6.310408376 0.7346209281999999  
 H 1.371811528 -5.659521028 2.262811605  
 O 4.152418991391459 -2.764299451662027 -0.4007821576207439  
 H 4.225914595067615 -2.970746758182306 0.5983588414171982  
 H 4.767797255454278 -3.402010131511296 -0.9005386900301813

#### FigureS6\_b4

95

Frame 20: Geometry 21, SCF Bond Energy: -22.60372 Hartree  
 Zn 1.589227043 -1.29697559 1.416164534  
 O 0.7365071251999998 -0.7780997006999999 -0.2496504088  
 Zn -0.8820363213999999 0.2207960636 0.1346852258  
 Zn 1.951109251 0.328212789 -1.282125033  
 Zn 0.2871873256999999 -2.37065937 -1.268880726  
 O 0.5913578901999999 -0.672892423 2.963270548  
 C -0.4878202884999999 -0.006751519597000001 3.026974431999999  
 O -1.176673843 0.4129351586 2.046292386  
 C 4.040539404 0.1649380559 0.762415026  
 O 3.384582631 -0.5669892729999999 1.566424064  
 O 3.643359998 0.5956833602999999 -0.3641285439999999  
 C 0.09092655746 2.588954508 -1.285318945  
 O 1.206995178 2.090725852 -1.627029351  
 O -2.459916077 -0.6456766368 -0.5988806059999999  
 C 1.961459269 -1.551558128 -3.527355922

O 1.171256328 -2.394430197 -3.000474033  
O 2.361029534 -0.4628938763 -3.00975749  
C -2.568634555 -1.723313455 -1.261929307  
O -1.623917076 -2.500407231 -1.602653051  
O -0.8194385007 2.013895043 -0.6136426593999999  
C 1.382303687 -4.149179039 0.7861448729  
O 0.8141806916 -3.997653924 -0.3384226684  
O 1.744775623 -3.2282482 1.58078842  
C 1.65571441 -5.546700859999999 1.226920317  
H 8.709702646 0.3434940855999999 4.346395753000001  
C 7.482803937000001 1.741539476 0.7361870891  
B 7.343627763999998 -1.352128542 6.337713313999999  
C -3.856676059 -2.098066428 -1.662565392  
C 5.618361794 -1.10394527 4.435937397999999  
C 5.928033708999999 0.1358812153 2.403439169  
H 8.106415634999999 2.370811123 0.09474061705999999  
H 5.803699031 1.713944798 -0.6172507577999999  
C 6.200651105999999 1.373678762 0.3436686076  
F 6.347491698 -2.136011877 6.953336827999999  
F 8.641194798999999 -0.9889382821 6.751775113  
C 2.434312064999999 -1.859548038 -4.808586752  
C 5.417979525 0.5687406225 1.176753363  
H 8.996648026000001 1.593449064 2.276154832  
C 7.210642604 0.5055148625999999 2.793066834999999  
C 7.702783926 0.06165306763 4.025043514  
C 7.988857009 1.308091066 1.960621328  
C -0.1821282627 4.120478193 -1.715223227  
C -0.8054804096999999 4.233052423 -2.953183646  
C -1.056409962 5.540038343999999 -3.355868347  
C -0.6870514462 6.605576050999999 -2.536490444  
C -0.06563670378 6.362591610000001 -1.31229134  
C 0.186528091 5.056734768 -0.9070509766999999  
O 0.8098219182999999 4.814688969 0.3209768304  
C 1.178811134 5.834456441 1.136146135  
C 0.9337230876 7.156150446999999 0.746257596  
C 0.3114344579 7.420070784 -0.4781016994999999  
O 1.721394136 5.605157766999999 2.203745777  
B 1.442735961 8.299109833999999 1.850767198  
F 2.040873357 7.7568419 3.005728976  
F 1.196147217 9.630440378999998 1.458608386  
H -1.095406273 3.396999896 -3.596324261  
H -1.543004904 5.747910674 -4.3131351  
H -0.8812301468 7.636487265999999 -2.846623306  
H 0.1200871037 8.453190924999998 -0.7824053487  
C -0.06441925129999999 -0.2328349847 7.909296136999999  
C -1.960834017 0.9308555253999999 6.936300799  
C 1.117100802 -0.9626800089999998 7.742089861999999  
C -0.7815331501999999 0.2024971394 6.7898246

C -2.66296935 1.356869609 5.809924126999999  
 C 1.581173155 -1.257012437 6.454870108999999  
 C -0.3034420286 -0.100380808 5.519699341999999  
 C -2.187568628999999 1.055645309 4.538481556999999  
 C -1.00494816 0.3252198403 4.388755562  
 O 0.8797772447 -0.8311381482999999 5.374478798999999  
 O 2.611170056 -1.89325581 6.309806681  
 H -0.4268762763 -0.002912890016 8.915451022999999  
 H -2.328675923 1.16405737 7.939766063999999  
 B 2.084232353 -1.551534826 8.96785186  
 H -3.586669828999999 1.927476006 5.942263439  
 H -2.738715601 1.390065152 3.654672553999999  
 F 3.219453994 -2.25460923 8.517617866999999  
 F 1.617112647 -1.255251425 10.26440493  
 O 5.148624706999999 -0.6692878018999999 3.239697265  
 O 4.924987251999999 -1.805529052 5.152704147999999  
 C 6.906765731999999 -0.7431689363 4.846772123  
 C 3.930406976794207 -4.210467312815887 3.424670582793679  
 O 4.788409708711532 -3.862169979025371 2.844965901449463  
 O 3.032767179344934 -4.569385170587069 4.090575810969984  
 H -3.834769012 -2.414609901 -2.694902696999999  
 H 3.319993996999999 -1.314329337 -5.099626409999999  
 H -4.257004619999999 -2.950967556 -1.13464806  
 H 2.740790656999999 -2.894672593 -4.840019667999999  
 H -4.578736444 -1.295040313 -1.649229052  
 H 1.691182728 -1.781743883 -5.588397819999999  
 H 2.69625751 -5.835922873000001 1.231468292  
 H 1.07194036 -6.310408376 0.7346209281999999  
 H 1.371811528 -5.659521028 2.262811605  
 O 3.998983273374593 -2.821911758298496 -0.3237803704505314  
 H 4.486461335214043 -3.048340017648728 0.4639834501087399  
 H 4.589031831519832 -3.184478307584324 -0.8113188949592239

**FigureS6\_b5**

95

Frame 61: Geometry 62, SCF Bond Energy: -22.62613 Hartree

Zn 1.589227043 -1.29697559 1.416164534  
 O 0.7365071251999998 -0.7780997006999999 -0.2496504088  
 Zn -0.8820363213999999 0.2207960636 0.1346852258  
 Zn 1.951109251 0.328212789 -1.282125033  
 Zn 0.2871873256999999 -2.37065937 -1.268880726  
 O 0.5913578901999999 -0.672892423 2.963270548  
 C -0.4878202884999999 -0.006751519597000001 3.026974431999999  
 O -1.176673843 0.4129351586 2.046292386  
 C 4.040539404 0.1649380559 0.762415026

O 3.384582631 -0.5669892729999999 1.566424064  
O 3.643359998 0.5956833602999999 -0.3641285439999999  
C 0.09092655746 2.588954508 -1.285318945  
O 1.206995178 2.090725852 -1.627029351  
O -2.459916077 -0.6456766368 -0.5988806059999999  
C 1.961459269 -1.551558128 -3.527355922  
O 1.171256328 -2.394430197 -3.000474033  
O 2.361029534 -0.4628938763 -3.00975749  
C -2.568634555 -1.723313455 -1.261929307  
O -1.623917076 -2.500407231 -1.602653051  
O -0.8194385007 2.013895043 -0.6136426593999999  
C 1.382303687 -4.149179039 0.7861448729  
O 0.8141806916 -3.997653924 -0.3384226684  
O 1.744775623 -3.2282482 1.58078842  
C 1.65571441 -5.546700859999999 1.226920317  
H 8.709702646 0.3434940855999999 4.346395753000001  
C 7.482803937000001 1.741539476 0.7361870891  
B 7.343627763999998 -1.352128542 6.337713313999999  
C -3.856676059 -2.098066428 -1.662565392  
C 5.618361794 -1.10394527 4.435937397999999  
C 5.928033708999999 0.1358812153 2.403439169  
H 8.106415634999999 2.370811123 0.09474061705999999  
H 5.803699031 1.713944798 -0.6172507577999999  
C 6.200651105999999 1.373678762 0.3436686076  
F 6.347491698 -2.136011877 6.953336827999999  
F 8.641194798999999 -0.9889382821 6.751775113  
C 2.434312064999999 -1.859548038 -4.808586752  
C 5.417979525 0.5687406225 1.176753363  
H 8.996648026000001 1.593449064 2.276154832  
C 7.210642604 0.5055148625999999 2.793066834999999  
C 7.702783926 0.06165306763 4.025043514  
C 7.988857009 1.308091066 1.960621328  
C -0.1821282627 4.120478193 -1.715223227  
C -0.8054804096999999 4.233052423 -2.953183646  
C -1.056409962 5.540038343999999 -3.355868347  
C -0.6870514462 6.605576050999999 -2.536490444  
C -0.06563670378 6.362591610000001 -1.31229134  
C 0.186528091 5.056734768 -0.9070509766999999  
O 0.8098219182999999 4.814688969 0.3209768304  
C 1.178811134 5.834456441 1.136146135  
C 0.9337230876 7.156150446999999 0.746257596  
C 0.3114344579 7.420070784 -0.4781016994999999  
O 1.721394136 5.605157766999999 2.203745777  
B 1.442735961 8.299109833999999 1.850767198  
F 2.040873357 7.7568419 3.005728976  
F 1.196147217 9.630440378999998 1.458608386  
H -1.095406273 3.396999896 -3.596324261  
H -1.543004904 5.747910674 -4.3131351

H -0.8812301468 7.636487265999999 -2.846623306  
H 0.1200871037 8.453190924999998 -0.7824053487  
C -0.06441925129999999 -0.2328349847 7.909296136999999  
C -1.960834017 0.9308555253999999 6.936300799  
C 1.117100802 -0.9626800089999998 7.742089861999999  
C -0.7815331501999999 0.2024971394 6.7898246  
C -2.66296935 1.356869609 5.809924126999999  
C 1.581173155 -1.257012437 6.454870108999999  
C -0.3034420286 -0.100380808 5.519699341999999  
C -2.187568628999999 1.055645309 4.538481556999999  
C -1.00494816 0.3252198403 4.388755562  
O 0.8797772447 -0.8311381482999999 5.374478798999999  
O 2.611170056 -1.89325581 6.309806681  
H -0.4268762763 -0.002912890016 8.915451022999999  
H -2.328675923 1.16405737 7.939766063999999  
B 2.084232353 -1.551534826 8.96785186  
H -3.586669828999999 1.927476006 5.942263439  
H -2.738715601 1.390065152 3.654672553999999  
F 3.219453994 -2.25460923 8.517617866999999  
F 1.617112647 -1.255251425 10.26440493  
O 5.148624706999999 -0.6692878018999999 3.239697265  
O 4.924987251999999 -1.805529052 5.152704147999999  
C 6.906765731999999 -0.7431689363 4.846772123  
C 3.670839379900157 -4.355758094383274 3.600029294461301  
O 4.592032067328109 -3.905161223950969 3.004765913181028  
O 2.757122326059812 -4.803708826144915 4.18411464246047  
H -3.834769012 -2.414609901 -2.694902696999999  
H 3.319993996999999 -1.314329337 -5.099626409999999  
H -4.257004619999999 -2.950967556 -1.13464806  
H 2.740790656999999 -2.894672593 -4.840019667999999  
H -4.578736444 -1.295040313 -1.649229052  
H 1.691182728 -1.781743883 -5.588397819999999  
H 2.69625751 -5.835922873000001 1.231468292  
H 1.07194036 -6.310408376 0.7346209281999999  
H 1.371811528 -5.659521028 2.262811605  
O 5.781910920729237 -2.315318908055824 0.6008558988817467  
H 5.103659076777527 -2.991187316529357 1.135255109545773  
H 5.850251378491905 -3.006881723678024 -0.2182687567809575
